# Supplementary material for: Human-Altered Landscapes and Climate to Predict Human Infectious Disease Hotspots
Source: MDPI journal article supplement (doi:10.3390/tropicalmed7070124), 2022-07-01

# Supplementary information for

## **Identifying hotspots in the distribution of human infectious diseases using a Bayesian framework: A lead to drivers, prevention, and surveillance of disease emergence**

This PDF contains:

- MCMC traceplots: pages 2-46
- MCMC model summaries: pages 47- 63
- True Skill Statistic (TSS) plots: pages 64-66
- ZIB iCAR random effects: pages 67-69
- Significant hotspots based on TSS: pages 70-72
- Table1: Reservoirs of diseases analyzed: pages 73 - 75
- Analysis of Coroviridae outbreak distribution with SARS CoV 2 origins: pages 76 - 84

Figure S1: MCMC traceplots

Trace of beta.(Intercept)

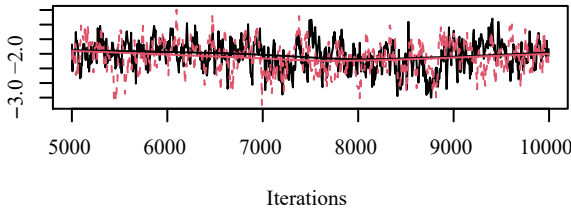

Density of beta.(Intercept)

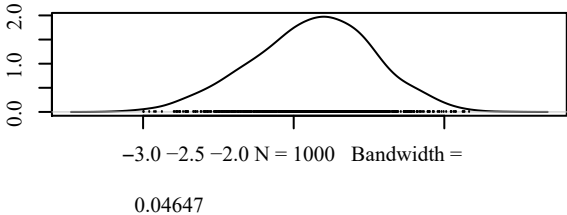

Trace of beta.layer.1

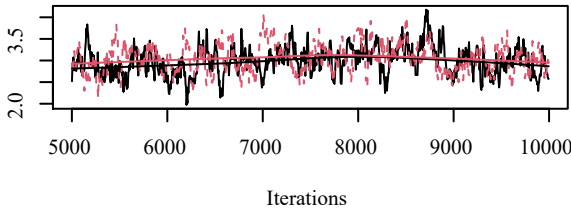

Density of beta.layer.1

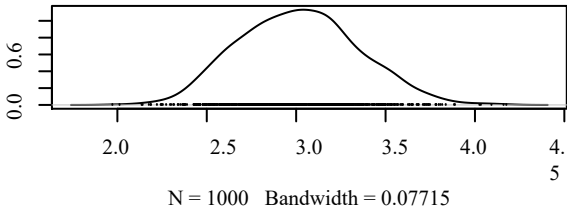

Trace of beta.layer.2

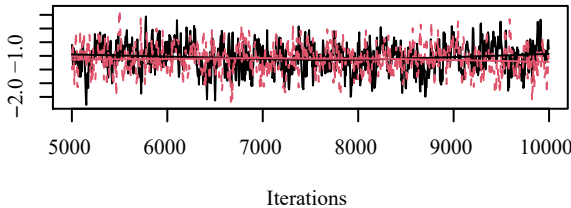

Density of beta.layer.2

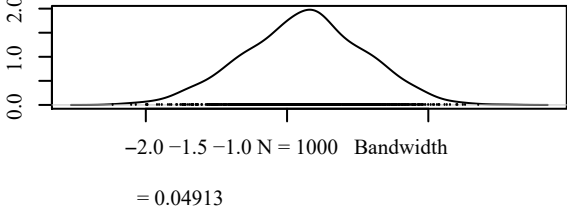

Trace of beta.layer

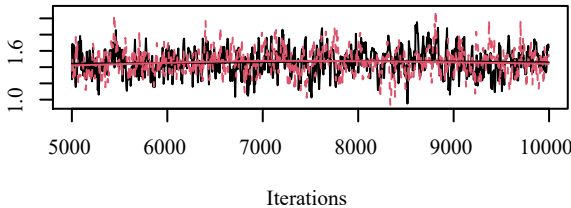

Density of beta.layer

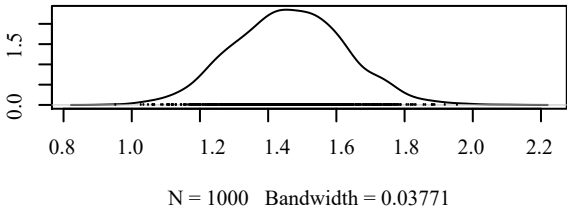

Figure S1: MCMC  
traceplots

**Trace of beta.lc**

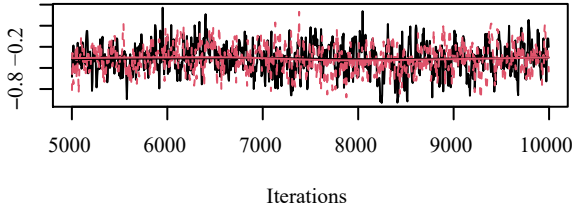

**Density of beta.lc**

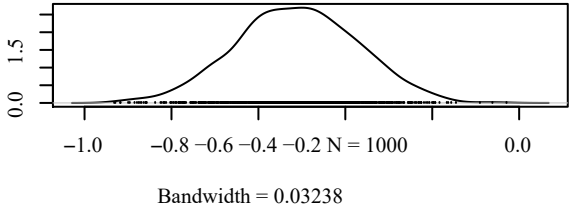

**Trace of beta.alt**

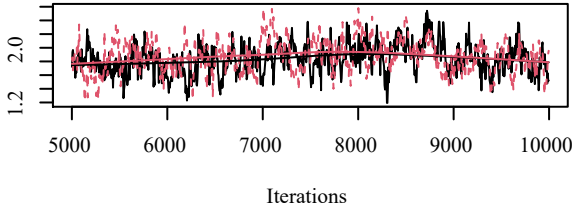

**Density of beta.alt**

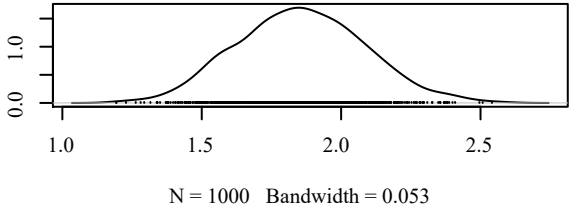

**Trace of beta.lc\_modi**

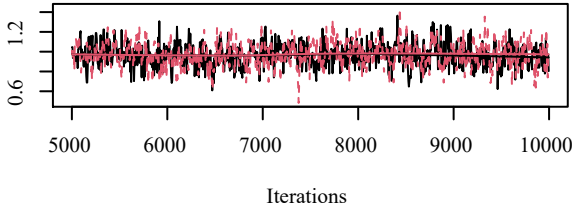

**Density of beta.lc\_modi**

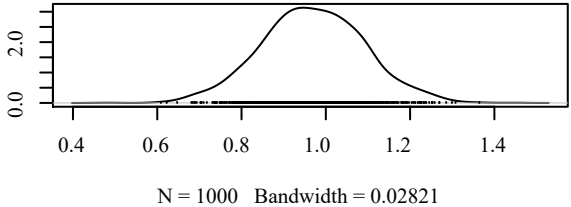

**Trace of beta.pop\_den**

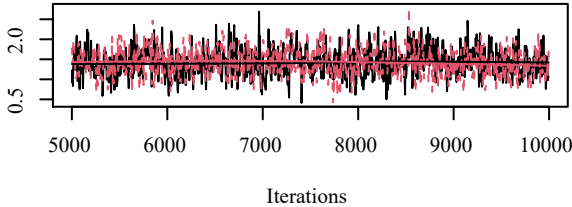

**Density of beta.pop\_den**

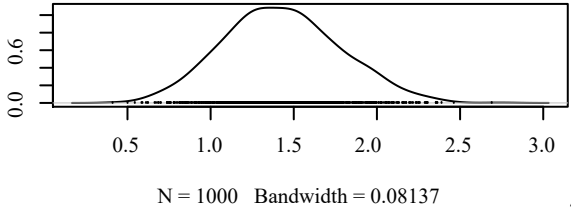

Figure S1: MCMC  
traceplots

Trace of Deviance

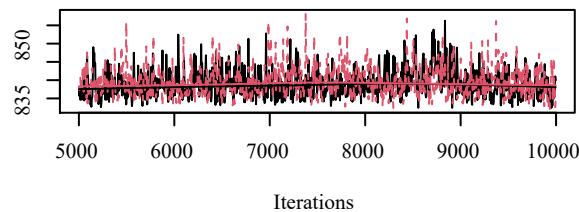

Density of Deviance

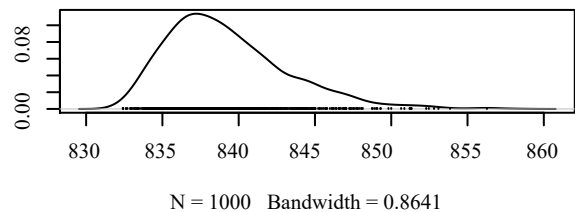

Trace of beta.(Intercept)

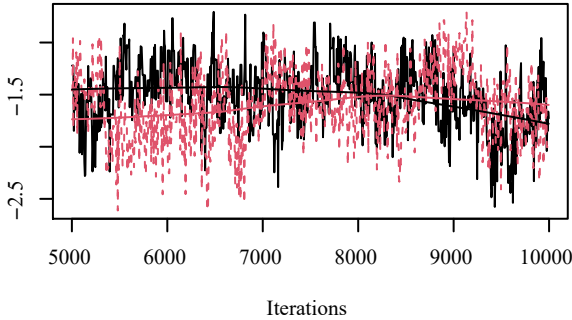

Density of beta.(Intercept)

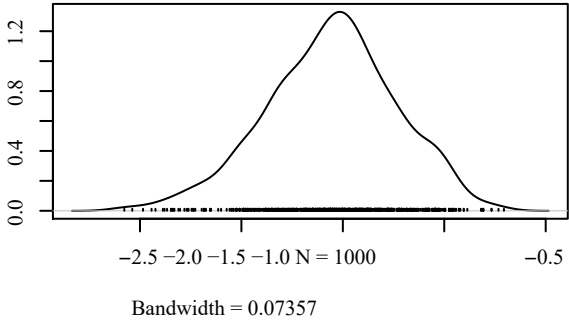

Trace of beta.layer.1

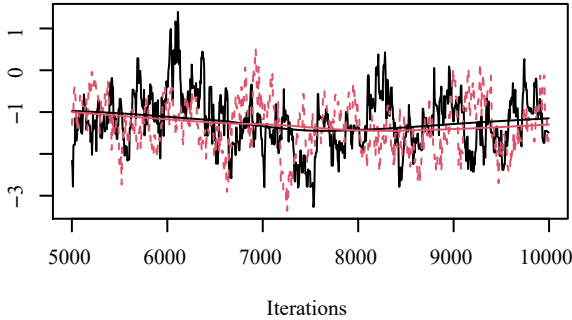

Density of beta.layer.1

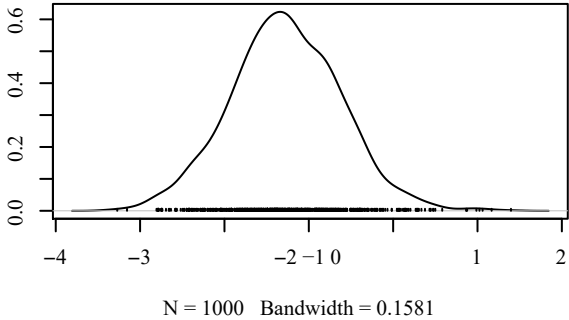

Trace of beta.layer.2

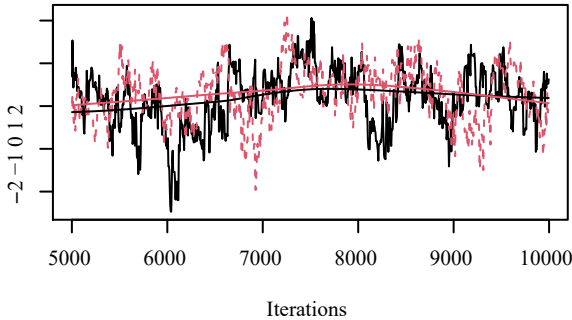

Density of beta.layer.2

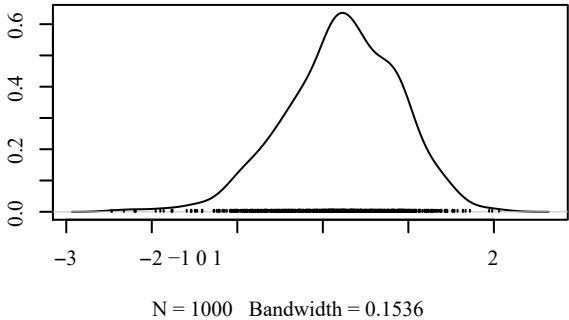

Filoviridae ZIB mcmc traceplot

Figure S1: MCMC  
traceplots

**Trace of beta.layer**

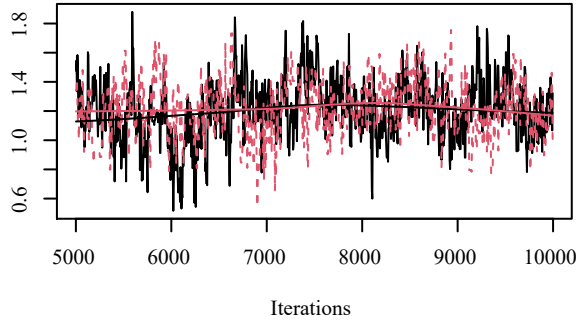

**Density of beta.layer**

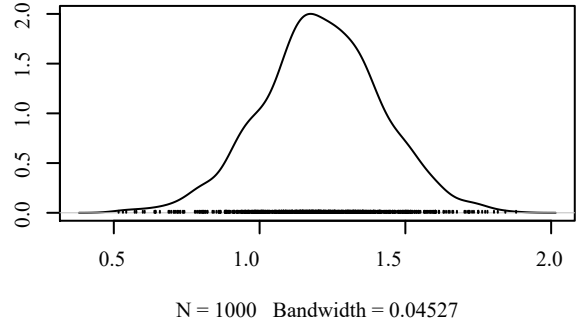

**Trace of beta.lc**

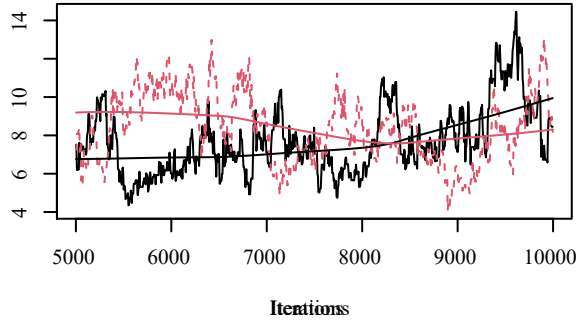

**Density of beta.lc**

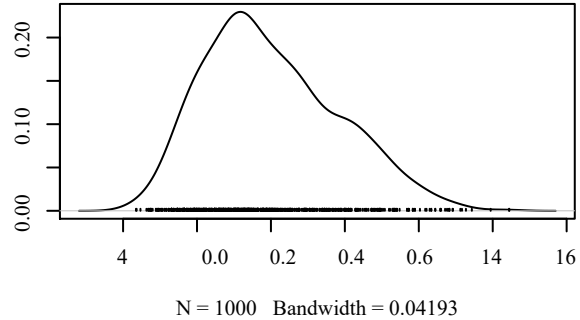

**Trace of beta.alt**

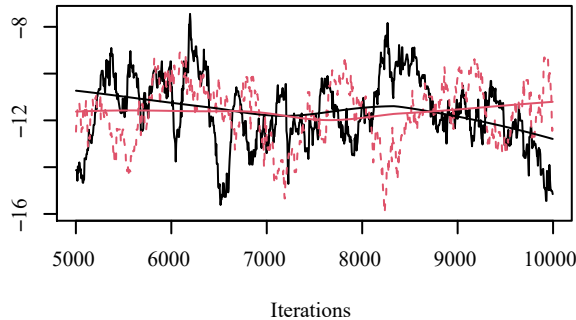

**Density of beta.alt**

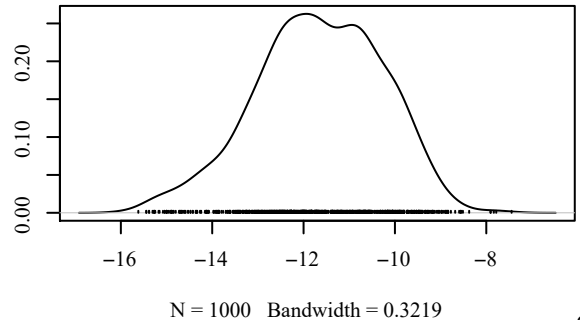

Figure S1: MCMC traceplots

Trace of beta.lc\_modi

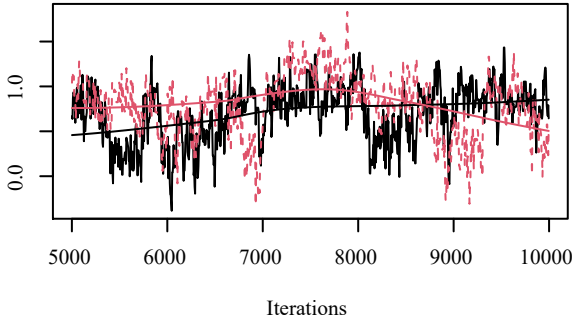

Density of beta.lc\_modi

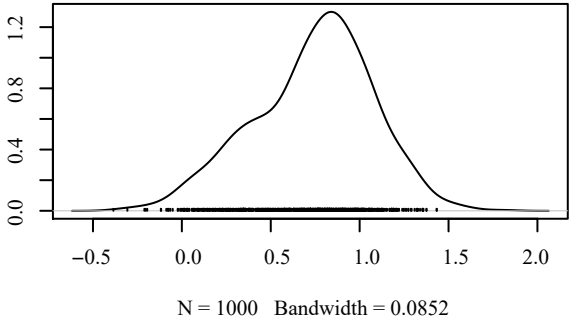

Trace of beta.pop

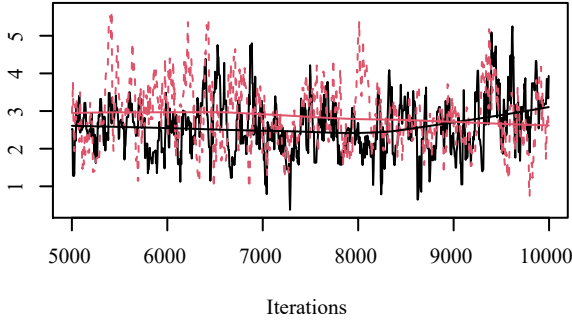

Density of beta.pop\_den

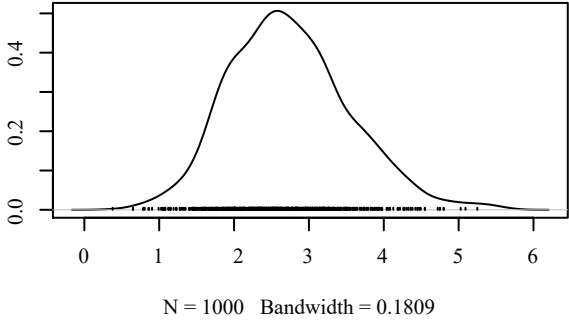

Trace of gamma.(Intercept)

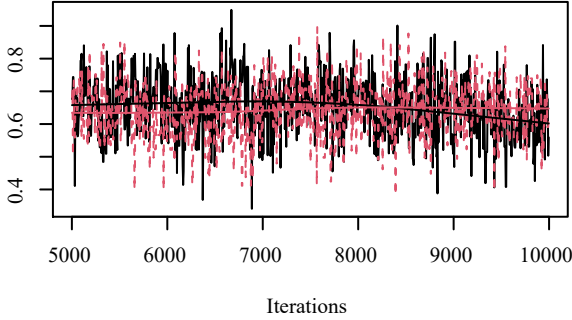

Density of gamma.(Intercept)

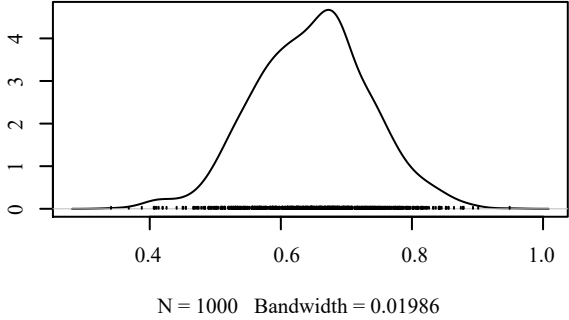

Filoviridae ZIB mcmc traceplot

Figure S1: MCMC  
traceplots

Trace of Deviance

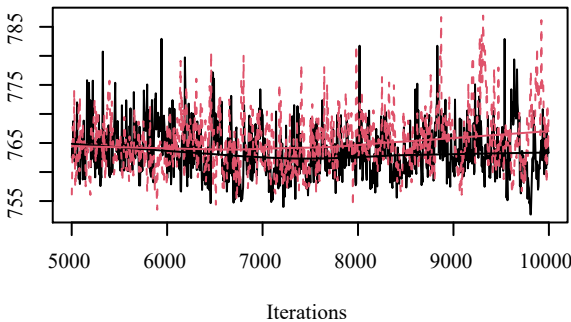

Density of Deviance

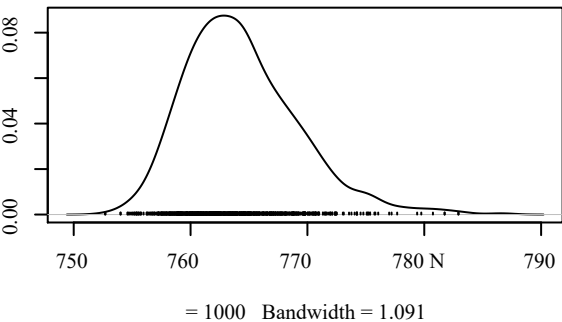



**Trace of beta.(Intercept)**

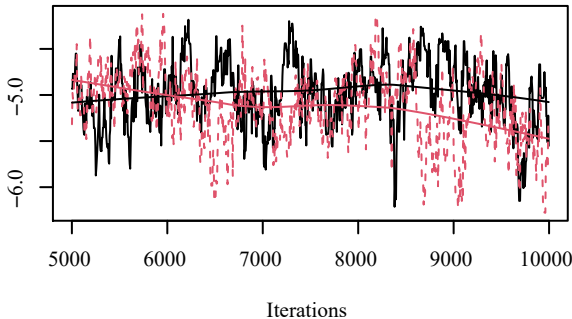

**Density of beta.(Intercept)**

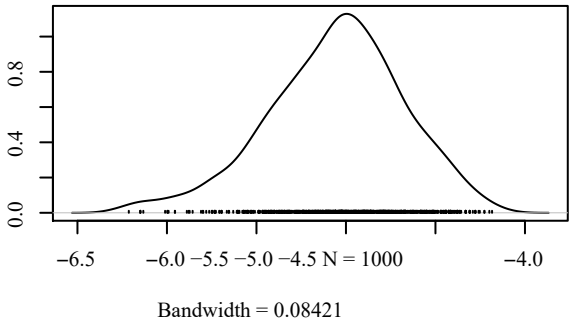

**Trace of beta.layer.1**

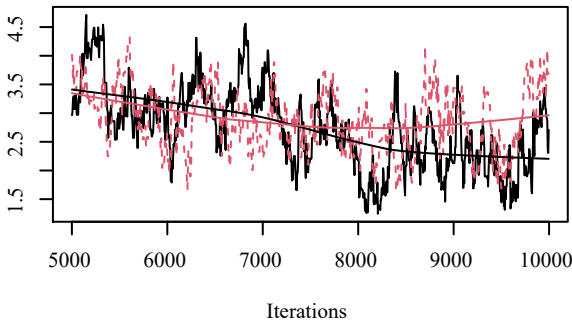

**Density of beta.layer.1**

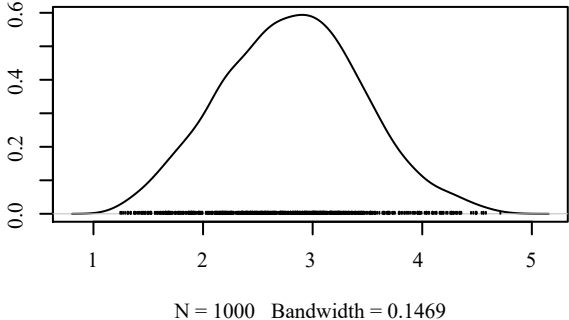

**Trace of beta.layer.2**

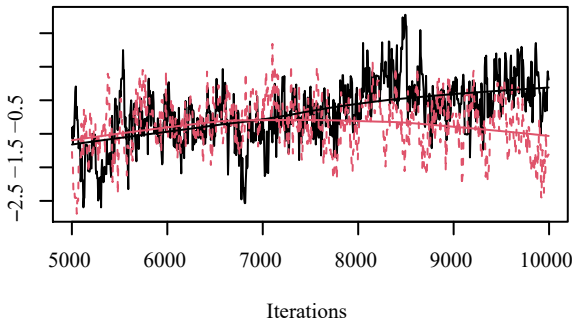

**Density of beta.layer.2**

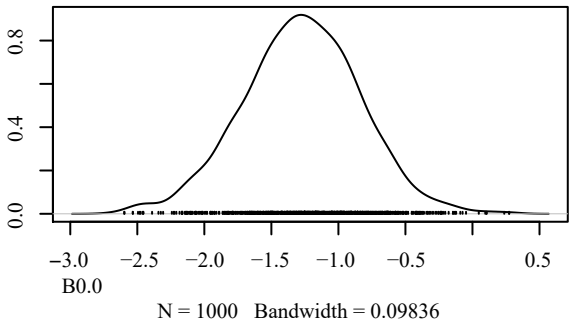

Figure S1: MCMC  
traceplots

**Trace of beta.layer**

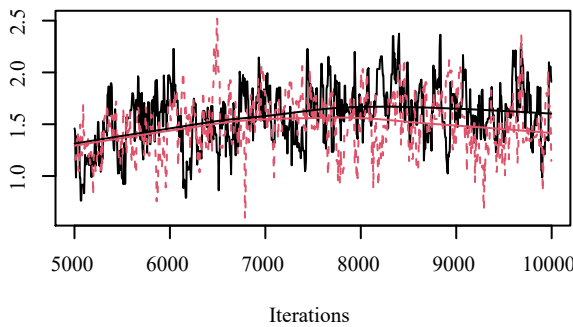

**Density of beta.layer**

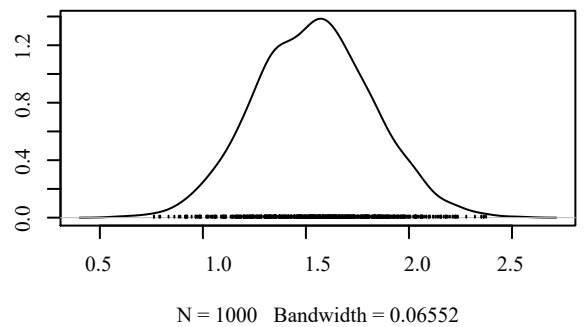

**Trace of beta.lc**

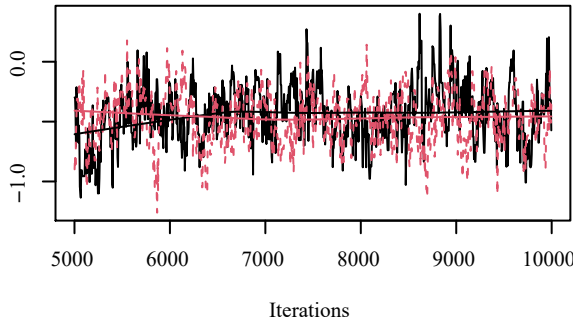

**Density of beta.lc**

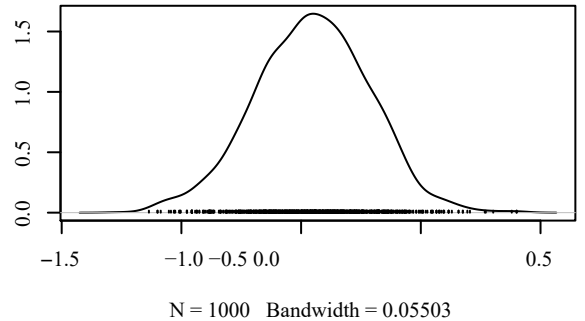

**Trace of beta.alt**

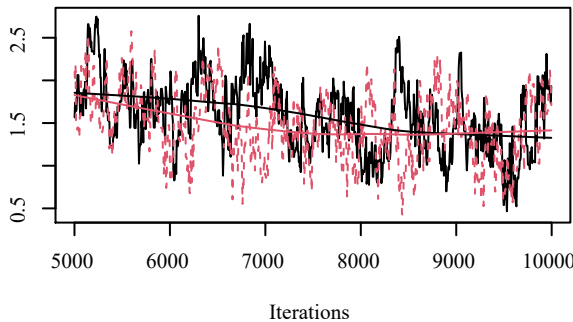

**Density of beta.alt**

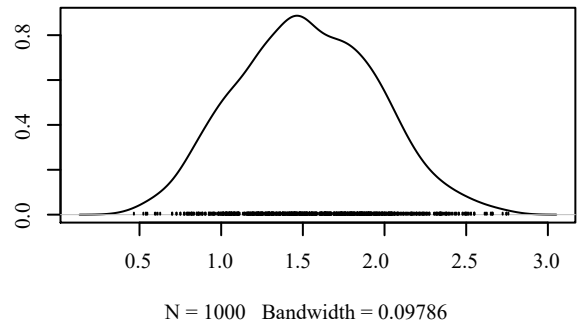

Filoviridae Binomial iCAR memc traceplot

**Trace of beta.lc\_modi**

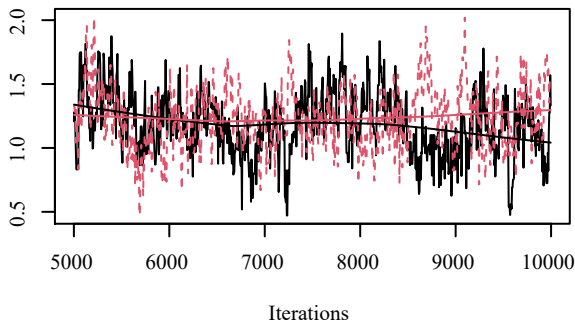

**Density of beta.lc\_modi**

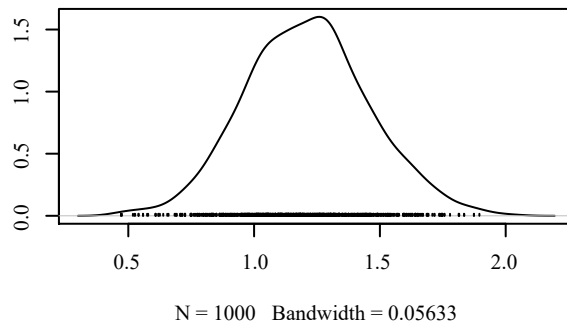

**Trace of beta.pop\_den**

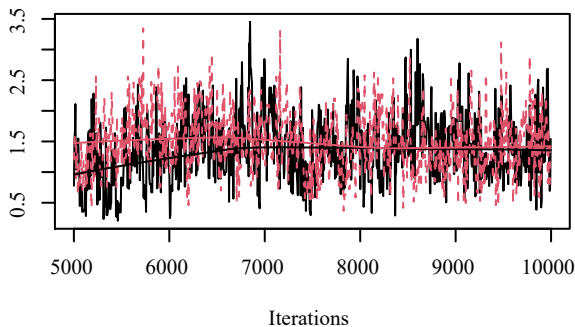

**Density of beta.pop\_den**

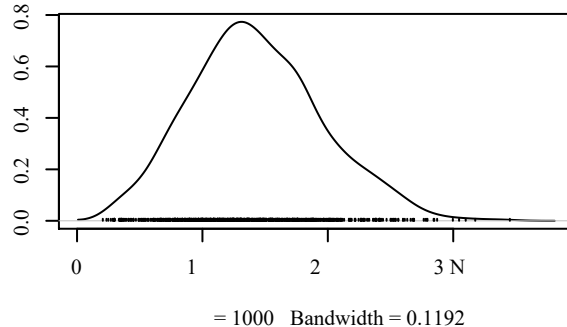

**Trace of Vrho**

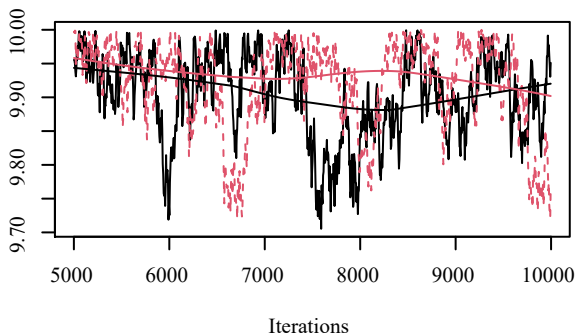

**Density of Vrho**

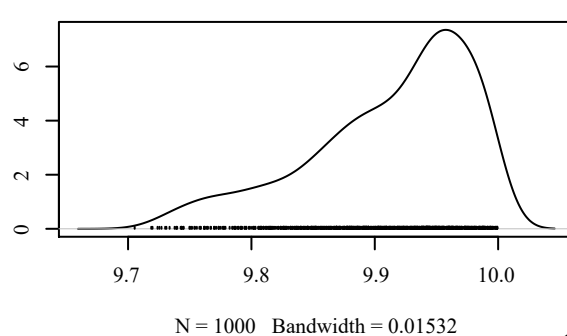

Figure S1: MCMC  
traceplots

Trace of Deviance

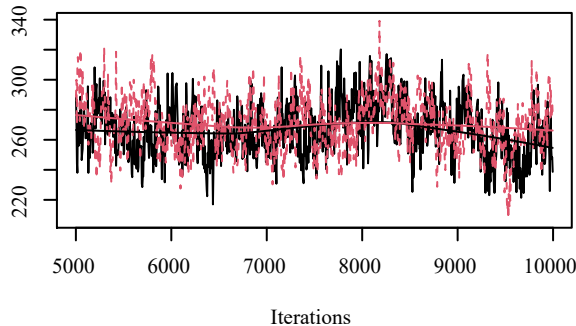

Density of Deviance

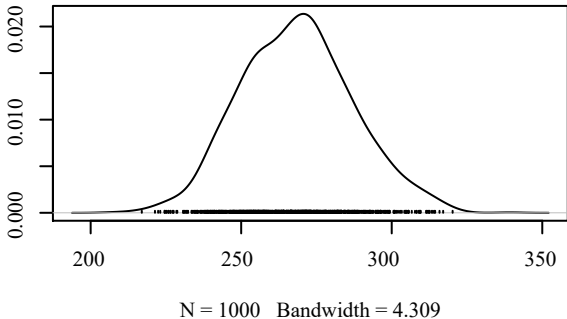

Figure S1: MCMC traceplots

**Trace of beta.(Intercept)**

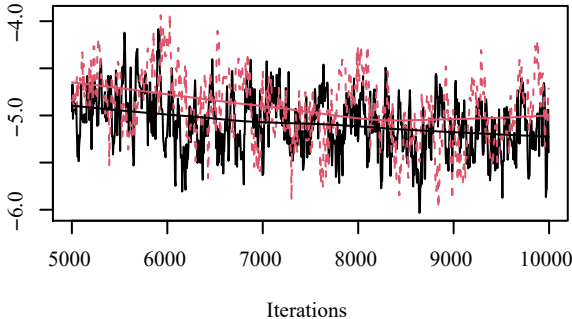

**Density of beta.(Intercept)**

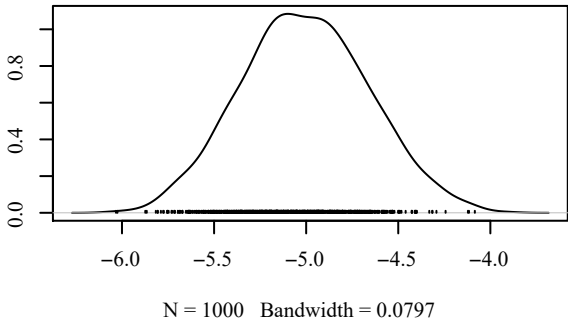

**Trace of beta.layer.1**

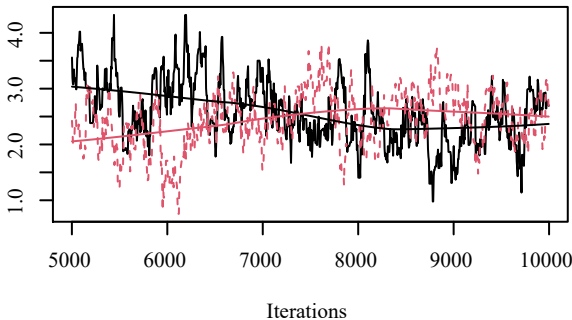

**Density of beta.layer.1**

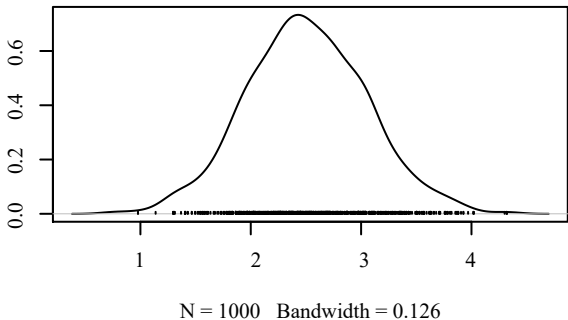

**Trace of beta.layer.2**

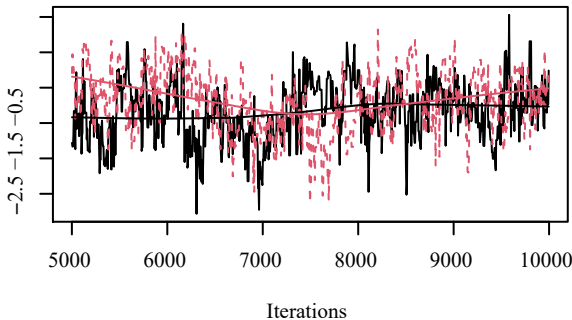

**Density of beta.layer.2**

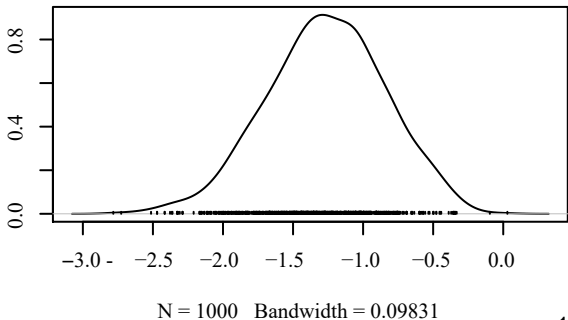

Filoviridae ZIB iCAR memc traceplot

Figure S1: MCMC traceplots

Trace of beta.layer

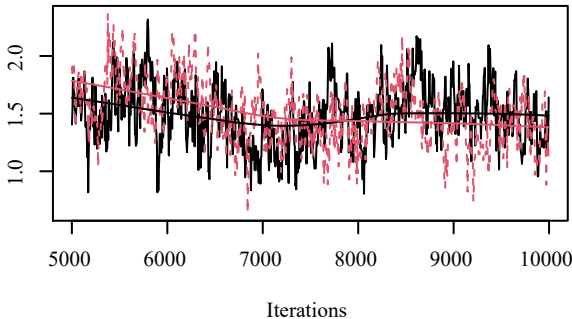

Density of beta.layer

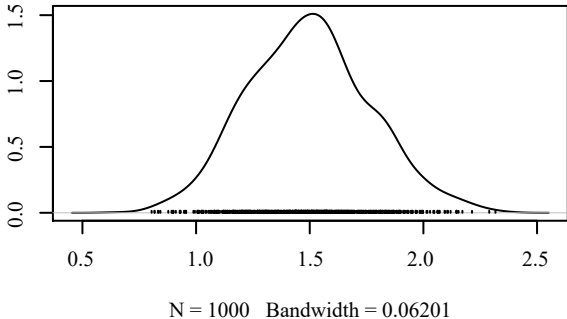

Trace of beta.lc

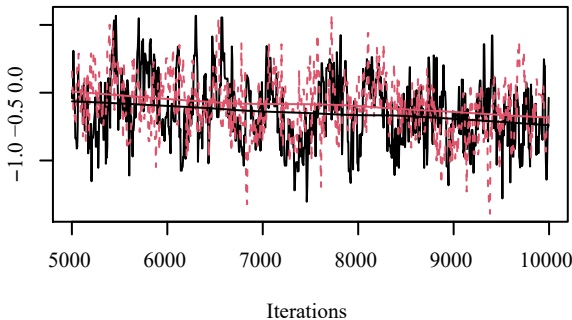

Density of beta.lc

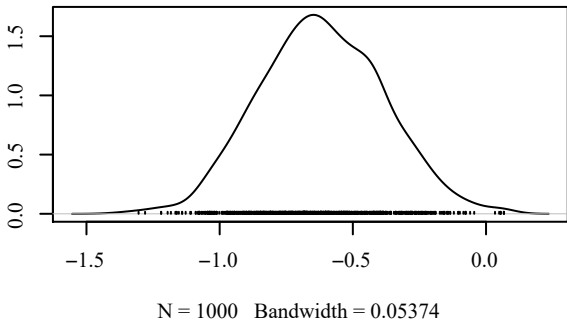

Trace of beta.alt

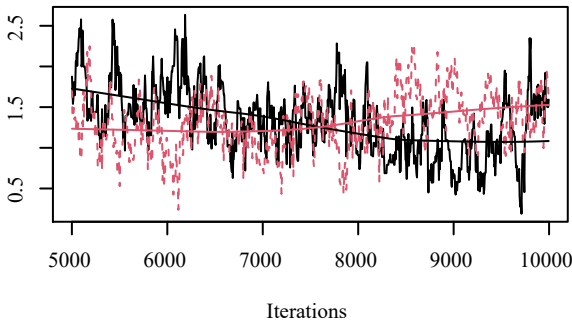

Density of beta.alt

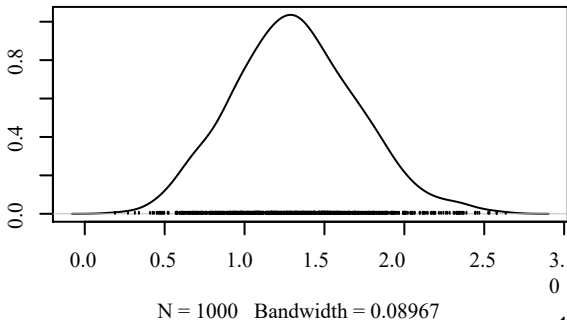

Filoviridae ZIB iCAR mcmc traceplot

Trace of beta.lc\_modi

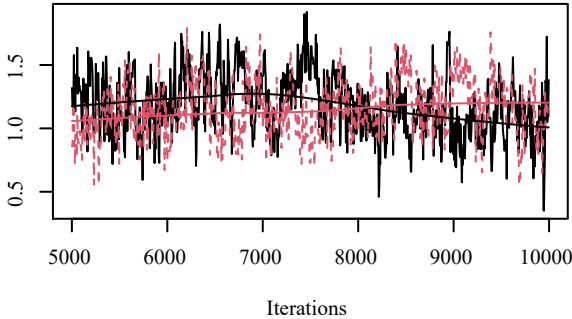

Density of beta.lc\_modi

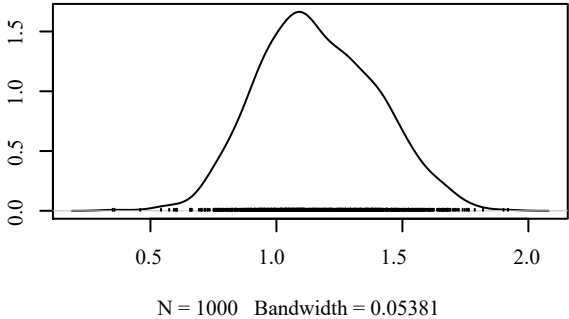

Trace of beta.pop\_den

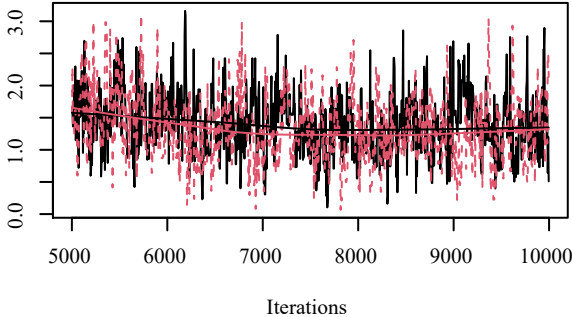

Density of beta.pop\_den

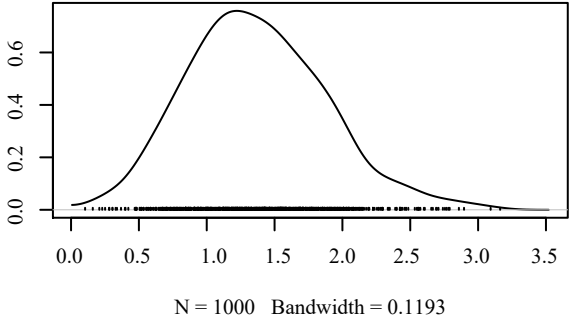

Trace of gamma.(Intercept)

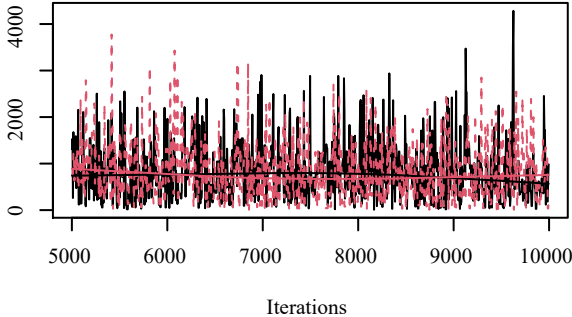

Density of gamma.(Intercept)

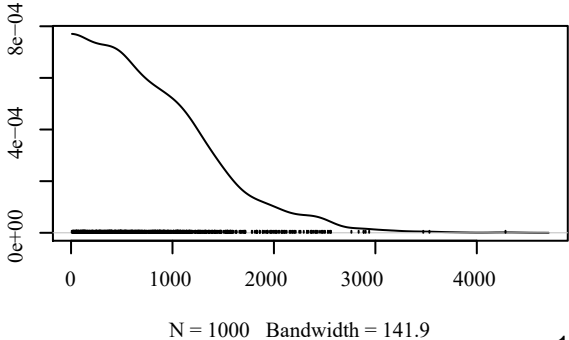

**Trace of Vrho**

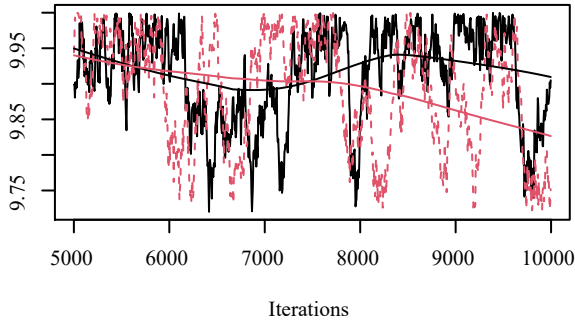

**Density of Vrho**

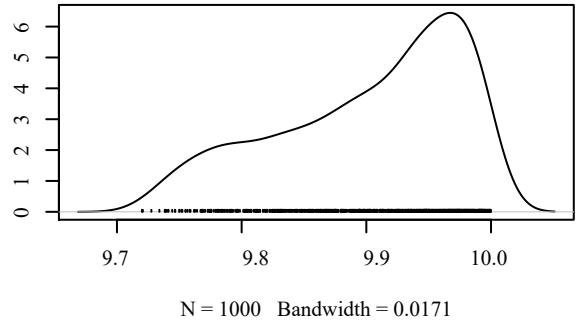

**Trace of Deviance**

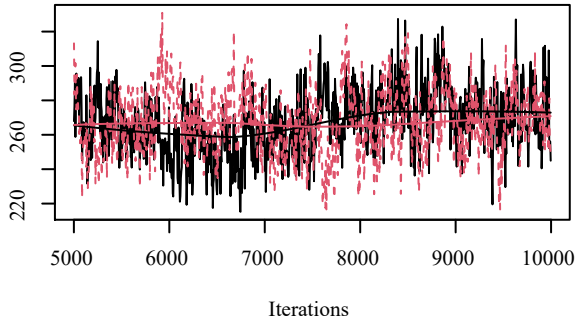

**Density of Deviance**

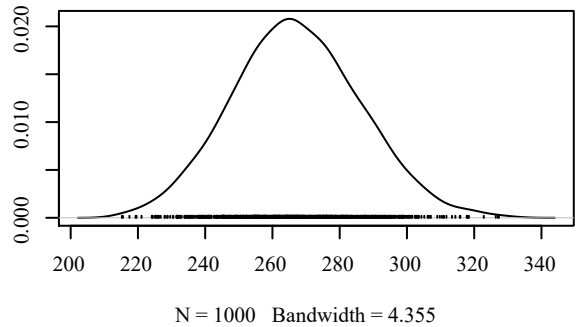



Figure S1: MCMC  
traceplots

**Trace of beta.(Intercept)**

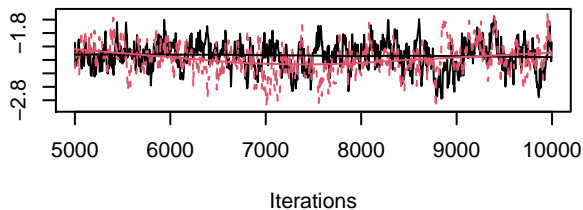

**Density of beta.(Intercept)**

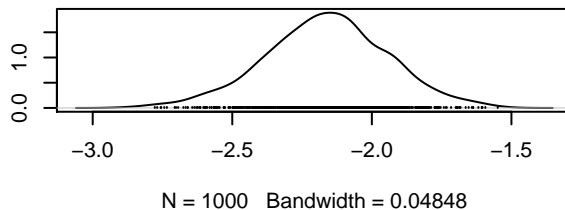

**Trace of beta.layer.1**

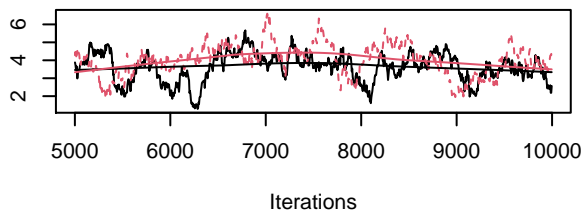

**Density of beta.layer.1**

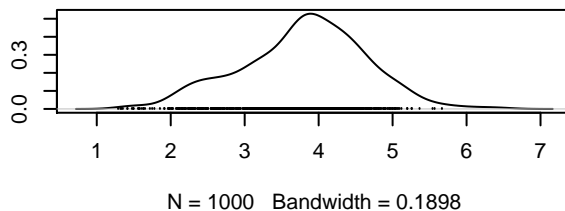

**Trace of beta.layer.2**

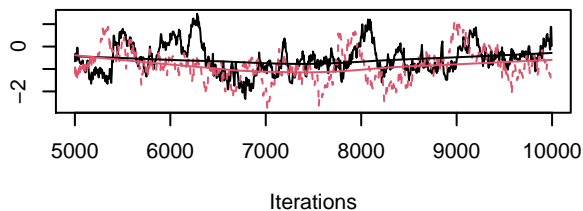

**Density of beta.layer.2**

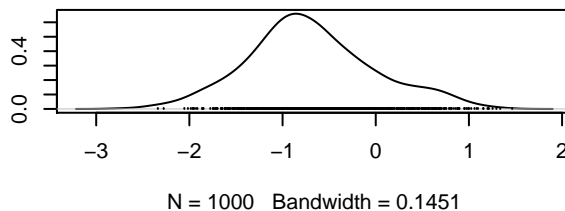

**Trace of beta.layer**

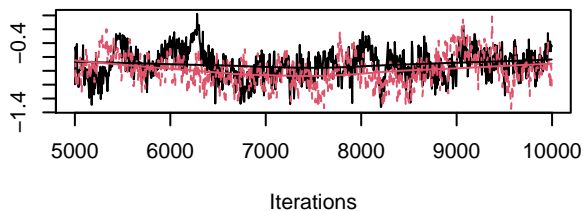

**Density of beta.layer**

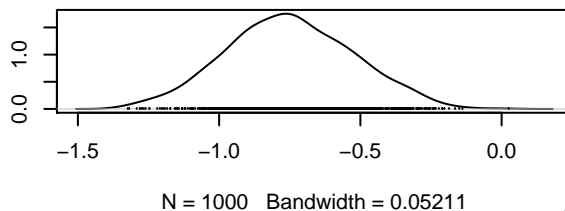

Figure S1: MCMC traceplots

Trace of beta.lc

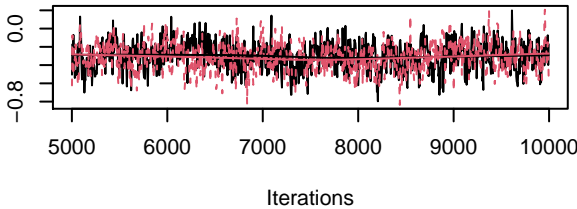

Density of beta.lc

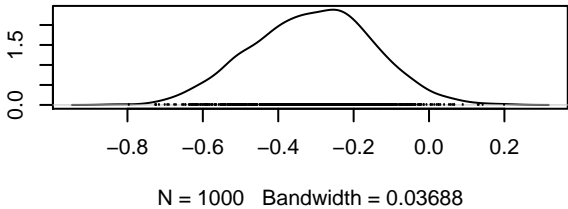

Trace of beta.alt

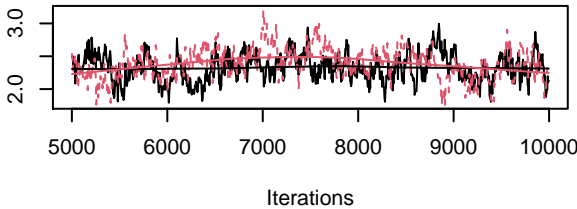

Density of beta.alt

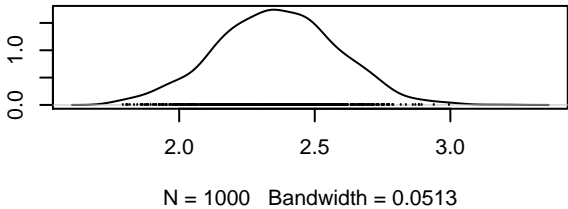

Trace of beta.lc\_modi

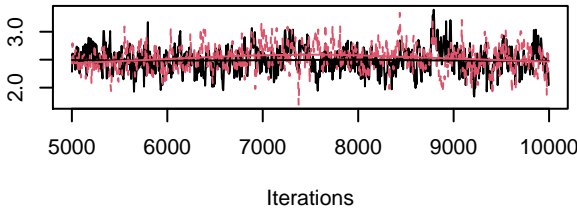

Density of beta.lc\_modi

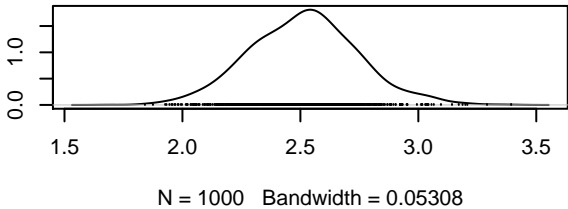

Trace of beta.pop\_den

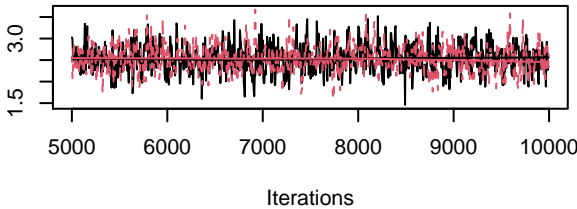

Density of beta.pop\_den

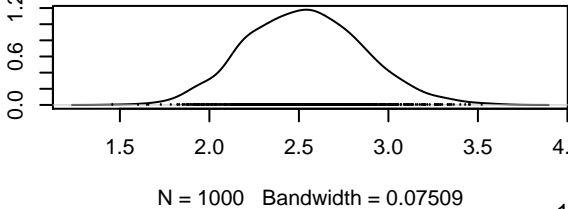

Figure S1: MCMC  
traceplots

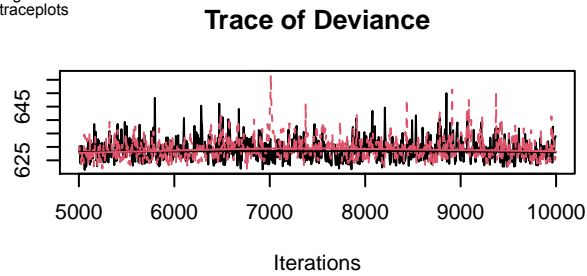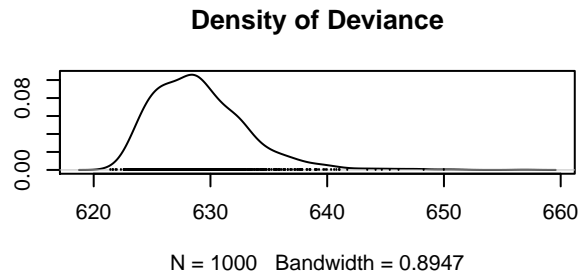

**Trace of beta.(Intercept)**

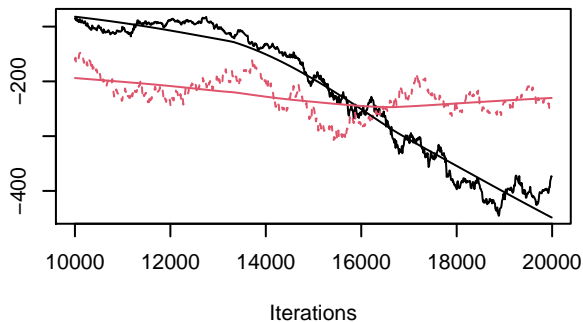

**Density of beta.(Intercept)**

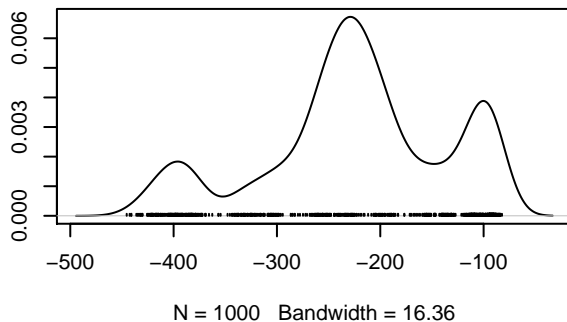

**Trace of beta.layer.1**

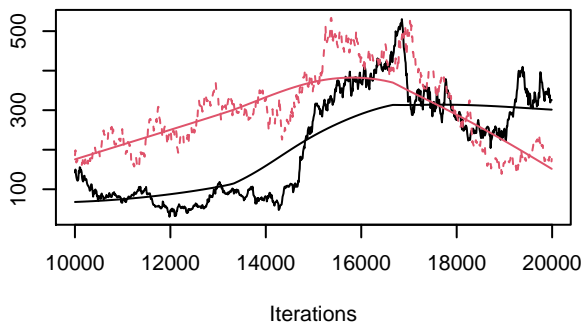

**Density of beta.layer.1**

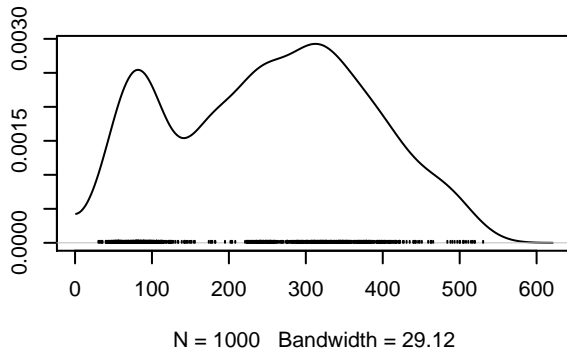

**Trace of beta.layer.2**

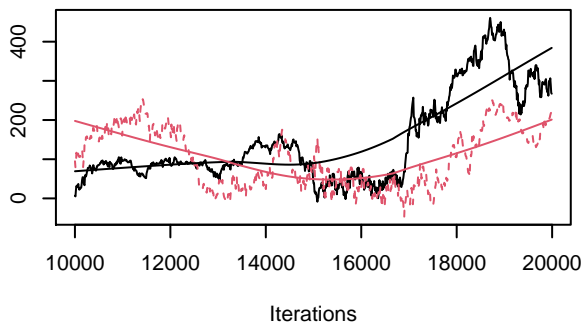

**Density of beta.layer.2**

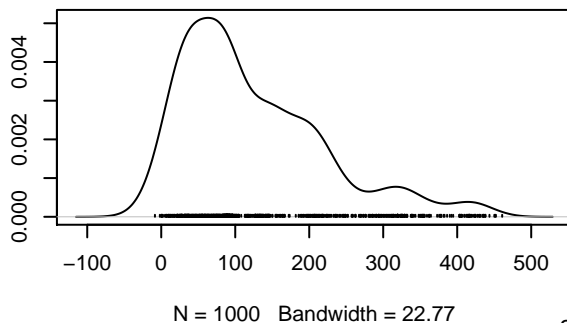

**Trace of beta.layer**

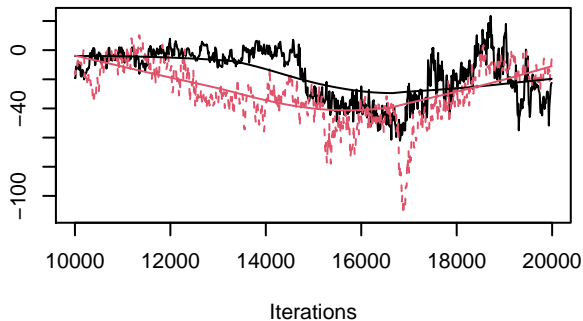

**Density of beta.layer**

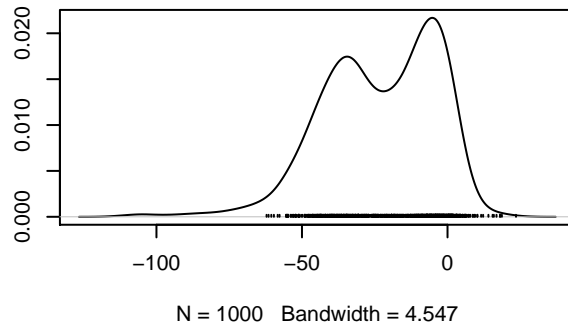

**Trace of beta.lc**

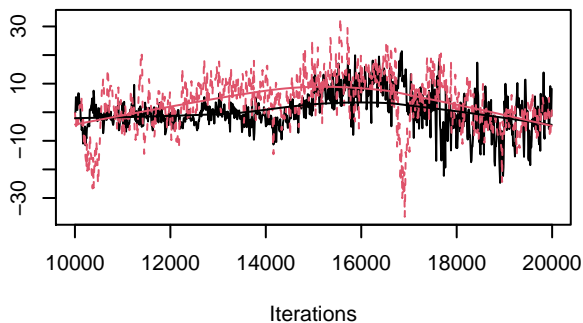

**Density of beta.lc**

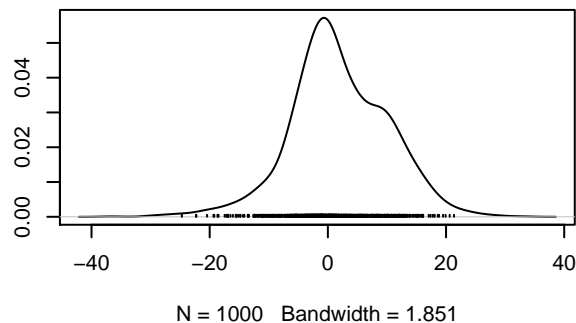

**Trace of beta.alt**

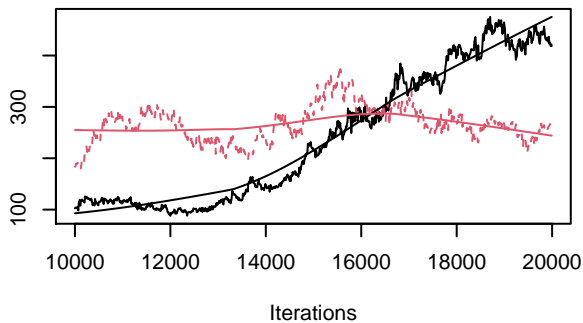

**Density of beta.alt**

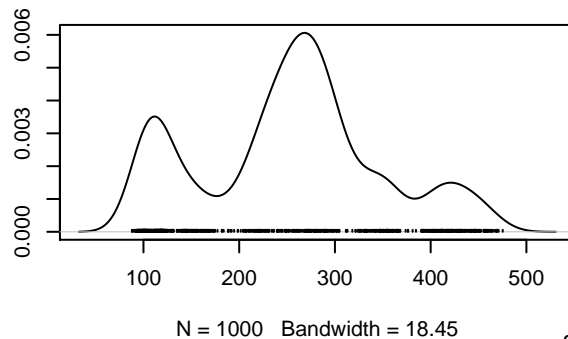

Trace of beta.lc\_modi

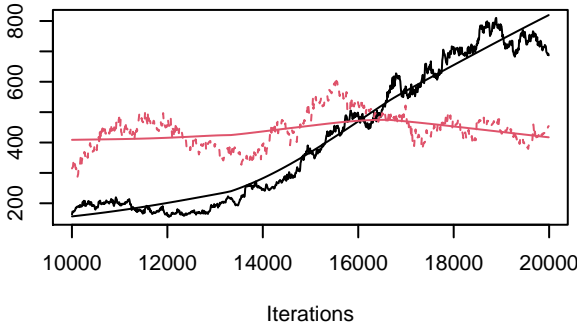

Density of beta.lc\_modi

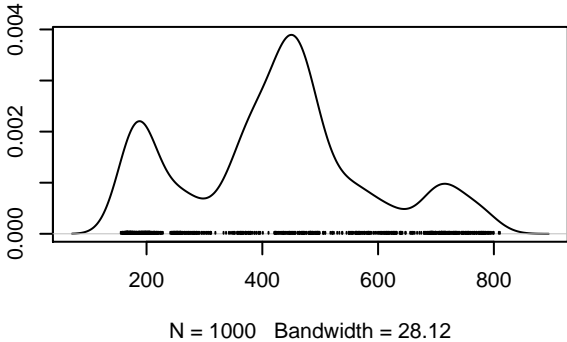

Trace of beta.pop\_den

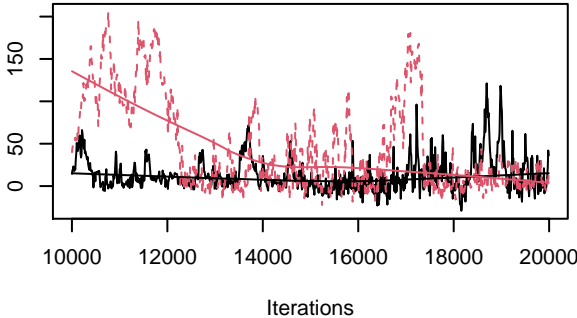

Density of beta.pop\_den

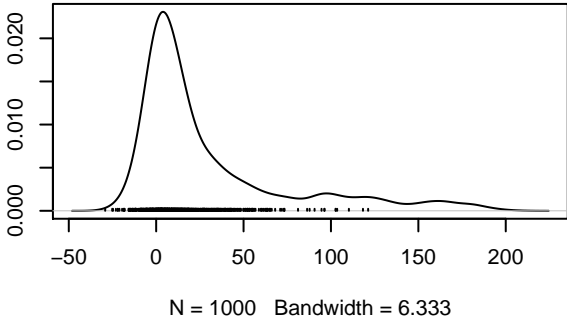

Trace of gamma.(Intercept)

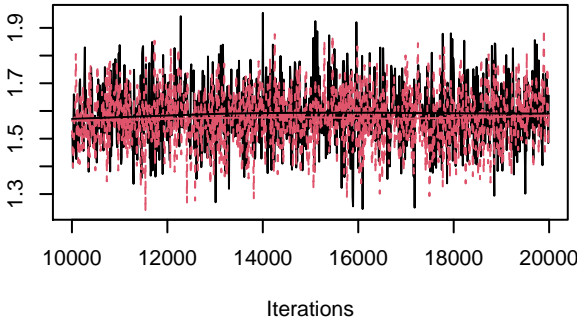

Density of gamma.(Intercept)

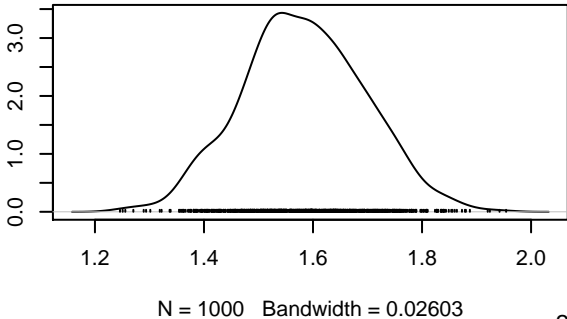

Figure S1: MCMC  
traceplots

Trace of Deviance

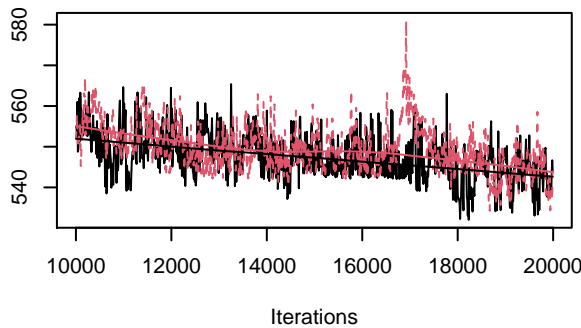

Density of Deviance

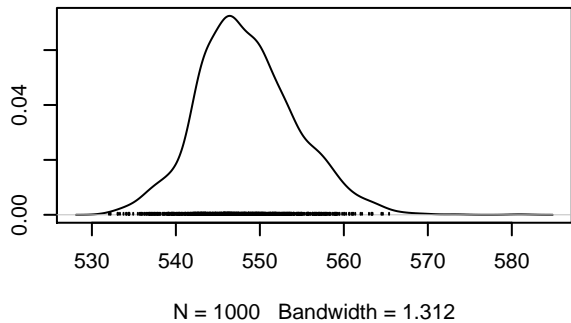

Trace of beta.(Intercept)

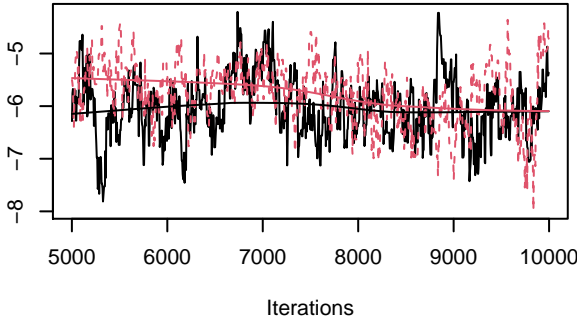

Density of beta.(Intercept)

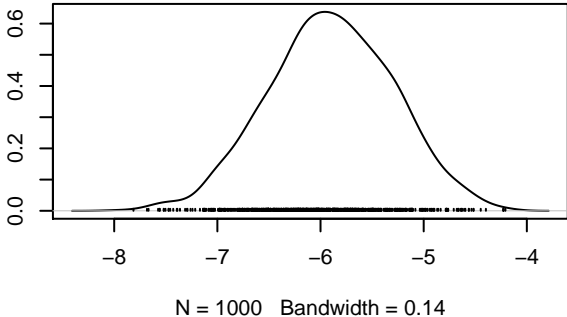

Trace of beta.layer.1

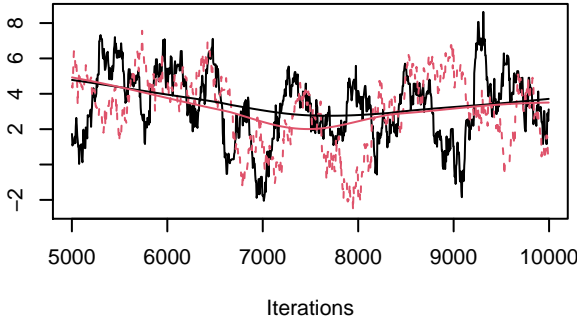

Density of beta.layer.1

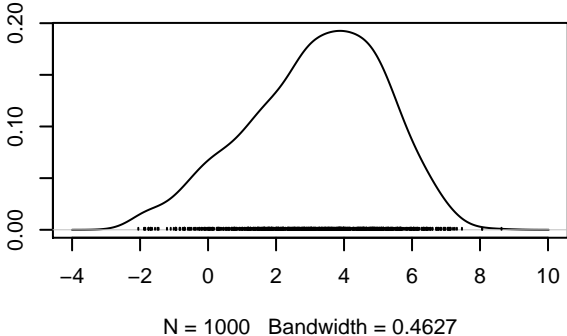

Trace of beta.layer.2

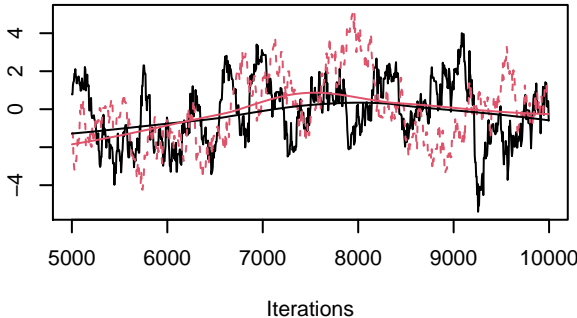

Density of beta.layer.2

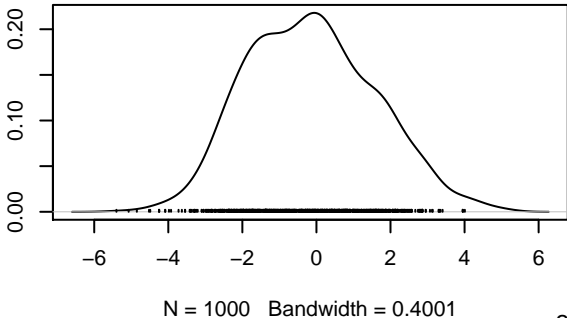



**Trace of beta.layer**

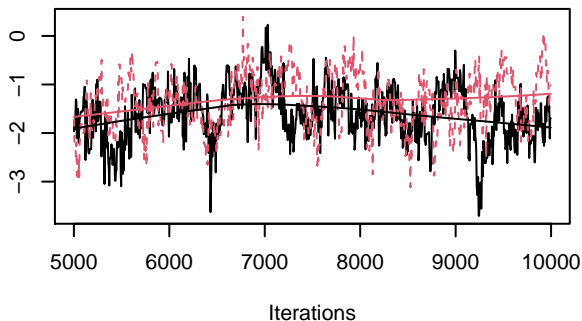

**Density of beta.layer**

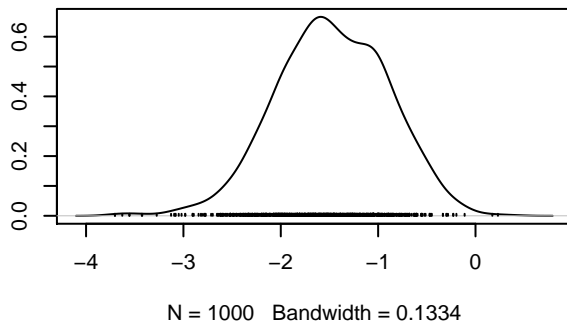

**Trace of beta.lc**

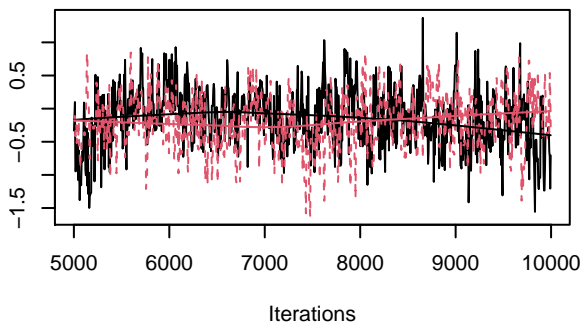

**Density of beta.lc**

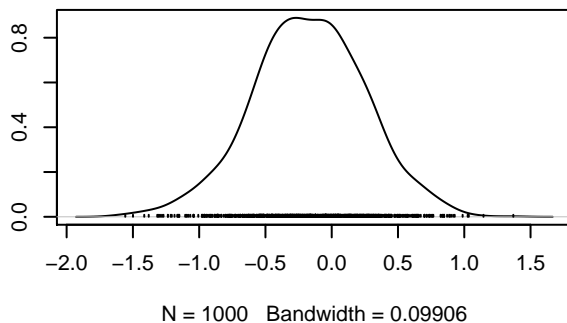

**Trace of beta.alt**

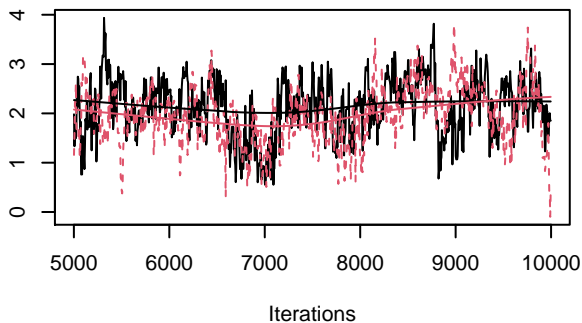

**Density of beta.alt**

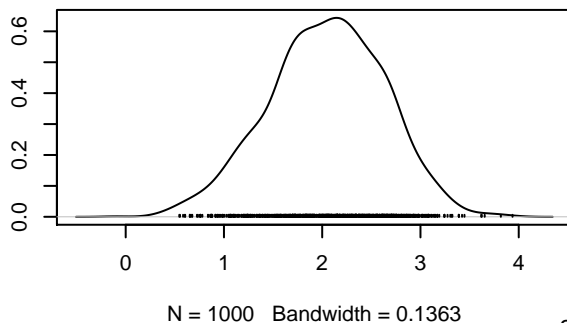

**Trace of beta.lc\_modi**

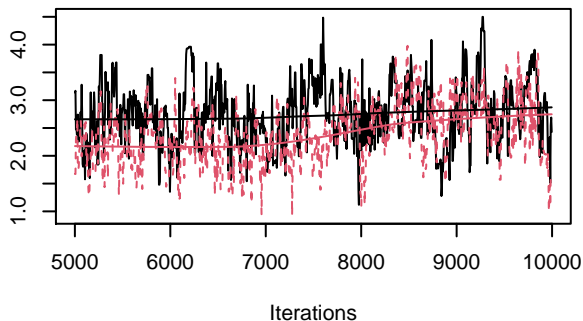

**Density of beta.lc\_modi**

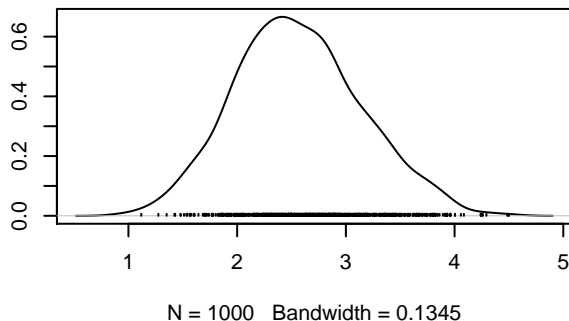

**Trace of beta.pop\_den**

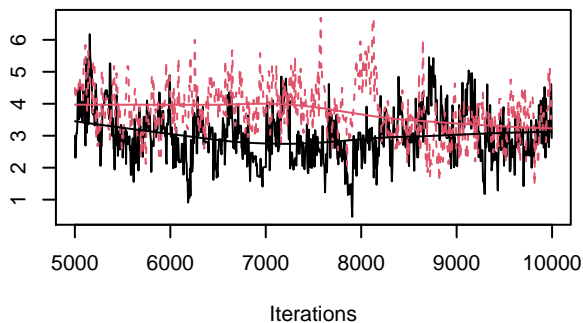

**Density of beta.pop\_den**

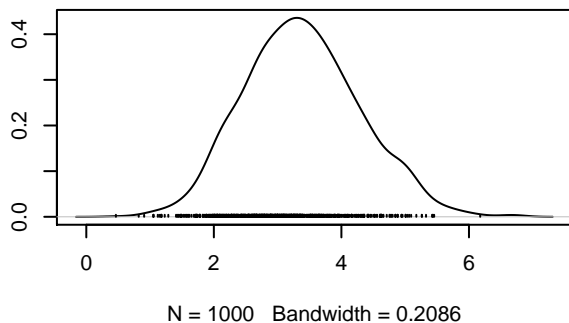

**Trace of Vrho**

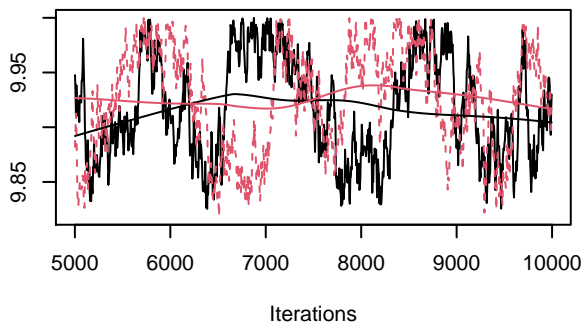

**Density of Vrho**

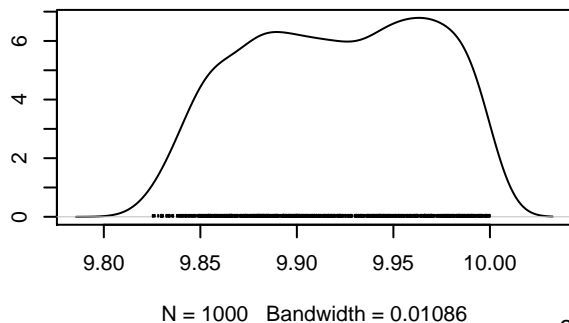

**Trace of Deviance**

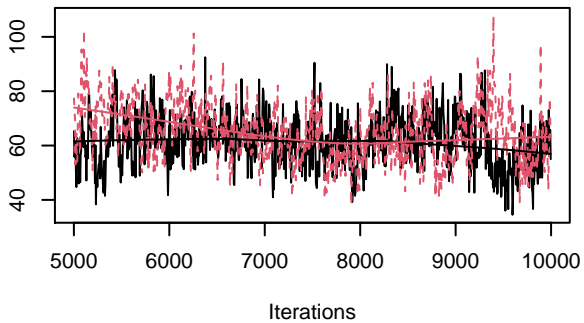

**Density of Deviance**

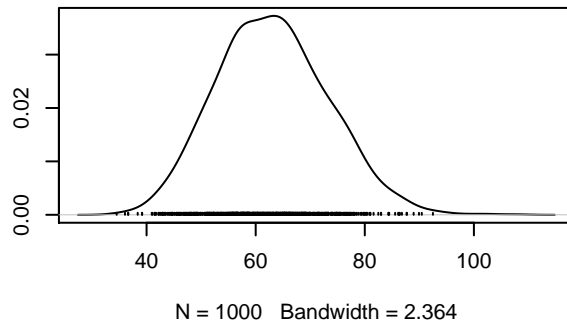

Figure S1: MCMC traceplots

Trace of beta.(Intercept)

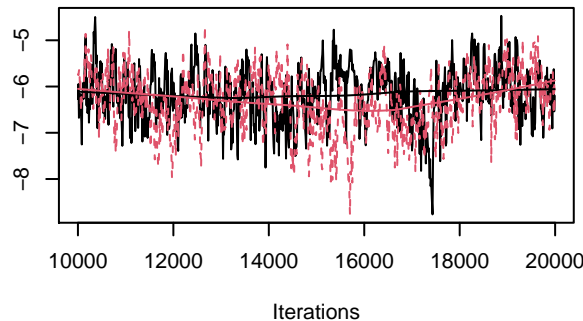

Density of beta.(Intercept)

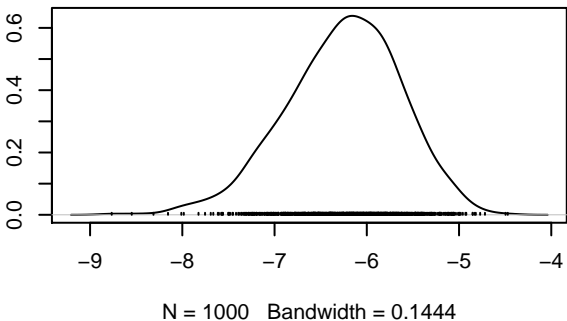

Trace of beta.layer.1

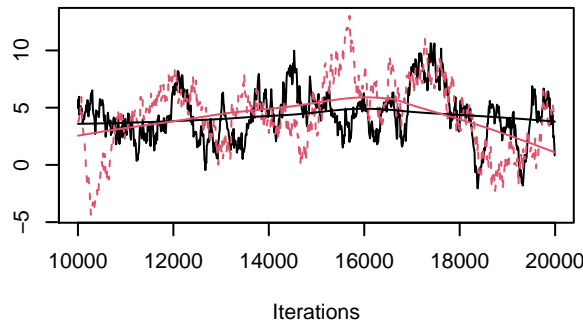

Density of beta.layer.1

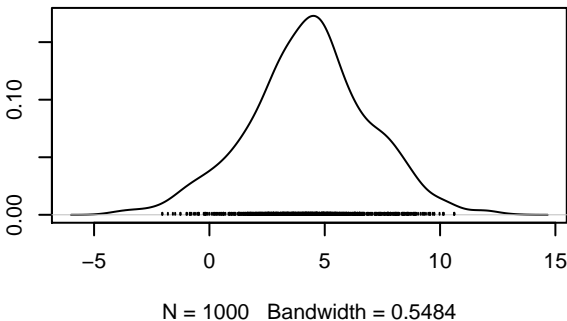

Trace of beta.layer.2

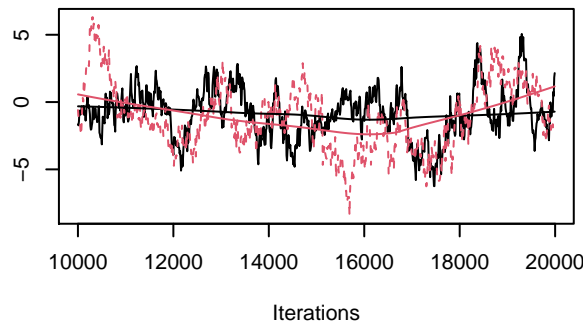

Density of beta.layer.2

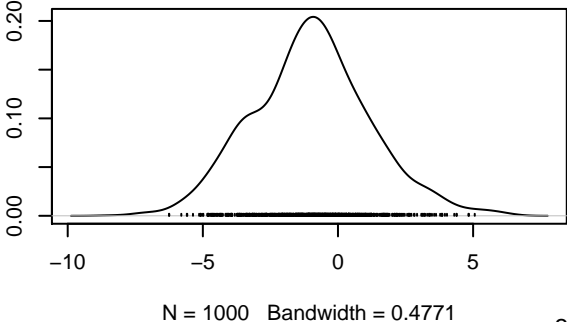

**Trace of beta.layer**

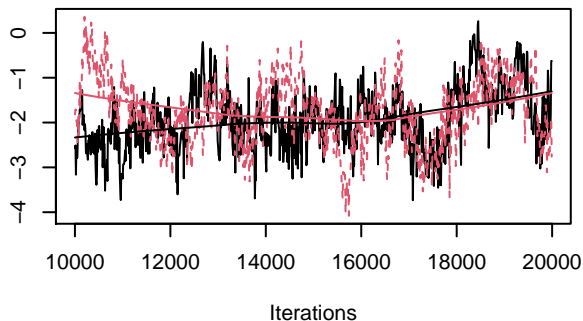

**Density of beta.layer**

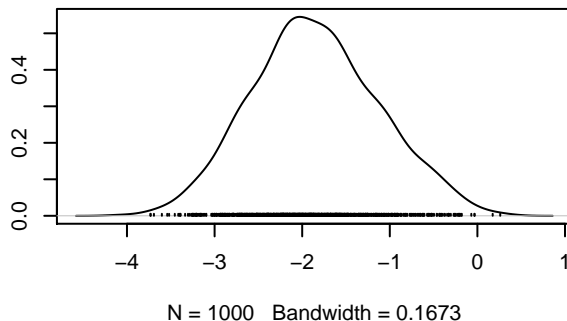

**Trace of beta.lc**

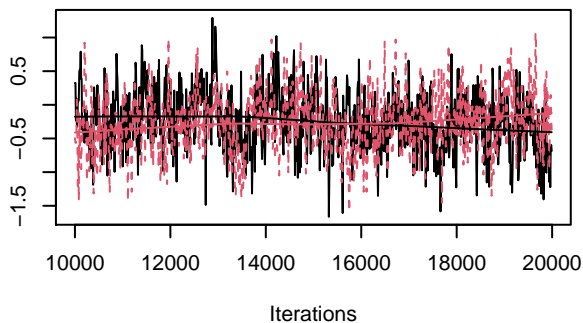

**Density of beta.lc**

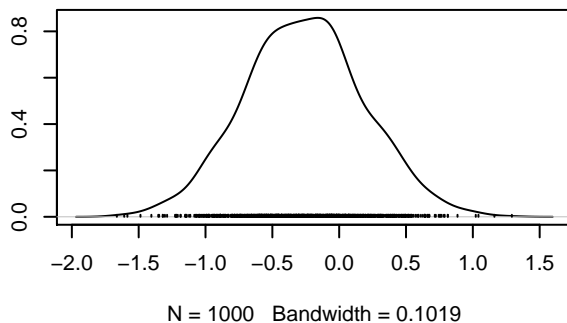

**Trace of beta.alt**

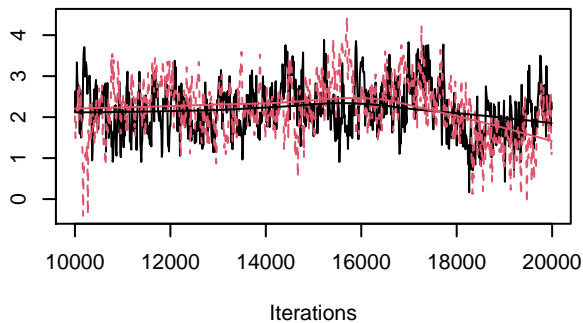

**Density of beta.alt**

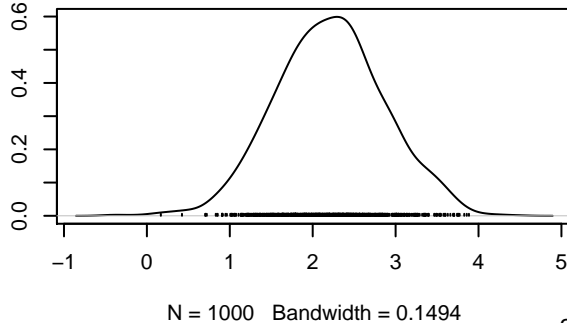

Trace of beta.lc\_modi

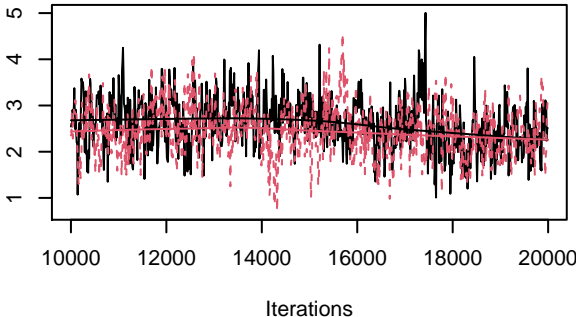

Density of beta.lc\_modi

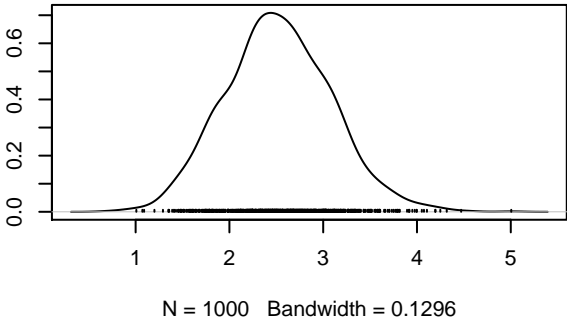

Trace of beta.pop\_den

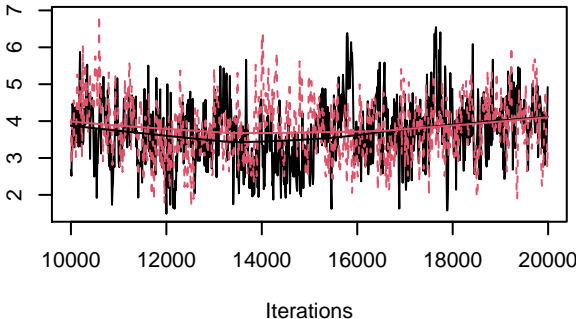

Density of beta.pop\_den

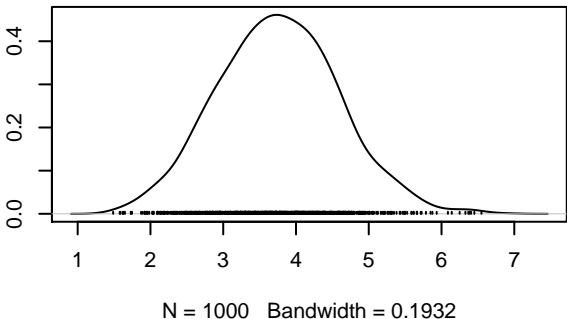

Trace of gamma.(Intercept)

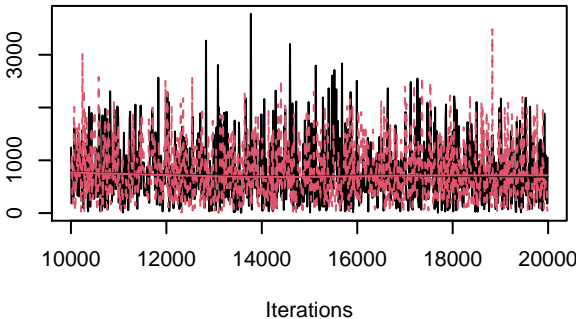

Density of gamma.(Intercept)

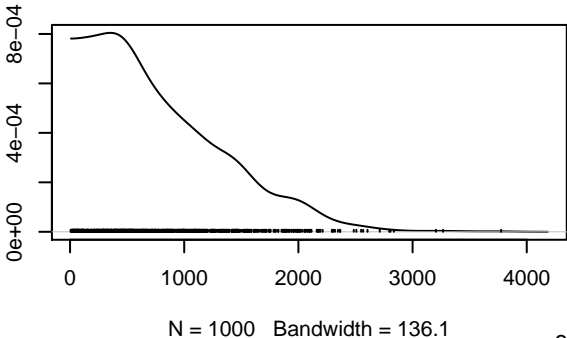

Figure S1: MCMC  
traceplots

Trace of Vrho

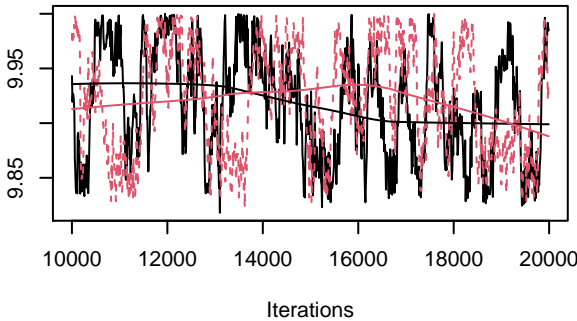

Density of Vrho

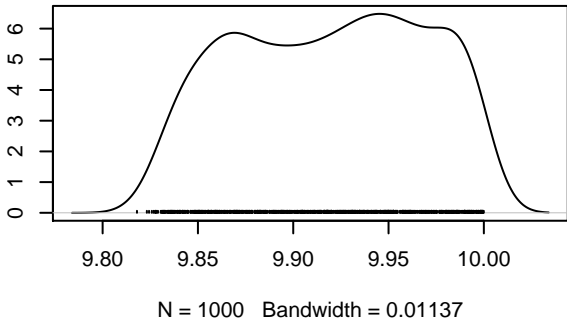

Trace of Deviance

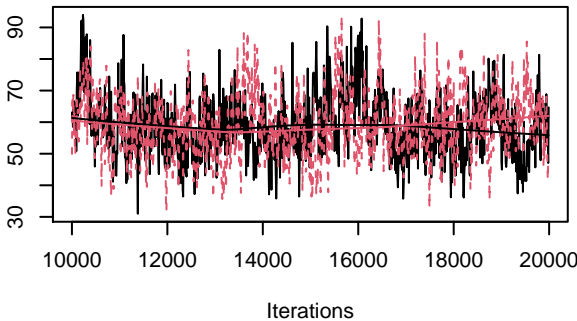

Density of Deviance

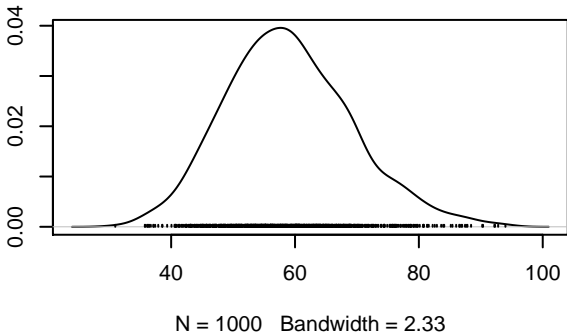

Figure S1: MCMC  
traceplots

Trace of beta.(Intercept)

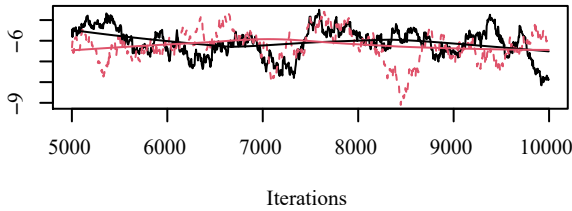

Density of beta.(Intercept)

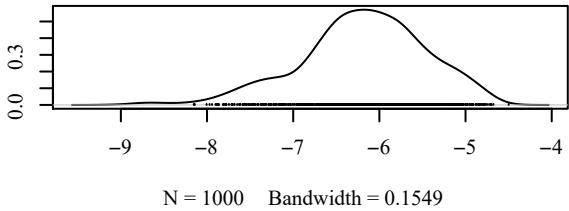

Trace of beta.layer.1

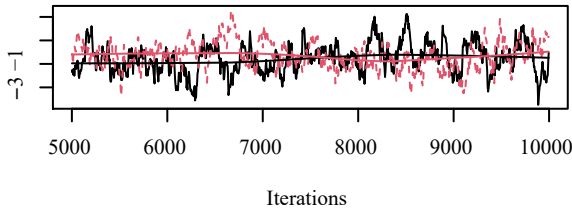

Density of beta.layer.1

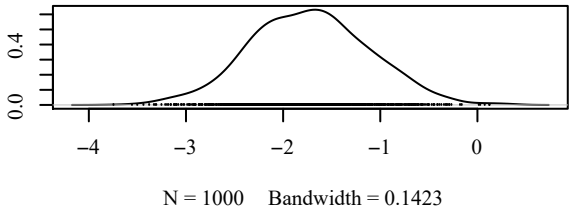

Trace of beta.layer.2

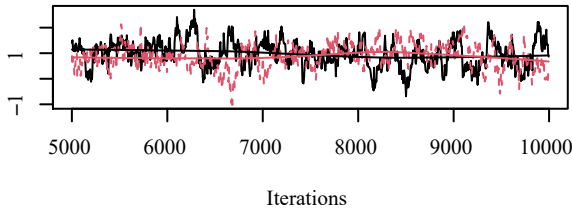

Density of beta.layer.2

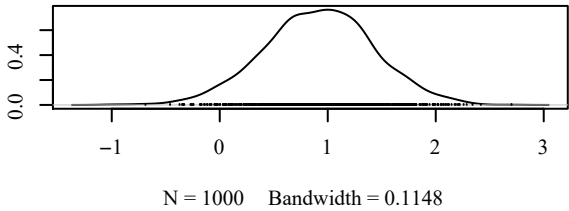

Trace of beta.layer

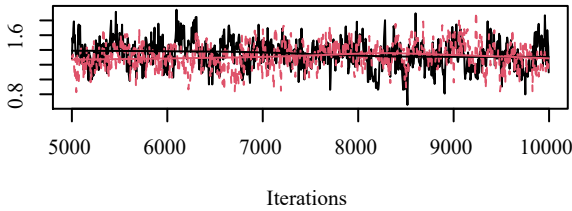

Density of beta.layer

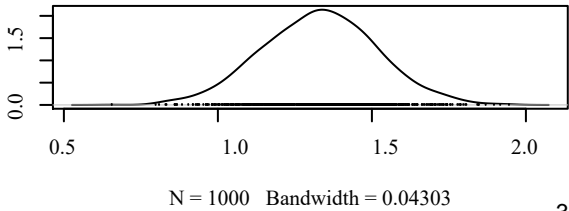



Figure S1: MCMC traceplots

Trace of beta.lc

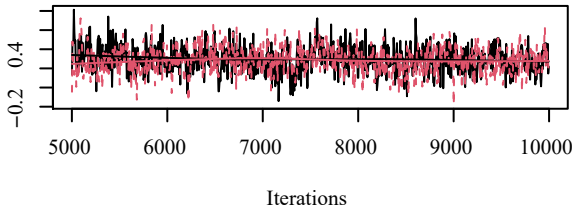

Density of beta.lc

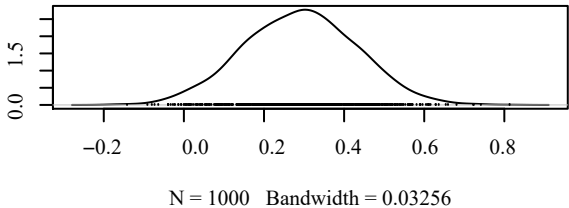

Trace of beta.alt

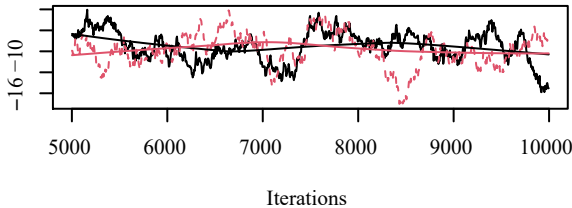

Density of beta.alt

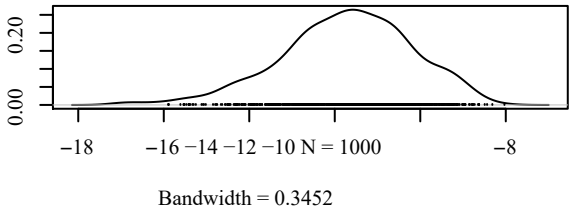

Trace of beta.lc\_modi

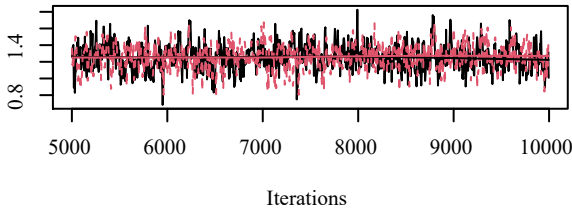

Density of beta.lc\_modi

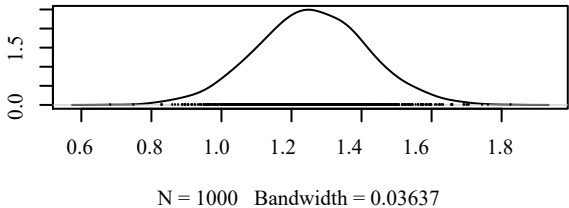

Trace of beta.pop\_den

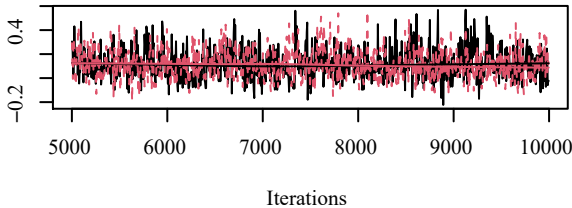

Density of beta.pop\_den

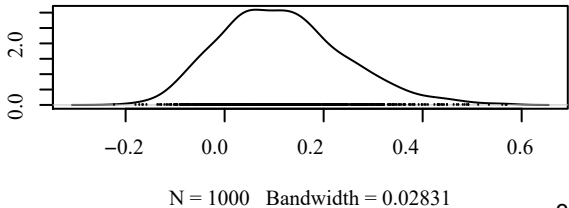

Henipavirus Binomial mcmc traceplot

Figure S1: MCMC traceplots

Trace of Deviance

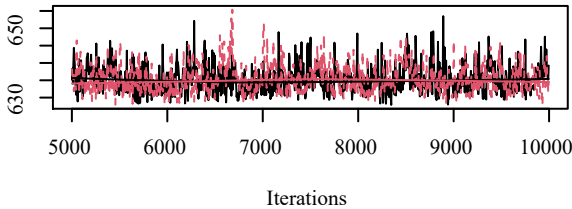

Density of Deviance

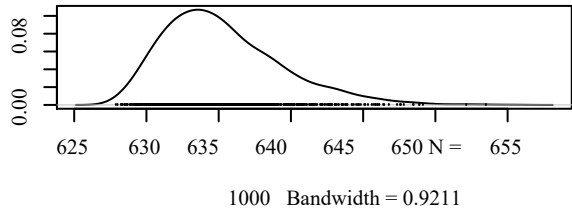

Figure S1: MCMC traceplots

Trace of beta.(Intercept)

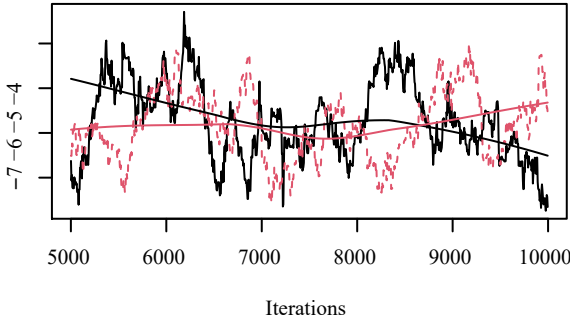

Density of beta.(Intercept)

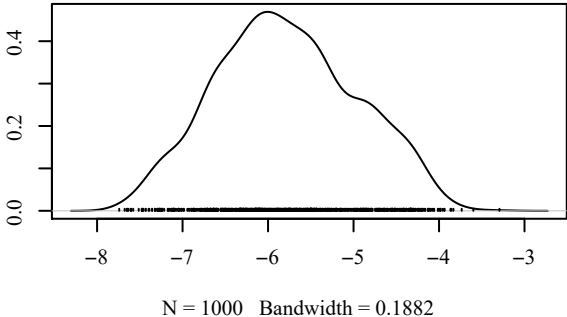

Trace of beta.layer.1

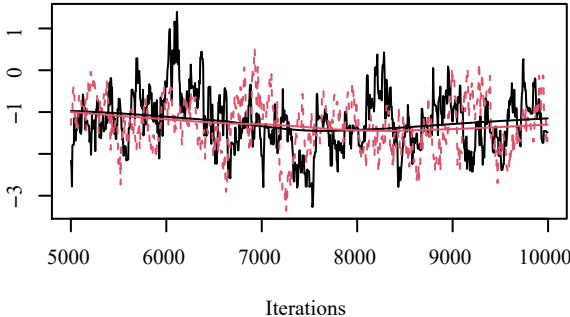

Density of beta.layer.1

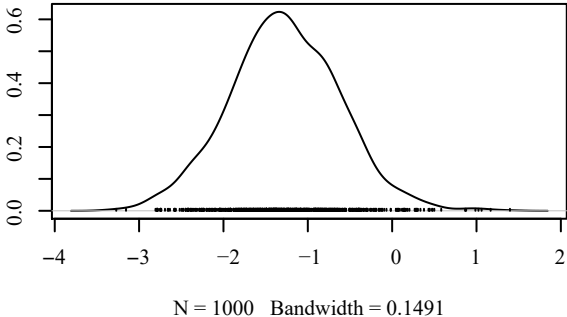

Trace of beta.layer.2

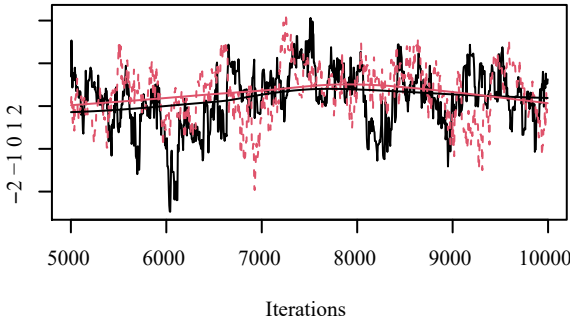

Density of beta.layer.2

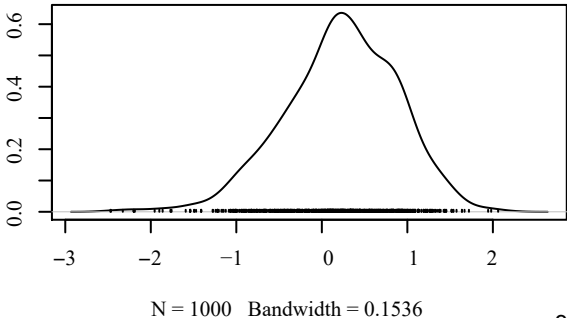

Figure S1: MCMC  
traceplots

**Trace of beta.layer**

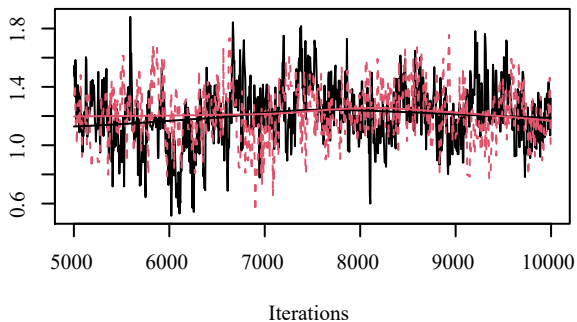

**Density of beta.layer**

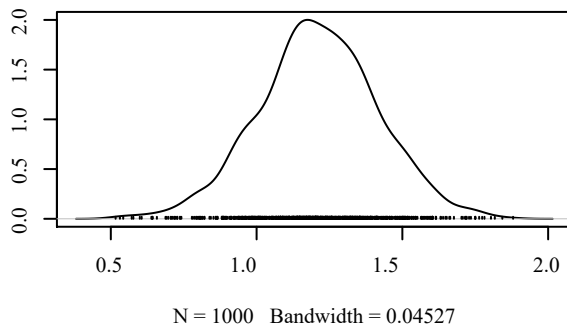

**Trace of beta.lc**

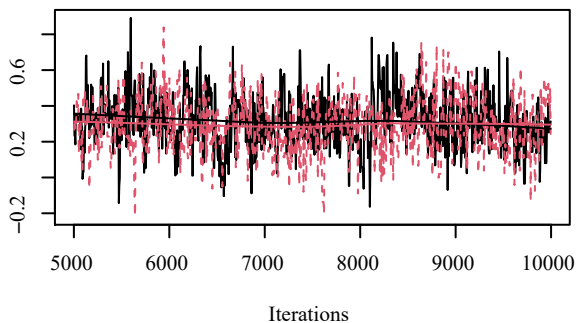

**Density of beta.lc**

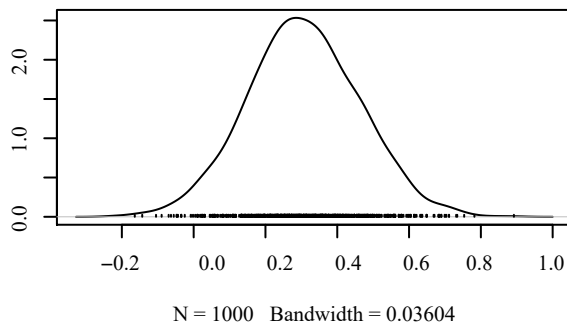

**Trace of beta.alt**

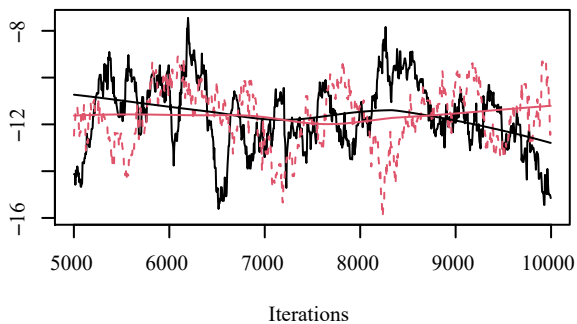

**Density of beta.alt**

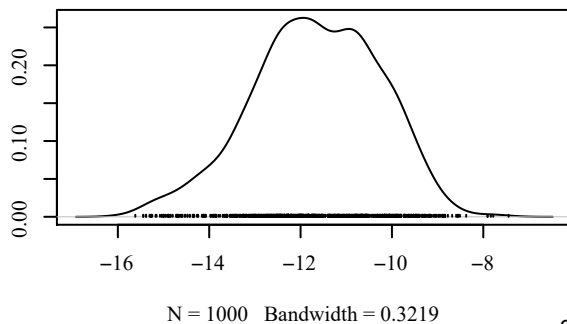

Figure S1: MCMC  
traceplots

**Trace of beta.lc\_modi**

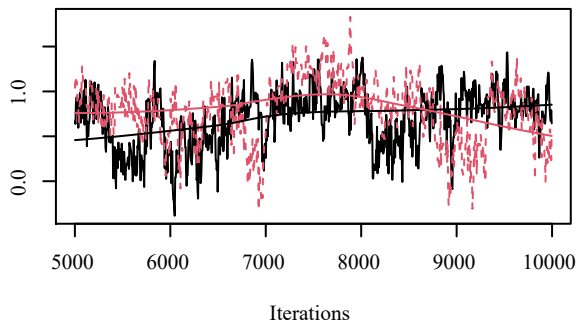

**Density of beta.lc\_modi**

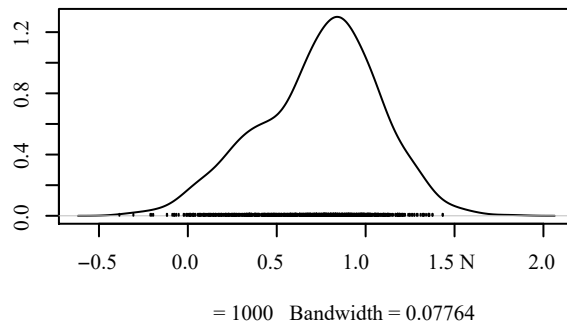

**Trace of beta.pop\_den**

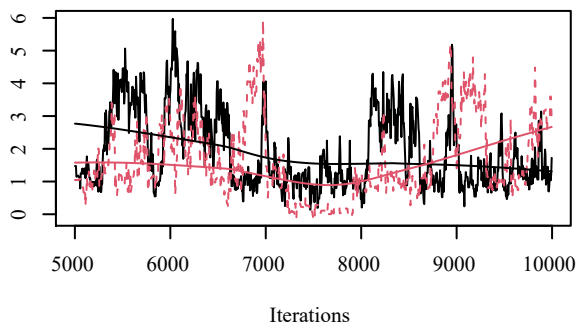

**Density of beta.pop\_den**

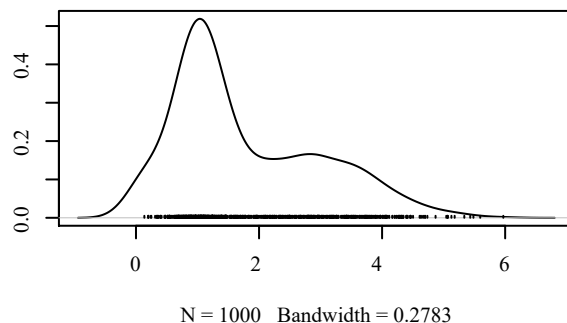

**Trace of gamma.(Intercept)**

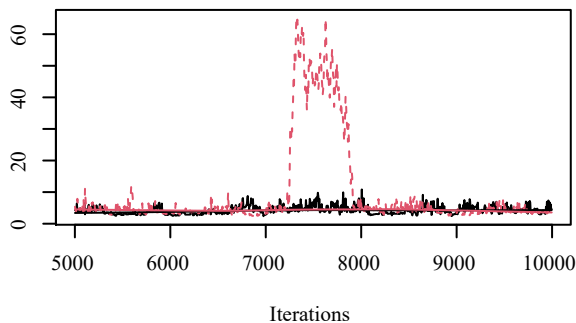

**Density of gamma.(Intercept)**

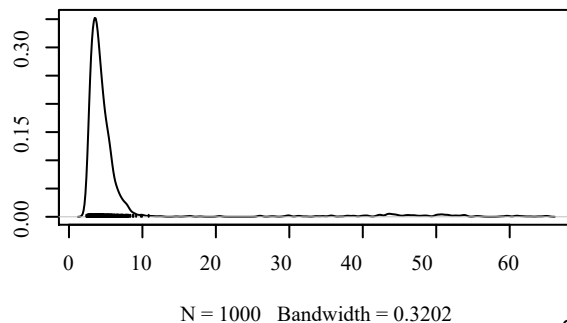

Figure S1: MCMC  
traceplots

Trace of Deviance

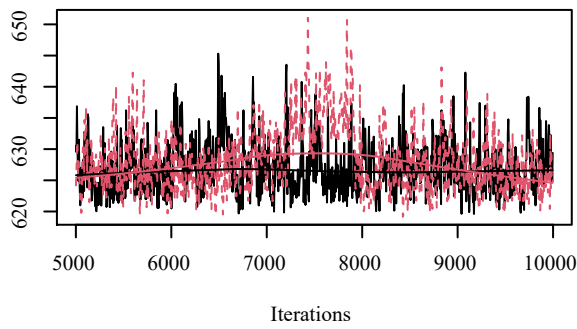

Density of Deviance

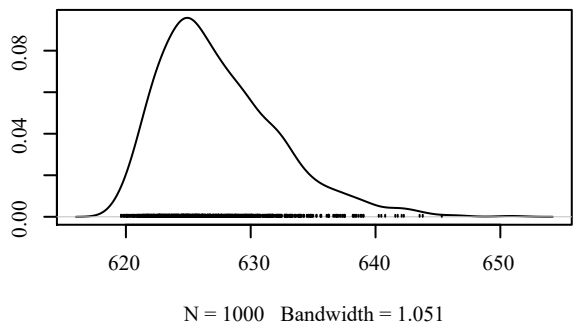

Henipavirus ZIB memc traceplot

Figure S1: MCMC traceplots

**Trace of beta.(Intercept)**

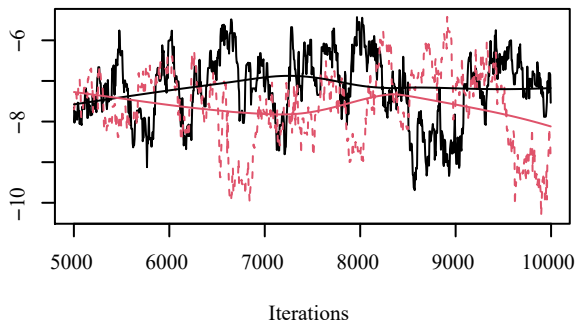

**Density of beta.(Intercept)**

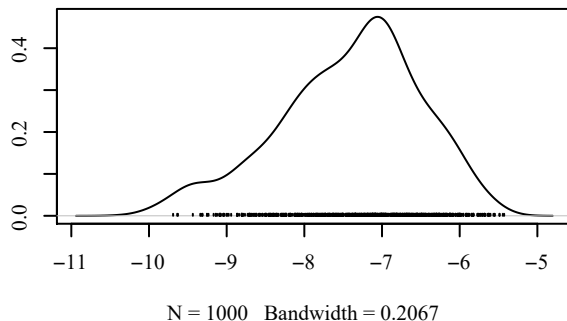

**Trace of beta.layer.1**

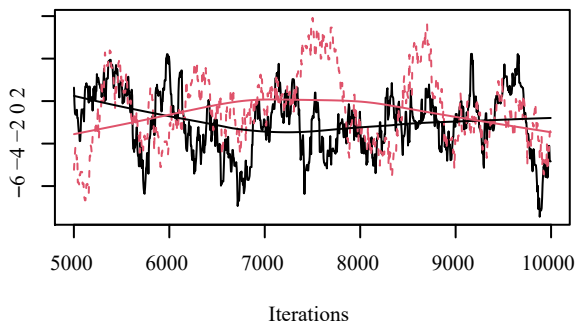

**Density of beta.layer.1**

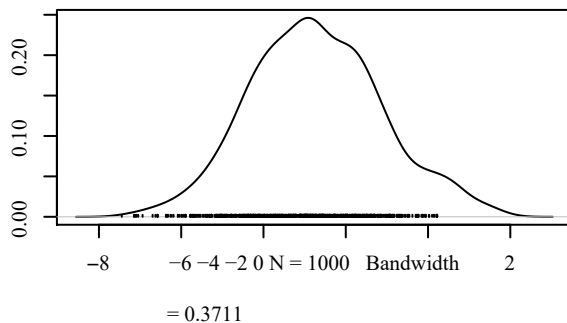

**Trace of beta.layer.2**

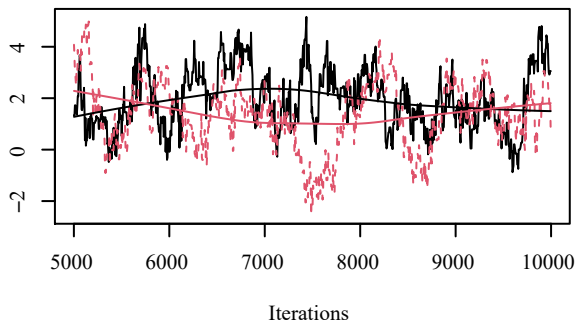

**Density of beta.layer.2**

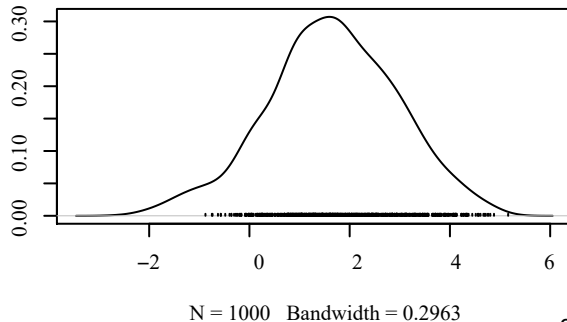

Figure S1: MCMC  
traceplots

Trace of beta.layer

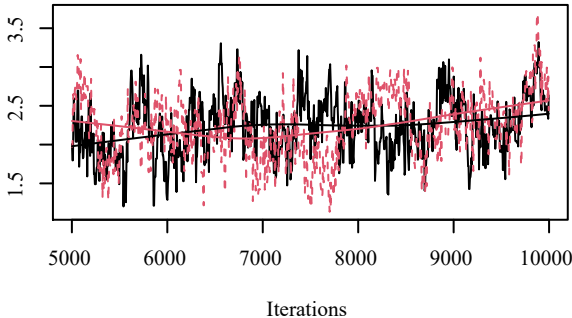

Density of beta.layer

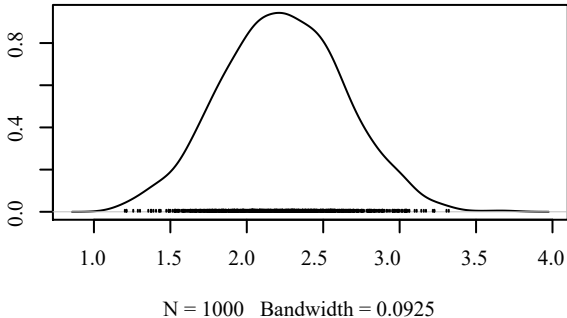

Trace of beta.lc

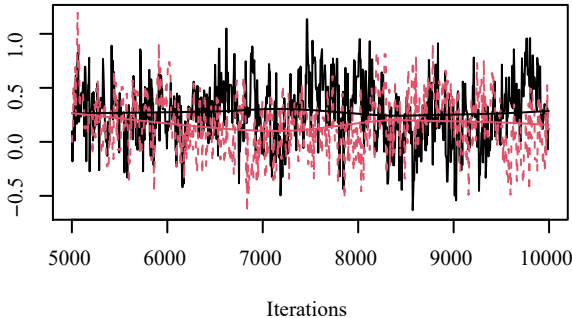

Density of beta.lc

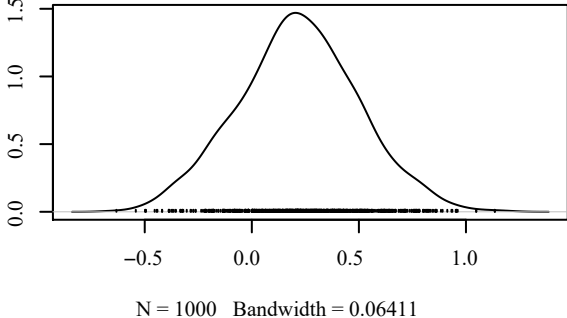

Trace of beta.alt

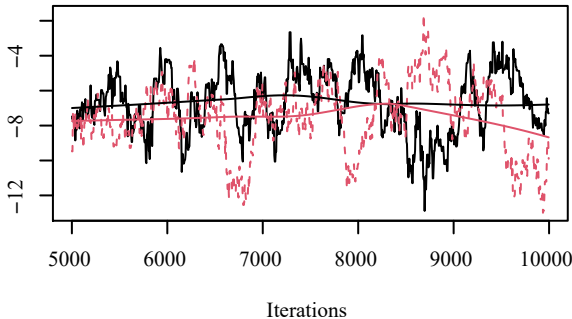

Density of beta.alt

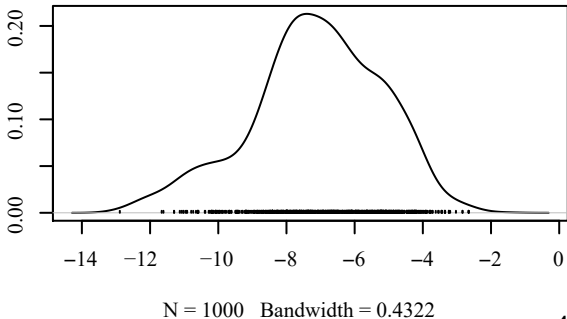



Figure S1: MCMC  
traceplots

Trace of beta.lc\_modi

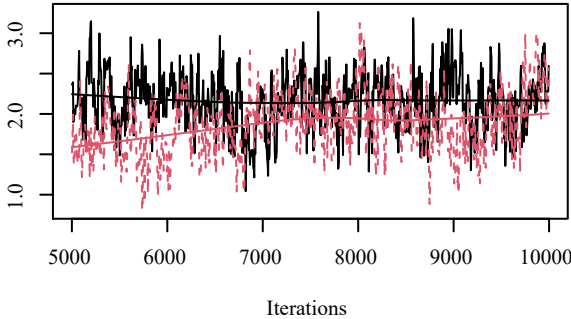

Density of beta.lc\_modi

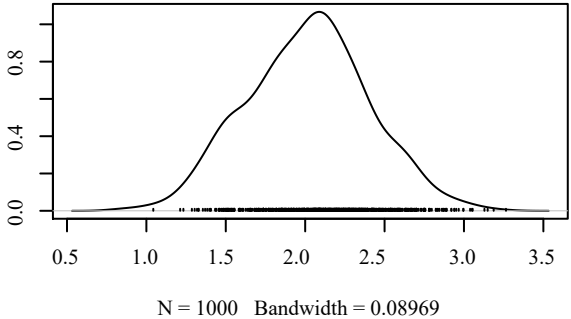

Trace of beta.pop\_den

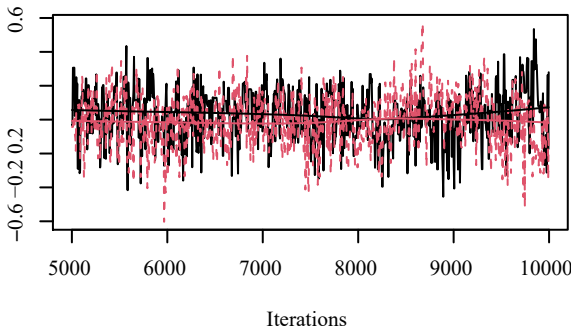

Density of beta.pop\_den

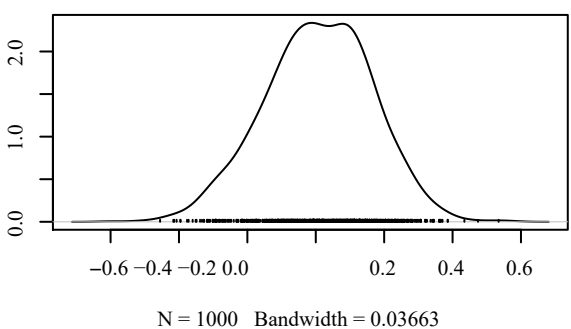

Trace of Vrho

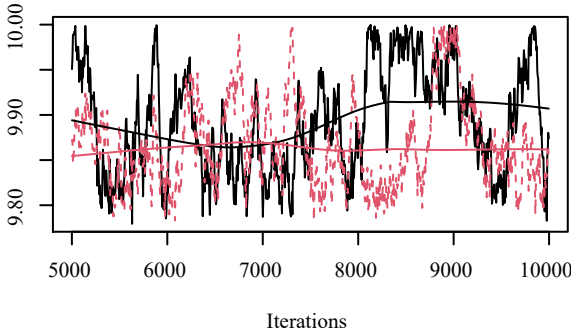

Density of Vrho

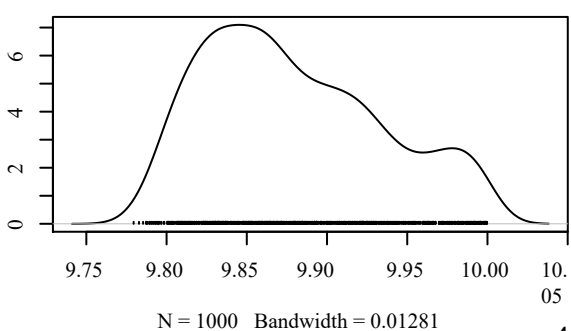

Figure S1: MCMC  
traceplots

Trace of Deviance

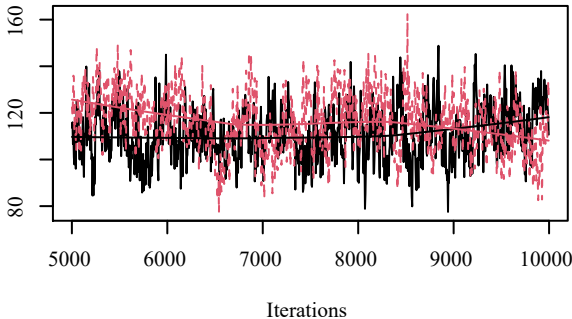

Density of Deviance

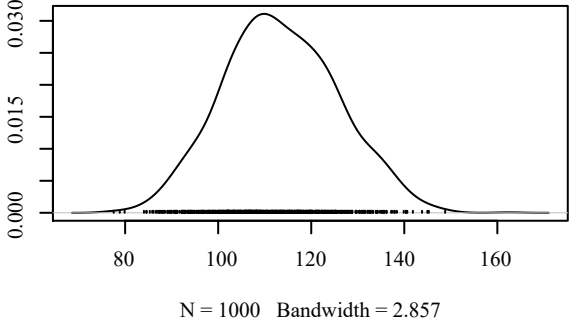

Figure S1: MCMC Trace of beta.(Intercept)  
traceplots

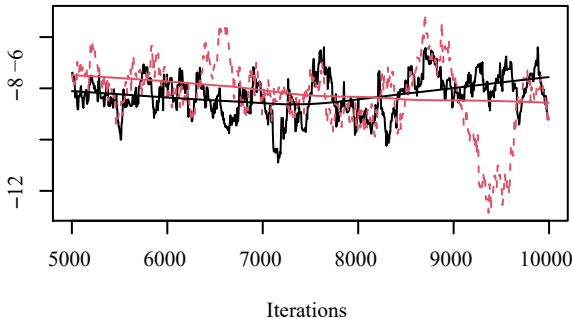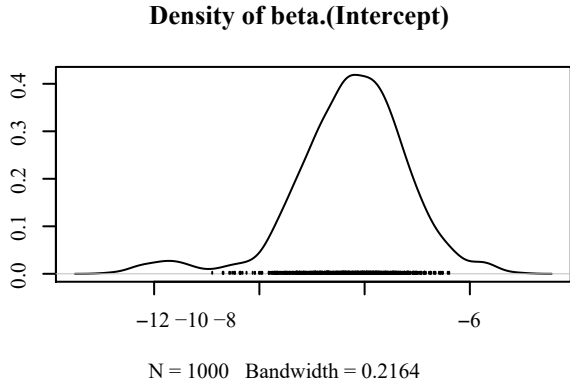

Trace of beta.layer.1

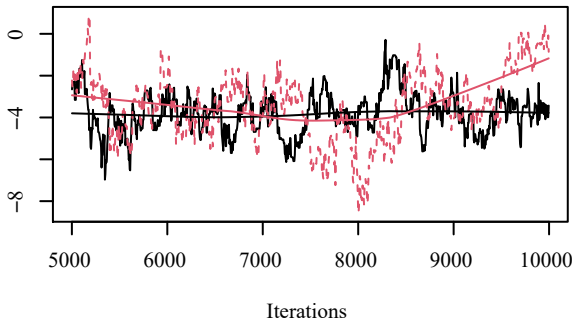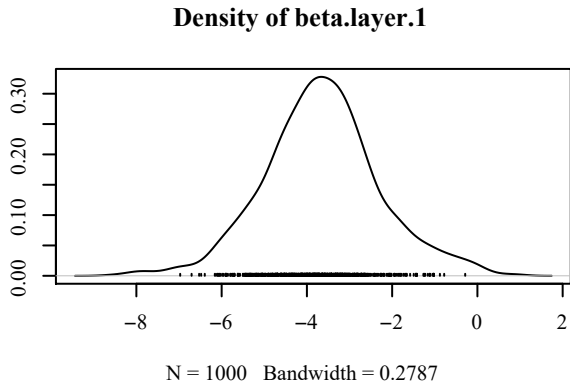

Trace of beta.layer.2

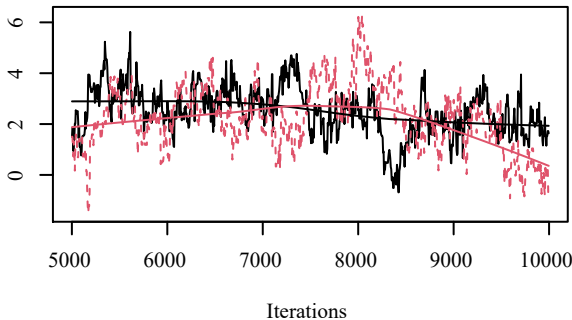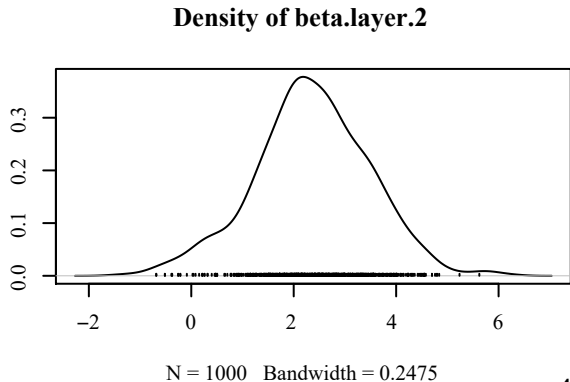

Henipavirus ZIB iCAR memc traceplot

Figure S1: MCMC  
traceplots

Trace of beta.layer

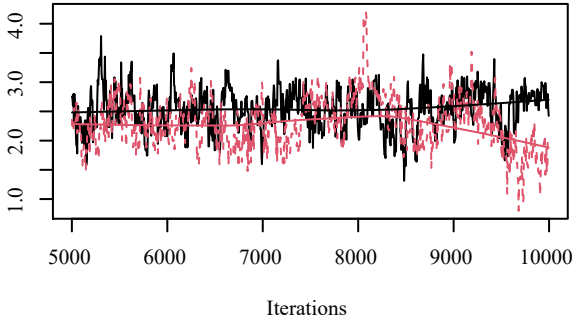

Density of beta.layer

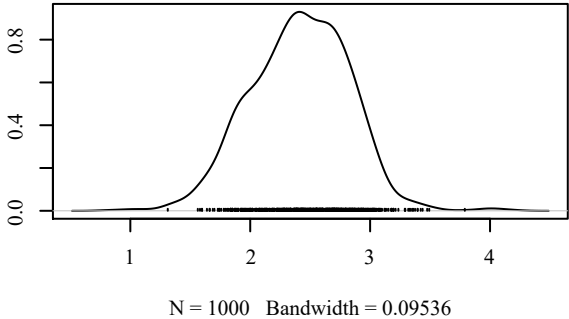

Trace of beta.lc

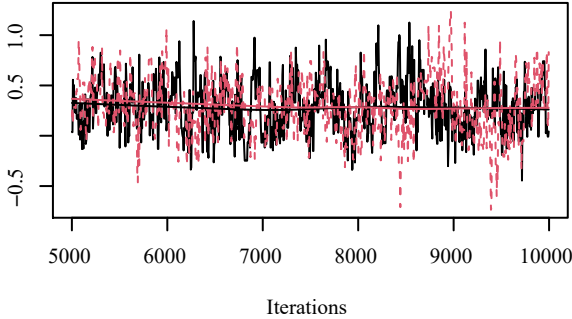

Density of beta.lc

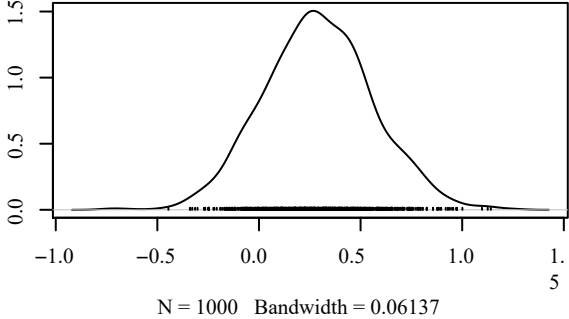

Trace of beta.alt

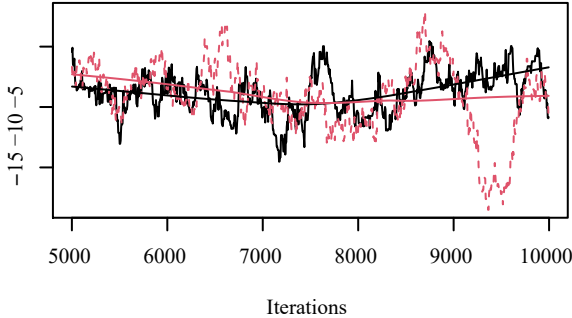

Density of beta.alt

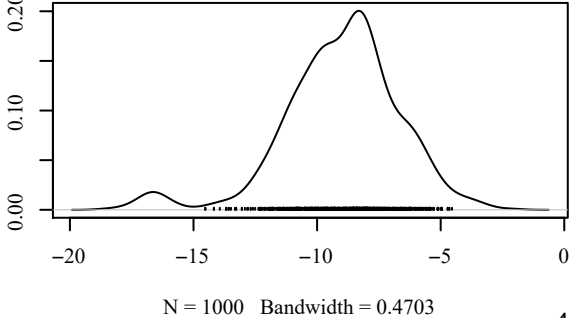

Figure S1: MCMC  
traceplots

Trace of beta.lc\_modi

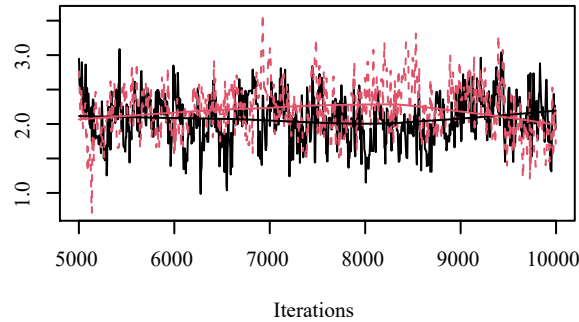

Density of beta.lc\_modi

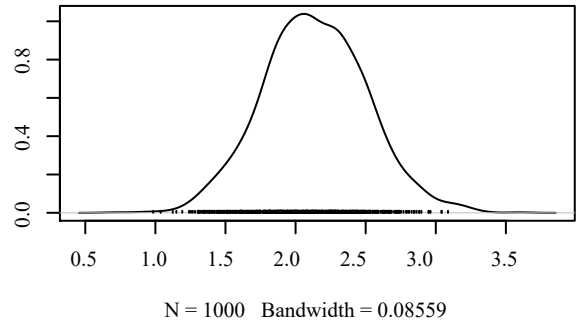

Trace of beta.pop\_den

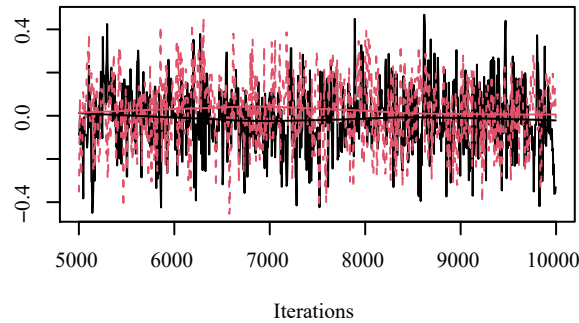

Density of beta.pop\_den

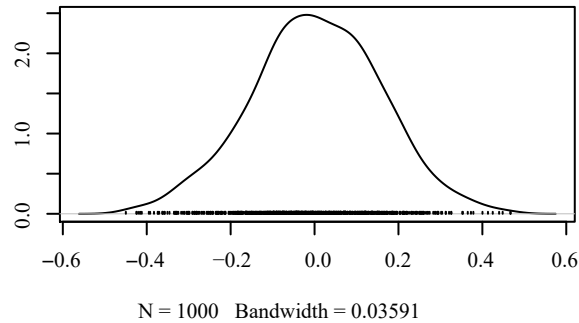

Trace of gamma.(Intercept)

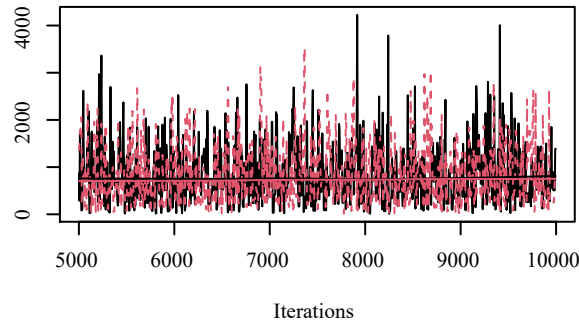

Density of gamma.(Intercept)

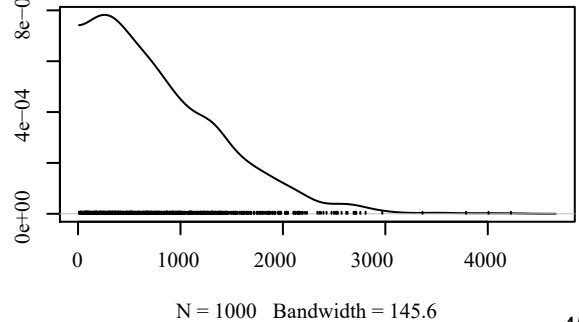

Henipavirus ZIB iCAR memc traceplot

Figure S1: MCMC traceplots

**Trace of  $V_{rho}$**

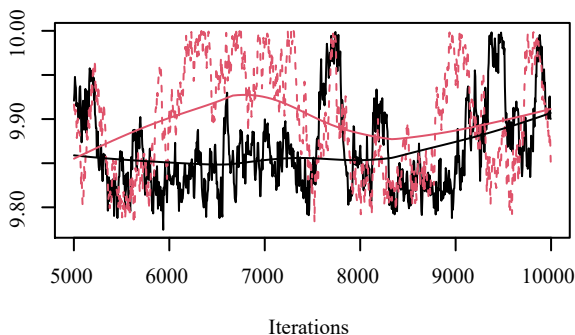

**Density of  $V_{rho}$**

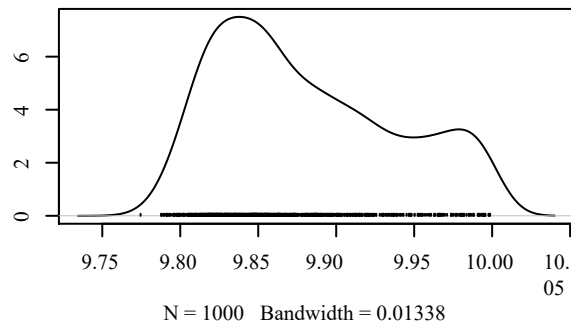

**Trace of Deviance**

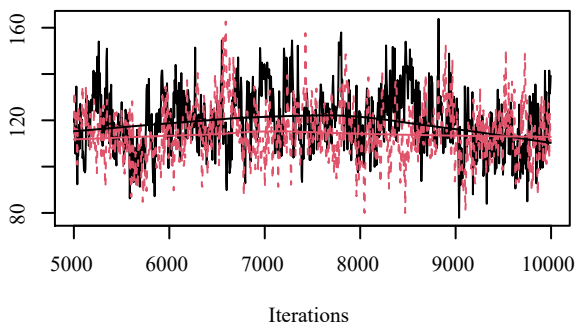

**Density of Deviance**

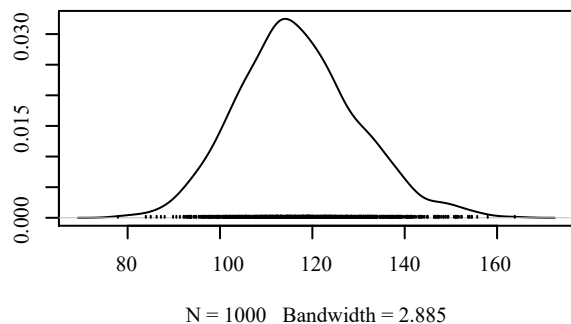

Iterations = 5001:9996 Thinning  
interval = 5 Number of chains = 2  
Sample size per chain = 1000

**1. Empirical mean and standard deviation for each variable,  
plus standard error of the mean:**

|                   | Mean     | SD       | Naive SE | Time-series SE |
|-------------------|----------|----------|----------|----------------|
| beta.( Intercept) | -5.0585  | 0.38275  | 0.008558 | 0.035358       |
| beta.layer.1      | 2.8126   | 0.63396  | 0.014176 | 0.091549       |
| beta.layer.2      | -1.2756  | 0.43896  | 0.009815 | 0.044785       |
| beta.layer        | 1.5379   | 0.28266  | 0.006321 | 0.020456       |
| beta.lc           | -0.4537  | 0.23741  | 0.005309 | 0.016624       |
| beta.alt          |          | 0.42220  | 0.009441 | 0.043218       |
| beta. lc_modi     | 1.2101   | 0.24662  | 0.005515 | 0.019175       |
| beta.pop_den      | 1.4288   | 0.52485  | 0.011736 | 0.028831       |
| Vrho              | 9.9117   | 0.06608  | 0.001478 | 0.009067       |
| Deviance          | 268.5234 | 18.59034 | 0.415693 | 1.368309       |

**2. Quantiles for each variable:**

|                  | 2.5%     | 25%      | 50%      | 75%      | 97.5%      |
|------------------|----------|----------|----------|----------|------------|
| beta.(Intercept) | -5.9281  | -5.2883  | -5.0267  | -4.8015  | -4.377118  |
| beta.layer.1     | 1.6322   | 2.3601   | 2.8213   | 3.2370   | 4.093664   |
| beta.layer.2     | -2.1452  | -1.5521  | -1.2730  | -0.9835  | -0.416579  |
| beta.layer       | 0.9906   | 1.3403   | 1.5413   | 1.7226   | 2.083984   |
| beta.lc          | -0.9343  | -0.6152  | -0.4509  | -0.2934  | -0.008502  |
| beta.alt         | 1.2272   | 1.5100   | 1.8304   | 2.359139 | 0.7510     |
| beta.lc_modi     | 1.2039   | 1.3657   | 1.720882 | 0.4723   | 1.0645     |
| beta.pop_den     | 1.7538   | 2.541129 |          |          | 1.3920     |
| Vrho             | 9.7524   | 9.8724   | 9.9292   | 9.9623   | 9.995419   |
| Deviance         | 234.5247 | 255.2666 | 268.5496 | 280.7599 | 307.406395 |

**Potential scale reduction factors:**

|                  | Point est. | Upper C.I. |
|------------------|------------|------------|
| beta.(Intercept) | 1.08       | 1.11       |
| beta.layer.1     | 1.05       | 1.13       |
| beta.layer.2     | 1.10       | 1.18       |
| beta.layer       | 1.04       | 1.16       |
| beta.lc          | 1.01       | 1.03       |
| beta.alt         | 1.04       | 1.17       |
| beta.lc_modi     | 1.02       | 1.10       |
| beta.pop_den     | 1.03       | 1.12       |
| Vrho             | 1.03       | 1.15       |
| Deviance         | 1.02       | 1.08       |

**Multivariate psrf**      **1.01**

## Filoviridae- ZIB model

Iterations = 5001:9996 Thinning  
interval = 5 Number of chains = 2  
Sample size per chain = 1000

### 1. Empirical mean and standard deviation for each variable, plus standard error of the mean:

|                   | Mean     | SD     | Naive SE | Time-series SE |
|-------------------|----------|--------|----------|----------------|
| beta.( Intercept) | -2.4360  | 0.2005 | 0.004483 | 0.014305       |
| beta.layer.1      | 3.0160   | 0.3328 | 0.007443 | 0.027527       |
| beta.layer.2      | -1.4385  | 0.2119 | 0.004739 | 0.010294       |
| beta.layer        | 1.4636   | 0.1627 | 0.003638 | 0.007255       |
| beta.lc           | -0.5116  | 0.1397 | 0.003124 | 0.005707       |
| beta.alt          |          |        | 0.2289   | 0.005119       |
| beta.lc_modi      | 0.9691   | 0.1217 | 0.002721 | 0.004821       |
| beta.pop_den      | 1.4301   | 0.3510 | 0.007849 | 0.011363       |
| Deviance          | 839.2431 | 3.9822 | 0.089046 | 0.202869       |

### 2. Quantiles for each variable:

|                  | 2.5%     | 25%      | 50%      | 75%      | 97.5%    |
|------------------|----------|----------|----------|----------|----------|
| beta.(Intercept) | -2.8509  | -2.5694  | -2.4249  | -2.2968  | -2.0594  |
| beta.layer.1     | 2.4301   | 2.7740   | 3.0153   | 3.2328   | 3.6853   |
| beta.layer.2     | -1.8613  | -1.5798  | -1.4316  | -1.2940  | -1.0319  |
| beta.layer       | 1.1559   | 1.3522   | 1.4624   | 1.5733   | 1.7776   |
| beta.lc          | -0.7829  | -0.6050  | -0.5106  | -0.4143  | -0.2414  |
| beta.alt         | 1.4303   | 1.7023   | 1.8535   | 2.0087   | 2.3234   |
| beta.lc_modi     | 0.8872   | 0.9675   | 1.0515   | 1.2153   | 1.4161   |
| beta.pop_den     | 0.7658   | 0.9675   | 1.0515   | 1.2153   | 1.4161   |
| Deviance         | 833.5560 | 836.3873 | 838.5348 | 841.3827 | 848.7955 |

### Potential scale reduction factors:

|                  | Point est. | Upper C.I. |
|------------------|------------|------------|
| beta.(Intercept) | 1.01       | 1.04       |
| beta.layer.1     | 1.02       | 1.09       |
| beta.layer.2     | 1.00       | 1.01       |
| beta.layer       | 1.00       | 1.00       |
| beta.lc          | 1.00       | 1.00       |
| beta.alt         | 1.00       | 1.00       |
| beta.lc_modi     | 1.00       | 1.06       |
| beta.pop_den     | 1.00       | 1.01       |
| Deviance         | 1.00       | 1.00       |
|                  | 1.01       | 1.02       |

### Multivariate psrf

1.02



# Filoviridae- Binomial iCAR model

Iterations = 5001:9996 Thinning  
interval = 5 Number of chains = 2  
Sample size per chain = 1000

## 1. Empirical mean and standard deviation for each variable, plus standard error of the mean:

|                    | Mean     | SD        | Naive SE | Time-series SE |
|--------------------|----------|-----------|----------|----------------|
| beta.( Intercept)  | -68.584  | 20.47129  | 0.4578   | 6.285113       |
| beta.layer.1       | 184.727  | 76.96106  | 1.7209   | 20.970875      |
| beta.layer.2       | -161.274 | 66.52704  | 1.4876   | 17.530246      |
| beta.layer         | 146.552  | 56.67100  | 1.2672   | 14.934569      |
| beta.lc            | 26.221   | 21.29192  | 0.4761   | 3.294789       |
| beta.alt           | 86.114   | 34.51012  | 0.7717   | 5.069096       |
| beta.lc_modi       | 20.336   | 9.84002   | 0.2200   | 0.985933       |
| beta.pop_den       | 270.768  | 183.23397 | 4.0972   | 53.637638      |
| gamma.( Intercept) | 1.062    | 0.08945   | 0.0020   | 0.002459       |
| Deviance           | 764.375  | 4.91207   | 0.1098   | 0.291679       |

## 2. Quantiles for each variable:

|                   | 2.5%      | 25%      | 50%     | 75%      | 97.5%   |
|-------------------|-----------|----------|---------|----------|---------|
| beta.(Intercept)  | -122.6578 | -77.441  | -67.79  | -55.346  | -36.732 |
| beta.layer.1      | 74.0126   | 127.148  | 162.59  | 241.215  | 321.694 |
| beta.layer.2      | -278.9760 | -212.217 | -143.69 | -110.954 | -64.301 |
| beta.layer        | 61.0214   | 105.083  | 132.25  | 201.442  | 243.409 |
| beta.lc           | -1.9518   | 10.361   | 17.84   | 41.800   | 69.142  |
| beta.alt          | 33.5277   | 58.772   | 81.14   | 115.079  | 152.069 |
| beta.lc_modi      | 6.2491    | 12.448   | 18.53   | 27.078   | 42.176  |
| beta.pop_den      | 129.690   | 186.50   | 394.954 | 634.447  |         |
| gamma.(Intercept) | 0.8874    | 1.003    | 1.06    | 1.119    | 1.241   |
| Deviance          | 756.7407  | 760.864  | 763.77  | 767.172  | 775.737 |

## Potential scale reduction factors:

|                   | Point est. | Upper C.I. |
|-------------------|------------|------------|
| beta.(Intercept)  | 1.42       | 2.38       |
| beta.layer.1      | 3.17       | 8.29       |
| beta.layer.2      | 3.15       | 8.13       |
| beta.layer        | 3.20       | 7.61       |
| beta.lc           | 2.51       | 8.71       |
| beta.alt          | 2.84       | 6.25       |
| beta.lc_modi      | 2.16       | 4.73       |
| beta.pop_den      | 2.90       | 12.15      |
| gamma.(Intercept) | 1.00       | 1.01       |
| Deviance          | 1.06       | 1.23       |

**Multivariate psrf** 2.17

Iterations = 5001:9996 Thinning  
interval = 5 Number of chains = 2  
Sample size per chain = 1000

**1. Empirical mean and standard deviation for each variable,  
plus standard error of the mean:**

|                   | Mean     | SD        | Naive SE  | Time-series SE |
|-------------------|----------|-----------|-----------|----------------|
| beta.(Intercept)  | -5.0058  | 0.34385   | 0.007689  | 0.02988        |
| beta.layer.1      | 2.5048   | 0.54371   | 0.012158  | 0.06129        |
| beta.layer.2      | -1.2656  | 0.42426   | 0.009487  | 0.03501        |
| beta.layer        | 1.4961   | 0.26798   | 0.005992  | 0.02517        |
| beta.lc           | -0.6177  | 0.23187   | 0.005185  | 0.01600        |
| beta.alt          | 1.3166   | 0.38944   | 0.008708  | 0.04137        |
| beta.lc_modi      | 1.1634   | 0.23215   | 0.005191  | 0.01679        |
| beta.pop_den      | 1.3672   | 0.51480   | 0.011511  | 0.02824        |
| gamma.(Intercept) | 814.8946 | 620.53149 | 13.875506 | 19.42589       |
| Vrho              | 9.9018   | 0.07377   | 0.001649  | Deviance       |
| 267.1366          | 19.03855 | 0.425715  |           | 1.65344        |

**2. Quantiles for each variable:**

|                   | 2.5%     | 25%      | 50%      | 75%       | 97.5%     |
|-------------------|----------|----------|----------|-----------|-----------|
| beta.(Intercept)  | -5.6722  | -5.2418  | -5.0128  | -4.7700   | -4.3141   |
| beta.layer.1      | 1.4060   | 2.1420   | 2.4936   | 2.8745    | 3.6247    |
| beta.layer.2      | -2.1314  | -1.5475  | -1.2646  | -0.9791   | -0.4775   |
| beta.layer        | 1.0052   | 1.3065   | 1.4921   | 1.6650    | 2.0475    |
| beta.lc           | -1.0441  | -0.7742  | -0.6215  | -0.4535   | -0.1562   |
| beta.alt          | 0.5948   | 1.0561   | 1.3028   | 1.5745    | 2.1356    |
| beta.lc_modi      | 0.7507   | 0.9962   | 1.1450   | 1.3280    | 1.6362    |
| beta.pop_den      | 0.4781   | 1.0035   | 1.3313   | 1.7039    | 2.4967    |
| gamma.(Intercept) | 37.1924  | 339.1505 | 694.1825 | 1159.6324 | 2390.2706 |
| Vrho              | 9.9203   | 9.9646   | 9.9957   |           |           |
| Deviance          | 231.4583 | 254.5566 | 266.4477 | 279.7336  | 305.0297  |

**Potential scale reduction factors:**

|                   | Point est. | Upper C.I. |
|-------------------|------------|------------|
| beta.(Intercept)  | 1.12       | 1.43       |
| beta.layer.1      | 1.03       | 1.12       |
| beta.layer.2      | 1.05       | 1.22       |
| beta.layer        | 1.00       | 1.01       |
| beta.lc           | 1.02       | 1.09       |
| beta.alt          | 1.02       | 1.02       |
| beta.lc_modi      | 1.01       | 1.04       |
| beta.pop_den      | 1.01       | 1.03       |
| gamma.(Intercept) | 1.00       | 1.00       |
| Vrho              | 1.05       | 1.18       |

|          |      |      |
|----------|------|------|
| Deviance | 1.00 | 1.00 |
|----------|------|------|

**Multivariate psrf**

**1.12**

**Model Deviance Perc**

|   |               |           |     |
|---|---------------|-----------|-----|
| 1 | NULL          | 1891.4073 | 0   |
| 2 | env           | 764.3752  | 69  |
| 3 | binomial      | 839.2431  | 65  |
| 4 | binomial.icar | 268.5234  | 100 |
| 5 | ZIB.icar      | 267.1366  | 100 |

|          |      |        |
|----------|------|--------|
| "masTSS" | "OA" | "prob" |
| 0.99 1   | 0.66 |        |

## Coronaviridae- Binomial model

Iterations = 5001:9996 Thinning  
interval = 5 Number of chains = 2  
Sample size per chain = 1000

1. Empirical mean and standard deviation for each variable,  
plus standard error of the mean:

|                   | Mean     | SD     | Naive SE | Time-series SE |
|-------------------|----------|--------|----------|----------------|
| beta.( Intercept) | -2.1638  | 0.2205 | 0.004929 | 0.015419       |
| beta.layer.1      | 3.7979   | 0.8500 | 0.019007 | 0.141365       |
| beta.layer.2      | -0.6954  | 0.6879 | 0.015382 | 0.106804       |
| beta.layer        | -0.7493  | 0.2248 | 0.005027 | 0.028991       |
| beta.lc           | -0.3097  | 0.1591 | 0.003557 | 0.006269       |
| beta.alt          |          |        | 0.2213   | 0.004948       |
| beta.lc_modi      | 2.5148   | 0.2299 | 0.005142 | 0.011551       |
| beta.pop_den      | 2.5332   | 0.3239 | 0.007244 | 0.011723       |
| Deviance          | 629.1162 |        | 4.1161   | 0.092039       |
|                   |          |        |          | 0.156460       |

2. Quantiles for each variable:

|                  | 2.5%      | 25%      | 50%      | 75%      |
|------------------|-----------|----------|----------|----------|
| beta.(Intercept) | -2.6155   | -2.3058  | -2.1630  | -2.0255  |
| beta.layer.1     | 2.0819    | 3.2633   | 3.8563   | 4.3605   |
| beta.layer.2     | -1.9724   | -1.1275  | -0.7602  | -0.2885  |
| beta.layer       | -1.1868   | -0.9021  | -0.7542  | -0.5926  |
| beta.lc          | -0.6217   | -0.4195  | -0.3057  | -0.1974  |
| beta.alt         |           | 2.2091   | 2.3555   | 2.5068   |
| beta.lc_modi     | 2.0629    | 2.3564   | 2.5175   | 2.6632   |
| beta.pop_den     | 1.9309    | 2.3045   | 2.5273   | 2.7513   |
| Deviance         | 623.3048  | 626.1436 | 628.5594 | 631.3158 |
|                  | 97.5%     |          |          |          |
| beta.(Intercept) | -1.73494  |          |          |          |
| beta.layer.1     | 5.34437   |          |          |          |
| beta.layer.2     | 0.76732   |          |          |          |
| beta.layer       | -0.31073  |          |          |          |
| beta.lc          | -0.01345  |          |          |          |
| beta.alt         | 2.77599   |          |          |          |
| beta.lc_modi     | 3.00822   |          |          |          |
| beta.pop_den     | 3.19233   |          |          |          |
| Deviance         | 638.75865 |          |          |          |

Potential scale reduction factors:

|                  | Point est. | Upper C.I. |
|------------------|------------|------------|
| beta.(Intercept) | 1.02       | 1.09       |
| beta.layer.1     | 1.11       | 1.42       |
| beta.layer.2     | 1.09       | 1.35       |
| beta.layer       | 1.06       | 1.24       |

|              |      |      |
|--------------|------|------|
| beta.lc      | 1.00 | 1.01 |
| beta.alt     | 1.04 | 1.18 |
| beta.lc_modi | 1.01 | 1.07 |
| beta.pop_den | 1.00 | 1.00 |
| Deviance     | 1.01 | 1.04 |

Multivariate psrf

1.07

## Coronaviridae- ZIB model

Iterations = 10001:19991 Thinning  
interval = 10 Number of chains = 2  
Sample size per chain = 1000

1. Empirical mean and standard deviation for each variable,  
plus standard error of the mean:

|                   | Mean     | SD       | Naive SE | Time-series SE |
|-------------------|----------|----------|----------|----------------|
| beta.(Intercept)  | -224.637 | 88.0989  | 1.969952 | 5.998e+01      |
| beta.layer.1      | 255.155  | 125.6389 | 2.809370 | 6.025e+ 01     |
| beta.layer.2      | 124.343  | 98.5342  | 2.203292 | 3.987e+ 01     |
| beta.layer        | -23.198  | 19.6178  | 0.438668 | 5.455e+00      |
| beta.lc           | 1.894    | 8.3197   | 0.186035 | 1.131e+00      |
| beta.alt          | 253.489  | 95.1583  | 2.127805 | 5.831e+01      |
| beta.lc_modi      | 425.926  | 161.5253 | 3.611816 | 1.114e+02      |
| beta.pop_den      | 29.792   | 45.2351  | 1.011489 | 8.569e+00      |
| gamma.(Intercept) | 1.582    | 0.1125   | 0.002515 | 2.656e-03      |
| Deviance          | 548.472  | 5.8761   | 0.131393 | 6.678e-01      |

2. Quantiles for each variable:

|                   | 2.5%      | 25%      | 50%      | 75%      |
|-------------------|-----------|----------|----------|----------|
| beta.(Intercept)  | -414.5339 | -260.954 | -224.749 | -166.357 |
| beta.layer.1      | 52.8548   | 158.580  | 259.036  | 348.230  |
| beta.layer.2      | 0.6359    | 48.964   | 92.950   | 180.589  |
| beta.layer        | -63.0630  | -37.165  | -21.297  | -6.601   |
| beta.lc           | -15.3978  | -3.038   | 1.023    | 7.661    |
| beta.alt          | 97.7189   | 193.783  | 260.491  | 300.421  |
| beta.lc_modi      | 166.9442  | 333.225  | 436.017  | 495.776  |
| beta.pop_den      | -12.3879  | 1.657    | 11.688   | 38.266   |
| gamma.(Intercept) | 1.3712    | 1.508    | 1.581    | 1.658    |
| Deviance          | 537.3869  | 544.428  | 547.923  | 552.011  |

beta.(Intercept) -89.949  
beta.layer.1 485.966  
beta.layer.2 386.439  
beta.layer 4.337  
beta.lc17.872  
beta.alt445.758  
beta.lc\_modi 759.543  
beta.pop\_den 164.533 gamma.  
(Intercept) 1.802 Deviance  
561.017

Potential scale reduction factors:

|                  | Point est. | Upper C.I. |
|------------------|------------|------------|
| beta.(Intercept) | 1.25       | 1.30       |

|                   |      |      |
|-------------------|------|------|
| beta.layer.1      | 1.29 | 1.98 |
| beta.layer.2      | 1.14 | 1.47 |
| beta.layer1.25    |      | 1.83 |
| beta.lc           | 1.11 | 1.36 |
| beta.alt          | 1.26 | 1.82 |
| beta.lc_modi      | 1.25 | 1.54 |
| beta.pop_den      | 1.42 | 3.32 |
| gamma.(Intercept) | 1.01 | 1.04 |
| Deviance          | 1.06 | 1.24 |

Multivariate psrf

1.38

Iterations = 5001:9996 Thinning  
interval = 5 Number of chains = 2  
Sample size per chain = 1000

1. Empirical mean and standard deviation for each variable,  
plus standard error of the mean:

|                   | Mean    | SD       | Naive SE | Time-series SE |
|-------------------|---------|----------|----------|----------------|
| beta.( Intercept) | -5.8993 | 0.60388  | 0.013503 | 0.054930       |
| beta. layer. 1    | 3.1738  | 1.99638  | 0.044640 | 0.388036       |
| beta. layer. 2    | -0.1431 | 1.72627  | 0.038600 | 0.302624       |
| beta. layer       | -1.4755 | 0.57547  | 0.012868 | 0.069770       |
| beta.lc           | -0.1733 | 0.42810  | 0.009573 | 0.022948       |
| beta.alt          |         | 0.58802  | 0.013149 | 0.055892       |
| beta. lc_modi     | 2.5623  | 0.58561  | 0.013095 | 0.040325       |
| beta. pop_den     | 3.3864  | 0.90664  | 0.020273 | 0.080053       |
| Vrho              | 0.9211  | 0.04686  | 0.001048 | 0.007787       |
| Deviance          | 63.0917 | 10.20057 | 0.228092 | 0.805057       |

2. Quantiles for each variable:

|                  | 2.5%    | 25%     | 50%     | 75%     | 97.5%   |
|------------------|---------|---------|---------|---------|---------|
| beta.(Intercept) | -7.057  | -6.2937 | -5.9007 | -5.4734 | -4.7317 |
| beta.layer.1     | 1.8136  | 3.3688  | 4.6736  | 6.4875  |         |
| beta.layer.2     | -0.1816 | 1.0283  | 3.2976  |         |         |
| beta.layer       | -1.0505 | -0.4358 |         | -1.059  | -0.4522 |
| beta.lc          | 0.6530  |         |         |         |         |
| beta.alt         |         | 0.837   | 1.6606  | 2.0643  | 2.4616  |
| beta.lc_modi     | 1.497   | 2.1540  | 2.5237  | 2.9314  | 3.7982  |
| beta.pop_den     | 1.745   | 2.7541  | 3.3471  | 3.9601  | 5.1832  |

|          |        |         |         |         |         |
|----------|--------|---------|---------|---------|---------|
| Vrho     | 0.839  | 9.8821  | 9.9220  | 9.9619  | 9.9956  |
| Deviance | 44.653 | 55.9676 | 62.6950 | 69.8488 | 83.9747 |

Potential scale reduction factors:

|                  | Point est. | Upper C.I. |
|------------------|------------|------------|
| beta.(Intercept) | 1.09       | 1.34       |
| beta.layer.1     | 1.01       | 1.02       |
| beta.layer.2     | 1.01       | 1.02       |
| beta.layer       | 1.10       | 1.38       |
| beta.lc          | 1.01       | 1.03       |
| beta.alt         | 1.04       | 1.16       |
| beta.lc_modi     | 1.22       | 1.73       |
| beta.pop_den     | 1.44       | 2.30       |
| Vrho             | 1.01       | 1.06       |
| Deviance         | 1.05       | 1.18       |

|                   |     |
|-------------------|-----|
| Multivariate psrf | 1.4 |
|-------------------|-----|



Iterations = 10001:19991 Thinning  
interval = 10 Number of chains = 2  
Sample size per chain = 1000

1. Empirical mean and standard deviation for each variable,  
plus standard error of the mean:

|                   | Mean    | SD        | Naive SE beta. |
|-------------------|---------|-----------|----------------|
| (Intercept)       | -6.257  | 0.62276   | 0.013925       |
| beta.layer.1      | 4.312   | 2.63169   | 0.058846       |
| beta.layer.2      | -0.990  | 2.19117   | 0.048996       |
| beta.layer        | -1.849  | 0.72472   | 0.016205       |
| beta.lc           | -0.262  | 0.44891   | 0.010038       |
| beta.alt          | 2.206   | 0.65840   | 0.014722       |
| beta.lc_modi      | 2.522   | 0.56494   | 0.012632       |
| beta.pop_den      | 3.755   | 0.83355   | 0.018639       |
| gamma.(Intercept) | 776.973 | 587.09236 | 13.127784      |

|               |        |          |          |
|---------------|--------|----------|----------|
| Vrho Deviance | 9.919  | 0.04903  | 0.001096 |
|               | 59.005 | 10.23167 | 0.228787 |

Time-series SE

|                   |           |
|-------------------|-----------|
| beta.(Intercept)  | 0.044082  |
| beta.layer.1      | 0.532657  |
| beta.layer.2      | 0.382394  |
| beta.layer        | 0.093402  |
| beta.lc           | 0.023349  |
| beta.alt          | 0.099156  |
| beta.lc_modi      | 0.030517  |
| beta.pop_den      | 0.059244  |
| gamma.(Intercept) | 14.200550 |
| Vrho              | 0.006272  |
| Deviance          | 0.721394  |

2. Quantiles for each variable:

|                   | 2.5%    | 25%      | 50%      | 75%        |
|-------------------|---------|----------|----------|------------|
| beta.(Intercept)  | -7.5764 | -6.6587  | -6.2157  | -5.81767   |
| beta.layer.1      | -1.0942 | 2.7539   | 4.3463   | 5.92397    |
| beta.layer.2      | -5.0734 | -2.4187  | -0.9744  | 0.33959    |
| beta.layer        | -3.2070 | -2.3339  | -1.8875  | -1.36643   |
| beta.lc           | -1.1423 | -0.5646  | -0.2654  | 0.02459    |
| beta.alt          | 1.7687  | 2.2031   | 2.63256  |            |
| beta.lc_modi      | 1.4749  | 2.1512   | 2.5048   | 2.90040    |
| beta.pop_den      | 2.1531  | 3.1863   | 3.7472   | 4.30956    |
| gamma.(Intercept) | 38.1536 | 320.4527 | 639.2747 | 1123.56527 |
| Vrho              | 9.8351  | 9.8755   | 9.9217   | 9.96113    |
| Deviance          | 40.7212 | 51.9276  | 58.3373  | 65.39818   |
|                   | 97.5%   |          |          |            |
| beta.(Intercept)  | -5.1221 |          |          |            |
| beta.layer.1      | 9.3579  |          |          |            |
| beta.layer.2      | 3.5601  |          |          |            |
| beta.layer        | -0.3798 |          |          |            |

beta.lc 0.6421  
beta.alt 3.5145  
beta.lc\_modi 3.6880  
beta.pop\_den 5.4344  
gamma.(Intercept) 2115.2218  
Vrho 9.9968  
Deviance 81.1050

Potential scale reduction factors:

|                    | Point est. Upper C.I. |      |
|--------------------|-----------------------|------|
| beta.(Intercept)   | 1.03                  | 1.11 |
| beta.layer.1       | 1.05                  | 1.05 |
| beta.layer.2       | 1.05                  | 1.07 |
| beta.layer.beta.lc | 1.02                  | 1.10 |
| beta.alt           | 1.00                  | 1.00 |
| beta.lc_modi       | 1.01                  | 1.02 |
| beta.pop_den       | 1.03                  | 1.15 |
|                    | 1.01                  | 1.03 |
| gamma.(Intercept)  | 1.00                  | 1.00 |
| Vrho Deviance      | 1.00                  | 1.02 |
| Multivariate psrf  | 1.00                  | 1.00 |
|                    | 1.17                  |      |

|   | Model         | Deviance   | Perc |
|---|---------------|------------|------|
| 1 | NULL          | 1889.17448 | 0    |
| 2 | env           | 548.47170  | 74   |
| 3 | binomial      | 629.11621  | 69   |
| 4 | binomial.icar | 63.09174   | 100  |
| 5 | ZIB.icar      | 67.01016   | 100  |

| "masTSS" | "OA" | "prob" |
|----------|------|--------|
| 1        | 1    | 0.65   |

# Henipavirus- Binomial model

Iterations = 5001:9996 Thinning  
interval = 5 Number of chains = 2  
Sample size per chain = 1000

## 1. Empirical mean and standard deviation for each variable, plus standard error of the mean:

|                   | Mean      | SD       | Naive SE | Time-series SE |
|-------------------|-----------|----------|----------|----------------|
| beta.( Intercept) | -7.42157  | 0.91838  | 0.020536 | 0.148278       |
| beta.layer.1      | -2.72411  | 1.60108  | 0.035801 | 0.270781       |
| beta.layer.2      | 1.65097   | 1.30463  | 0.029172 | 0.215200       |
| beta.layer        | 2.23412   | 0.39907  | 0.008923 | 0.046655       |
| beta.lc           |           | 0.21787  | 0.28018  | 0.006265       |
| beta.alt          | -7.12888  | 1.92968  | 0.043149 | 0.308019       |
| beta. lc_modi     | 2.01717   | 0.38696  | 0.008653 | 0.026624       |
| beta.pop_den      | 0.00701   | 0.15813  | 0.003536 | 0.007293       |
| Vrho              | 9.87936   | 0.05526  | 0.001236 | 0.008422       |
| Deviance          | 113.44166 |          |          |                |
|                   | 12.32776  | 0.275657 | 0.945002 |                |

## 2. Quantiles for each variable:

|                  | 2.5%     | 25%       | 50%       | 75%      | 97.5%    |
|------------------|----------|-----------|-----------|----------|----------|
| beta.(Intercept) | -9.4726  | -8.00068  | -7.29651  | -6.8059  | -5.8840  |
| beta.layer.1     | -5.7679  | -3.82144  | -2.80242  | -1.6734  | 0.6095   |
| beta.layer.2     | -1.1103  | 0.82618   | 1.65468   | 2.5389   | 4.1226   |
| beta.layer       | 1.4294   | 1.96110   | 2.23344   | 2.5053   | 3.0142   |
| beta.lc          |          |           | 0.03295   | 0.21572  | 0.4036   |
| beta.alt         | -11.3713 | -8.22921  | -7.05425  | -5.7307  | -3.9039  |
| beta.lc_modi     | 1.2865   | 1.75444   | 2.03407   | 2.2744   | 2.7566   |
| beta.pop_den     | -0.3128  | -0.09765  | 0.01136   | 0.1141   | 0.2983   |
| Vrho             | 9.7971   | 9.83454   | 9.86940   | 9.9186   | 9.9928   |
| Deviance         | 90.6080  | 104.71929 | 112.90177 | 122.1287 | 138.1282 |

## Potential scale reduction factors:

|                  | Point est. | Upper C.I. |
|------------------|------------|------------|
| beta.(Intercept) | 1.13       | 1.46       |
| beta.layer.1     | 1.08       | 1.31       |
| beta.layer.2     | 1.11       | 1.42       |
| beta.layer       | 1.00       | 1.01       |
| beta.lc          |            |            |
| beta.alt         | 1.06       | 1.25       |
| beta.lc_modi     | 1.10       | 1.36       |
| beta.pop_den     | 1.33       | 2.03       |
| Vrho             |            |            |
| Deviance         | 1.02       | 1.10       |
|                  | 1.10       | 1.37       |
|                  | 1.09       | 1.33       |

Multivariate psrf 1.57

# Henipavirus- ZIB model

Iterations = 5001:9996 Thinning  
interval = 5 Number of chains = 2  
Sample size per chain = 1000

## 1. Empirical mean and standard deviation for each variable, plus standard error of the mean:

|                   | Mean     | SD     | Naive SE | Time-series SE |
|-------------------|----------|--------|----------|----------------|
| beta.( Intercept) | -6.1898  | 0.7317 | 0.016362 | 0.133905       |
| beta.layer.1      | -1.7241  | 0.6138 | 0.013725 | 0.060312       |
| beta.layer.2      | 0.9176   | 0.5074 | 0.011346 | 0.042359       |
| beta.layer        | 1.3295   | 0.1863 | 0.004165 | 0.012484       |
| beta.lc           | 0.2903   | 0.1405 | 0.003141 | 0.005599       |
| beta.alt          | -11.7266 | 1.5390 | 0.034413 | 0.301332       |
| beta. lc_modi     | 1.2574   | 0.1581 | 0.003536 | 0.005924       |
| beta. pop_den     | 0.1164   | 0.1256 | 0.002808 | 0.003849       |
| Deviance          | 635.2810 | 4.0968 | 0.091607 | 0.197628       |

## 2. Quantiles for each variable:

|                  | 2.5%      | 25%       | 50%      | 75%      | 97.5%    |
|------------------|-----------|-----------|----------|----------|----------|
| beta.(Intercept) | -7.77453  | -6.59967  | -6.1525  | -5.7043  | -4.9017  |
| beta.layer.1     | -2.91079  | -2.14856  | -1.7303  | -1.3177  | -0.5201  |
| beta.layer.2     | -0.08586  | 0.59115   | 0.9290   | 1.2549   | 1.9092   |
| beta.layer       | 0.96104   | 1.20545   | 1.3335   | 1.4542   | 1.6975   |
| beta.lc          | 0.01660   | 0.19248   | 0.2918   | 0.3849   | 0.5634   |
| beta.alt         | -15.08253 | -12.66530 | -11.6315 | -10.6695 | -9.0201  |
| beta.lc_modi     | 0.94251   | 1.15159   | 1.2567   | 1.3619   | 1.5712   |
| beta.pop_den     | -0.09433  | 0.02814   | 0.1078   | 0.1918   | 0.3981   |
| Deviance         | 629.32335 | 632.25033 | 634.6044 | 637.5753 | 645.0544 |

## Potential scale reduction factors:

|                  | Point est. | Upper C.I. |
|------------------|------------|------------|
| beta.(Intercept) | 1.02       | 1.11       |
| beta.layer.1     | 1.02       | 1.08       |
| beta.layer.2     | 1.02       | 1.07       |
| beta.layer       | 1.01       | 1.05       |
| beta.lc          | 1.00       | 1.02       |
| beta.alt         | 1.00       | 1.02       |
| beta.lc_modi     | 1.02       | 1.08       |
| beta.pop_den     | 1.00       | 1.00       |
| Deviance         | 1.00       | 1.00       |
|                  | 1.00       | 1.00       |

## Multivariate psrf

1.04

# Henipavirus- Binomial iCAR model

Iterations = 5001:9996 Thinning  
interval = 5 Number of chains = 2  
Sample size per chain = 1000

## 1. Empirical mean and standard deviation for each variable, plus standard error of the mean:

|                   | Mean     | SD      | Naive SE | Time-series SE |
|-------------------|----------|---------|----------|----------------|
| beta.(Intercept)  | -5.7849  | 0.8117  | 0.018151 | 0.157069       |
| beta.layer.1      | -1.2758  | 0.6525  | 0.014590 | 0.067635       |
| beta.layer.2      | 0.2252   | 0.6628  | 0.014820 | 0.084433       |
| beta.layer        | 1.2112   | 0.2052  | 0.004588 | 0.017493       |
| beta.lc           | 0.3060   | 0.1564  | 0.003498 | 0.006503       |
| beta.alt          | -11.6670 | 1.3888  | 0.031054 | 0.238654       |
| beta.lc_modi      | 0.7398   | 0.3380  | 0.007558 | 0.045304       |
| beta.pop_den      | 1.7751   | 1.2008  | 0.026851 | 0.197678       |
| gamma.(Intercept) | 6.9297   | 10.3305 | 0.230997 | 2.579533       |
| Deviance          | 627.4858 | 4.7735  | 0.106739 | 0.475115       |

## 2. Quantiles for each variable:

|                   | 2.5%      | 25%      | 50%      | 75%      | 97.5%     |
|-------------------|-----------|----------|----------|----------|-----------|
| beta.(Intercept)  | -7.27209  | -6.3586  | -5.8325  | -5.2327  | -4.25214  |
| beta.layer.1      | -2.56459  | -1.7053  | -1.2951  | -0.8435  | 0.06333   |
| beta.layer.2      | -1.14806  | -0.1876  | 0.2455   | 0.7096   | 1.40811   |
| beta.layer        | 0.79719   | 1.0828   | 1.2055   | 1.3445   | 1.60444   |
| beta.lc           | 0.01016   | 0.2008   | 0.3048   | 0.4091   | 0.61377   |
| beta.alt          | -14.60397 | -12.5680 | -11.6711 | -10.6569 | -9.26813  |
| beta.lc_modi      | 0.03019   | 0.5245   | 0.7775   | 0.9734   | 1.32638   |
| beta.pop_den      | 0.10213   | 0.9022   | 1.3065   | 2.6855   | 4.41259   |
| gamma.(Intercept) | 2.69122   | 3.4291   | 4.0987   | 5.2802   | 47.80220  |
| Deviance          | 620.68101 | 624.0309 | 626.6045 | 630.1071 | 639.03774 |

## Potential scale reduction factors:

|                   | Point est. | Upper C.I. |
|-------------------|------------|------------|
| beta.(Intercept)  | 1.01       | 1.04       |
| beta.layer.1      | 1.01       | 1.03       |
| beta.layer.2      | 1.02       | 1.08       |
| beta.layer        | 1.00       | 1.01       |
| beta.lc           | 1.00       | 1.01       |
| beta.alt          | 1.01       | 1.03       |
| beta.lc_modi      | 1.01       | 1.03       |
| beta.pop_den      | 1.01       | 1.01       |
|                   | 1.03       | 1.14       |
|                   | 1.02       | 1.10       |
| gamma.(Intercept) | 1.36       | 3.62       |
| Deviance          | 1.04       | 1.12       |

**Multivariate psrf 1.08**

# Henipavirus- ZIB iCAR model

Iterations = 5001:9996 Thinning  
interval = 5 Number of chains = 2  
Sample size per chain = 1000

## 1. Empirical mean and standard deviation for each variable, plus standard error of the mean:

|                   | Mean       | SD        | Naive SE  | Time-series SE |
|-------------------|------------|-----------|-----------|----------------|
| beta.( Intercept) | -8.271041  | 1.10538   | 0.024717  | 0.245798       |
| beta.layer.1      | -3.651963  | 1.37054   | 0.030646  | 0.196258       |
| beta.layer.2      | 2.353747   | 1.13634   | 0.025409  | 0.176039       |
| beta.layer        | 2.413694   | 0.41139   | 0.009199  | 0.040010       |
| beta.lc           | 0.291016   | 0.26851   | 0.006004  | 0.015301       |
| beta.alt          | -9.052617  | 2.42205   | 0.054159  | 0.534230       |
| beta.lc_modi      | 2.135840   | 0.36923   | 0.008256  | 0.025867       |
| beta.pop_den      | 0.003795   | 0.15525   | 0.003472  | 0.006192       |
| gamma.(Intercept) | 817.584802 | 628.33554 | 14.050010 | 18.905331      |
| Vrho              | 9.881421   | 0.05772   | 0.001291  | 0.009663       |
| Deviance          | 12.93415   | 0.289216  | 0.828173  | 116.763581     |

## 2. Quantiles for each variable:

|                   | 2.5%      | 25%       | 50%        | 75%       |
|-------------------|-----------|-----------|------------|-----------|
| beta.(Intercept)  | -11.53154 | -8.83573  | -8.194535  | -7.5847   |
| beta.layer.1      | -6.26383  | -4.49145  | -3.666831  | -2.8802   |
| beta.layer.2      | -0.02205  | 1.66728   | 2.354603   | 3.0980    |
| beta.layer        | 1.61763   | 2.13063   | 2.427338   | 2.7051    |
| beta.lc           |           |           | 0.11038    | 0.289858  |
| beta.alt          |           |           |            | 0.4652    |
| beta.lc_modi      | -16.27392 | -10.31546 | -8.840097  | -7.5964   |
|                   | 1.41220   | 1.88832   | 2.125123   | 2.3858    |
| beta.pop_den      | -0.30820  | -0.09714  | 0.003661   | 0.1105    |
| gamma.(Intercept) | 51.19336  | 321.06399 | 676.766416 | 1198.1010 |
| Vrho              | 9.79906   | 9.83378   | 9.867952   | 9.9227    |
| Deviance          | 93.46029  | 107.92418 | 115.857036 | 124.5996  |
|                   | 97.5%     |           |            |           |
| beta.(Intercept)  | -6.3486   |           |            |           |
| beta.layer.1      | -         | 0.6572    |            |           |
| beta.layer.2      |           | 4.5281    |            |           |
| beta.layer        |           | 3.1192    |            |           |
| beta.lc           |           | 0.8251    |            |           |
| beta.alt          |           | -4.9500   |            |           |
| beta.lc_modi      |           | 2.8822    |            |           |
| beta.pop_den      |           | 0.3041    |            |           |
| gamma.(Intercept) |           | 2297.7514 |            |           |
| Vrho              |           | 9.9944    |            |           |
| Deviance          |           | 144.9087  |            |           |

## Potential scale reduction factors:

|                          | Point est. Upper C.I. |      |
|--------------------------|-----------------------|------|
| beta.(Intercept)         | 1.10                  | 1.10 |
| beta.layer.1             | 1.11                  | 1.25 |
| beta.layer.2             | 1.06                  | 1.15 |
| beta.layer               | 1.20                  | 1.38 |
| beta.lc                  | 1.01                  | 1.01 |
| beta.lc_modi             | 1.10                  | 1.14 |
| beta.pop_den             | 1.08                  | 1.20 |
|                          | 1.02                  | 1.08 |
| gamma.(Intercept)        | 1.00                  | 1.00 |
| Vrho Deviance            | 1.18                  | 1.33 |
| <b>Multivariate psrf</b> | 1.07                  | 1.27 |

1.18

|   | Model         | Deviance  | Perc |
|---|---------------|-----------|------|
| 1 | NULL          | 1862.7433 | 0    |
| 2 | env           | 627.4858  | 71   |
| 3 | binomial      | 635.2810  | 70   |
| 4 | binomial.icar | 113.4417  | 100  |
| 5 | ZIB.icar      | 116.7636  | 100  |

| "masTSS" | "OA" | "prob" |
|----------|------|--------|
| 0.99     | 1    | 0.48   |

**Filoviridae- Evolution of TSS**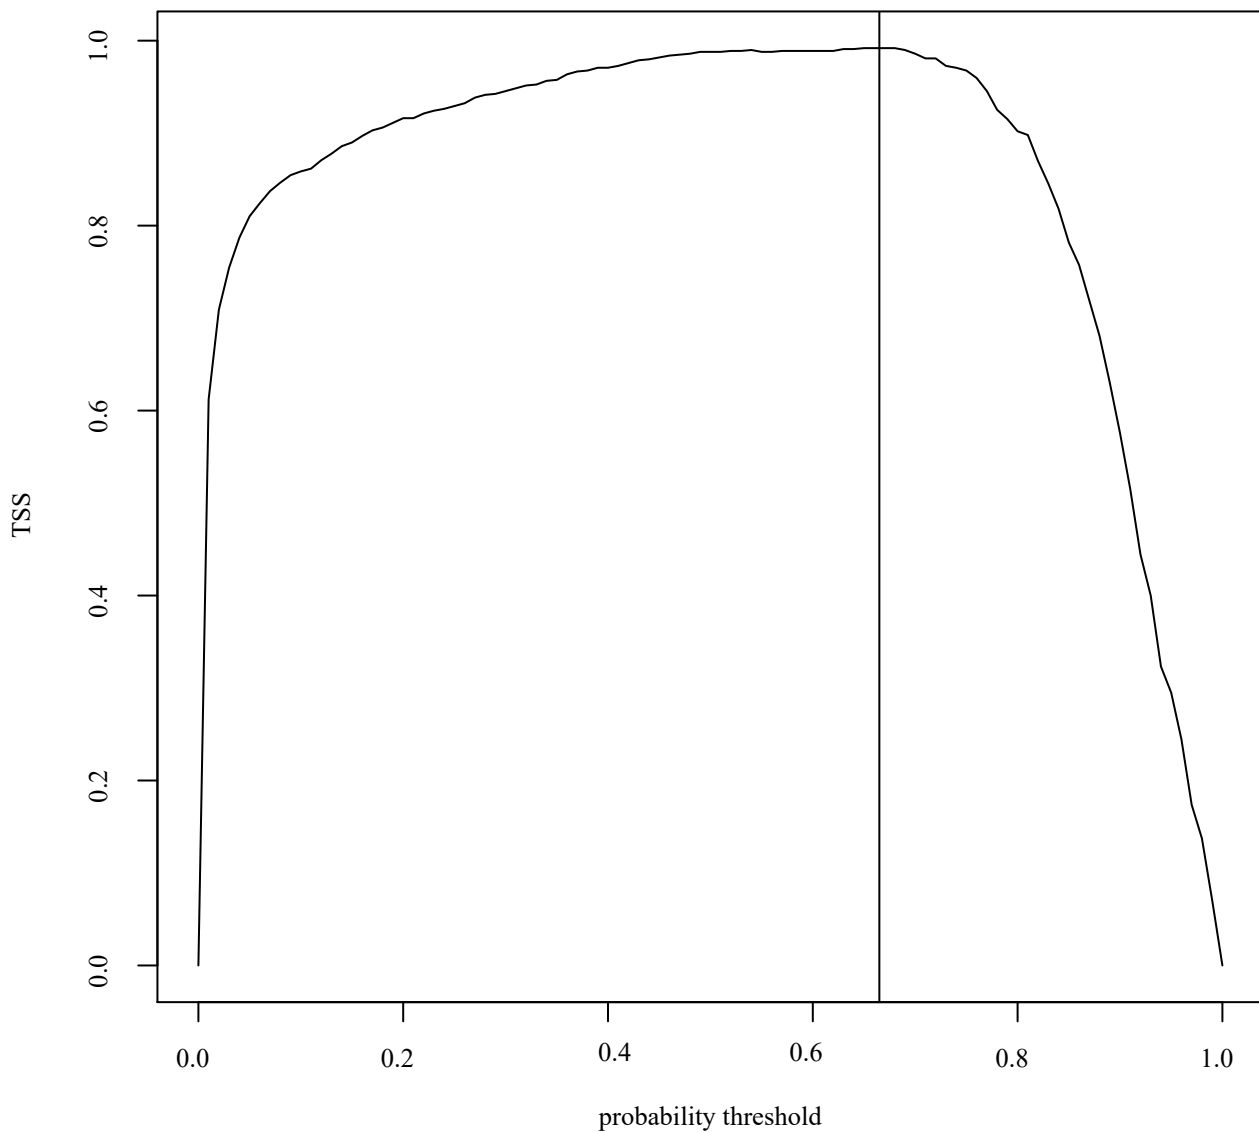



**Coronaviridae- Evolution of TSS**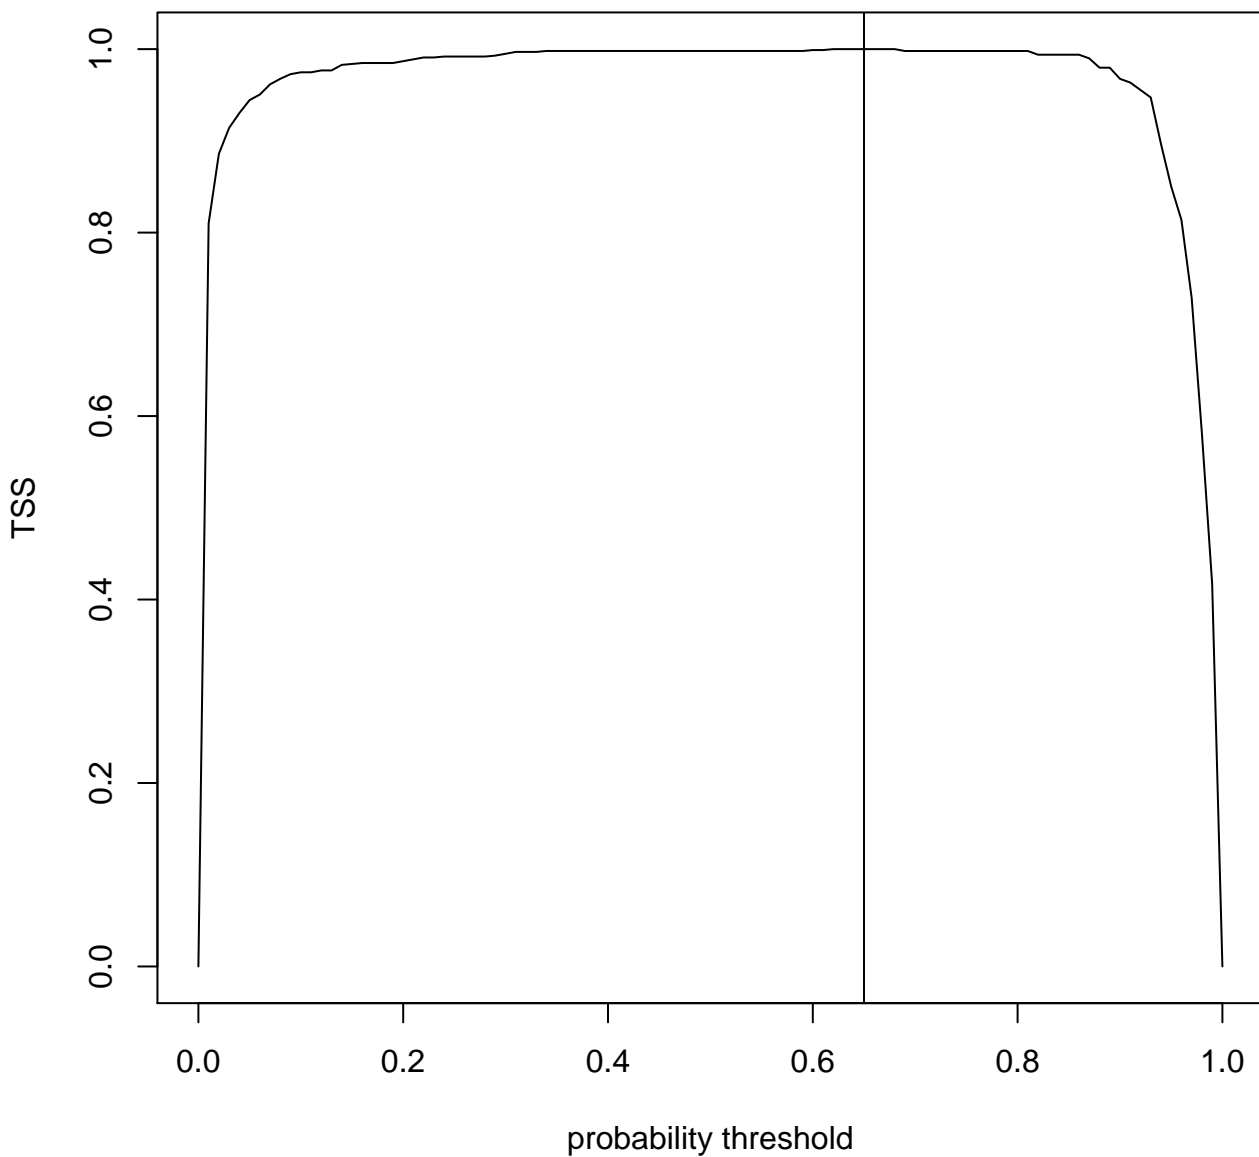

Figure S2: True Skill Statistic (TSS) plots

Henipavirus - Evolution of TSS

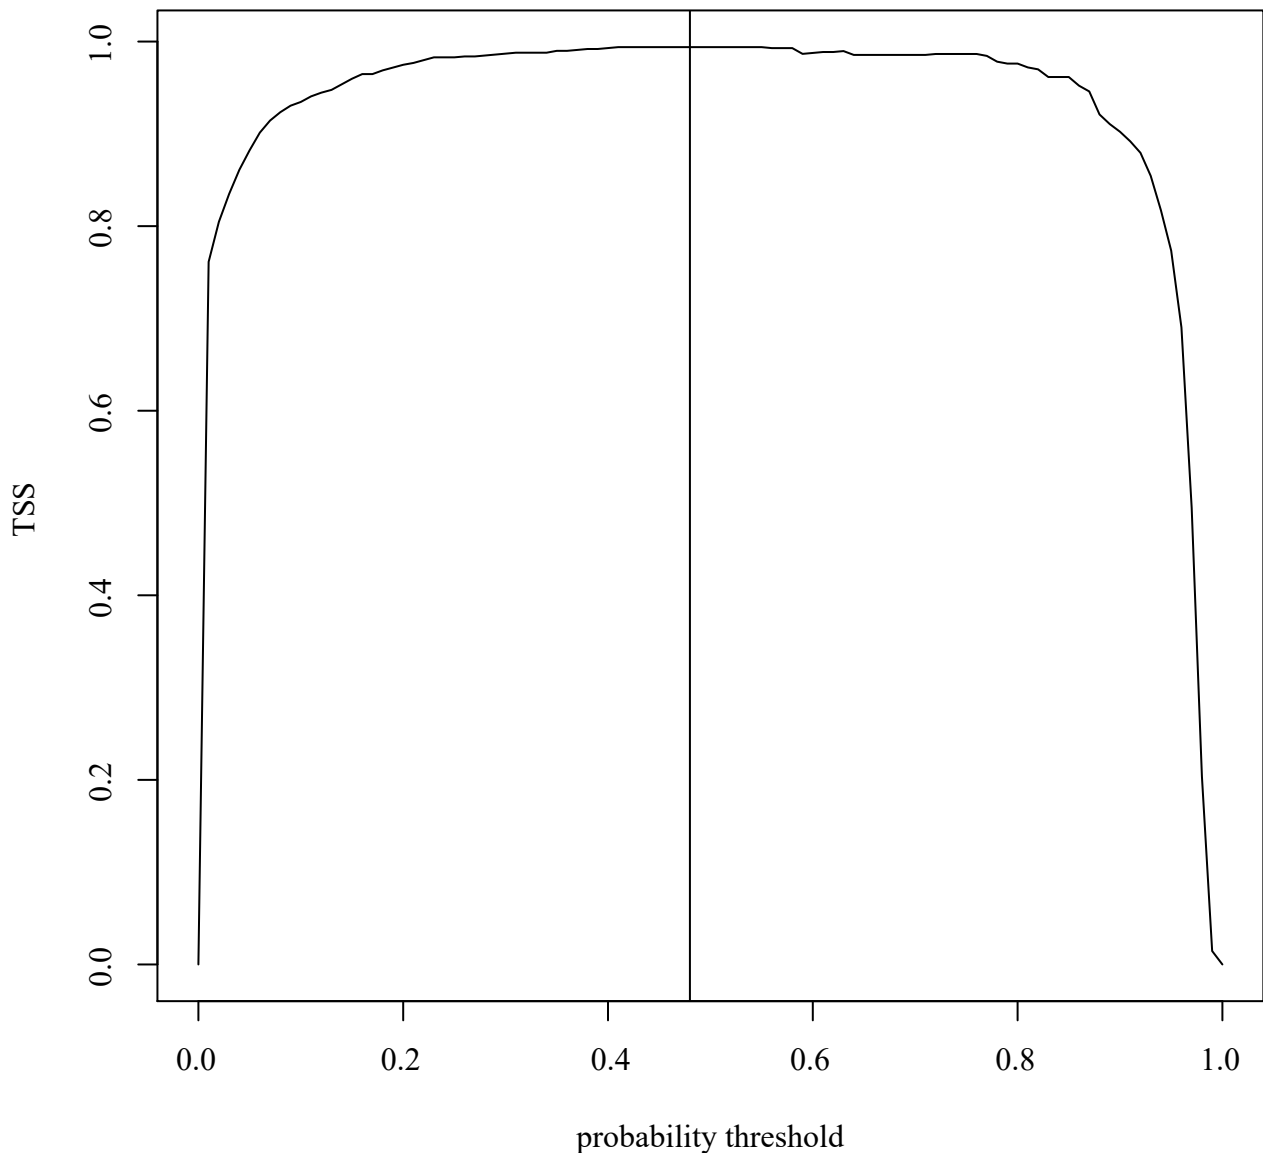

# Filoviridae- ZIB iCAR model Random effects

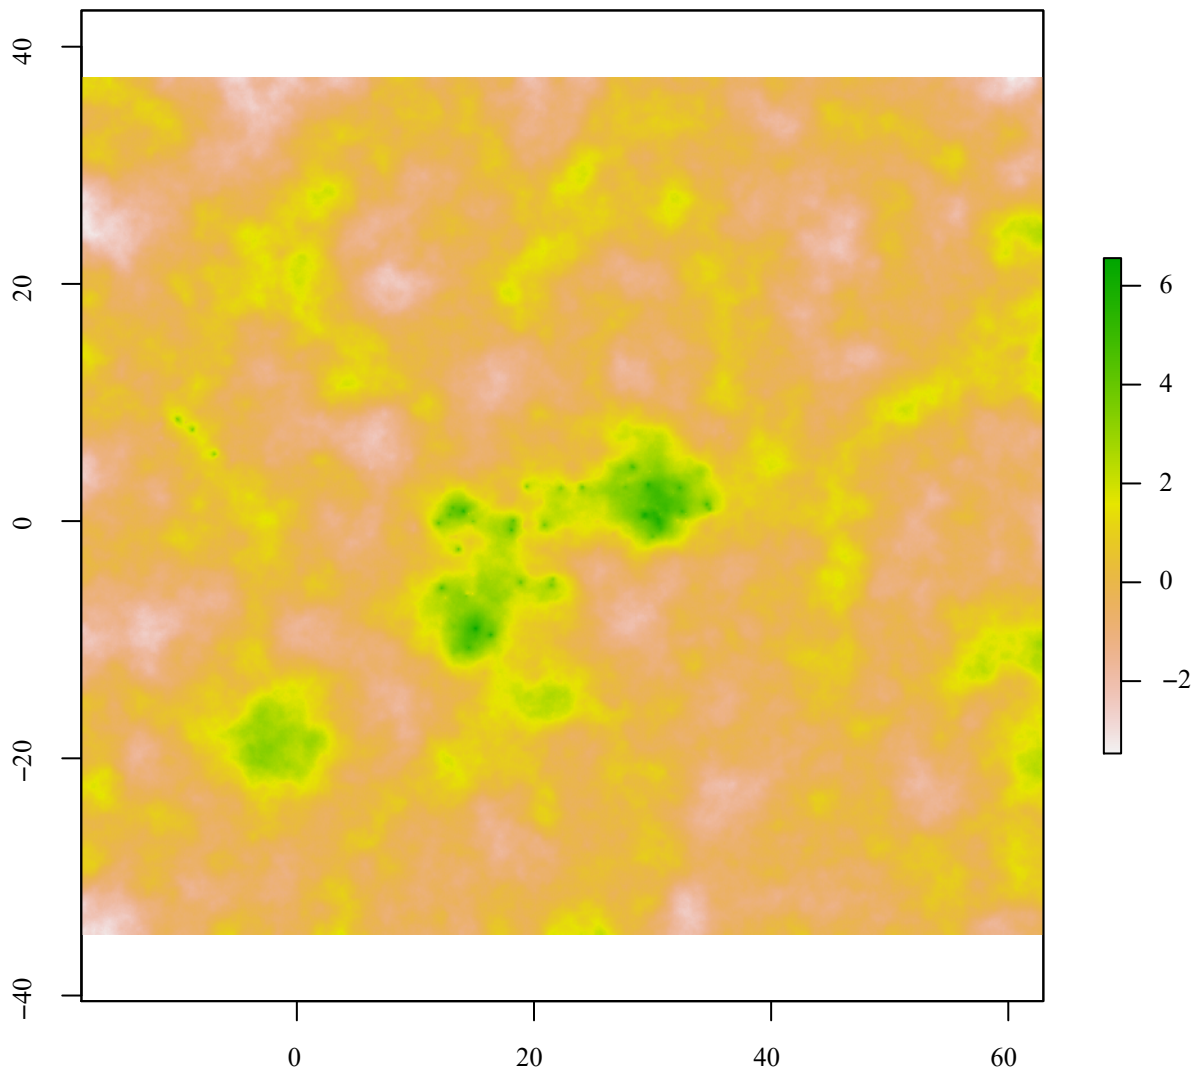

Figure S3: ZIB  
iCAR random effects

**Coronaviridae- ZIB iCAR model Random effects**  
**Inclusion of SARS CoV 2 origins**

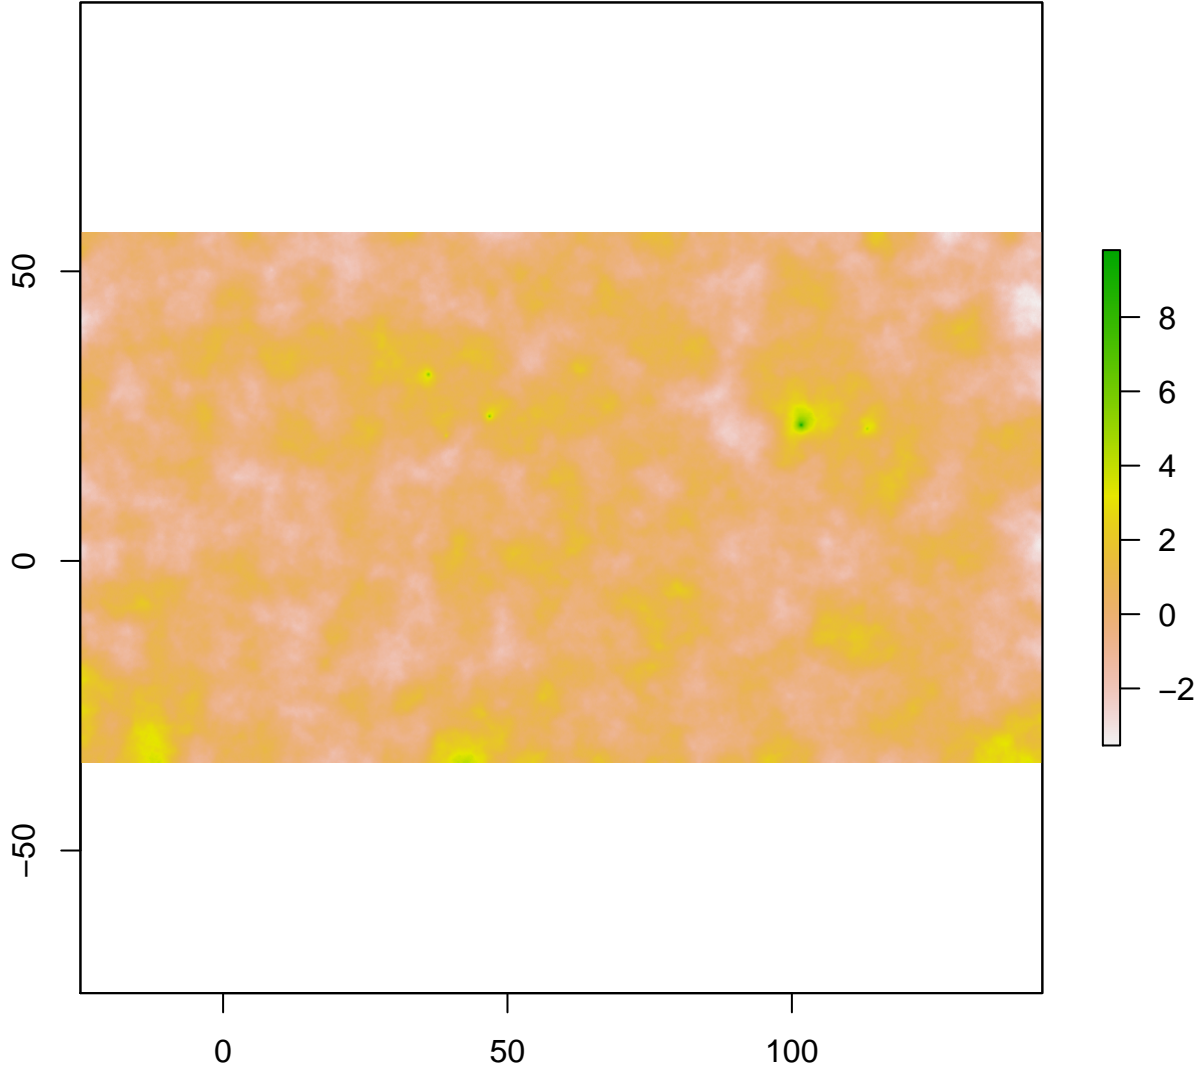

Figure S3: ZIB  
iCAR random effects

Henipavirus- ZIB iCAR model Random effects

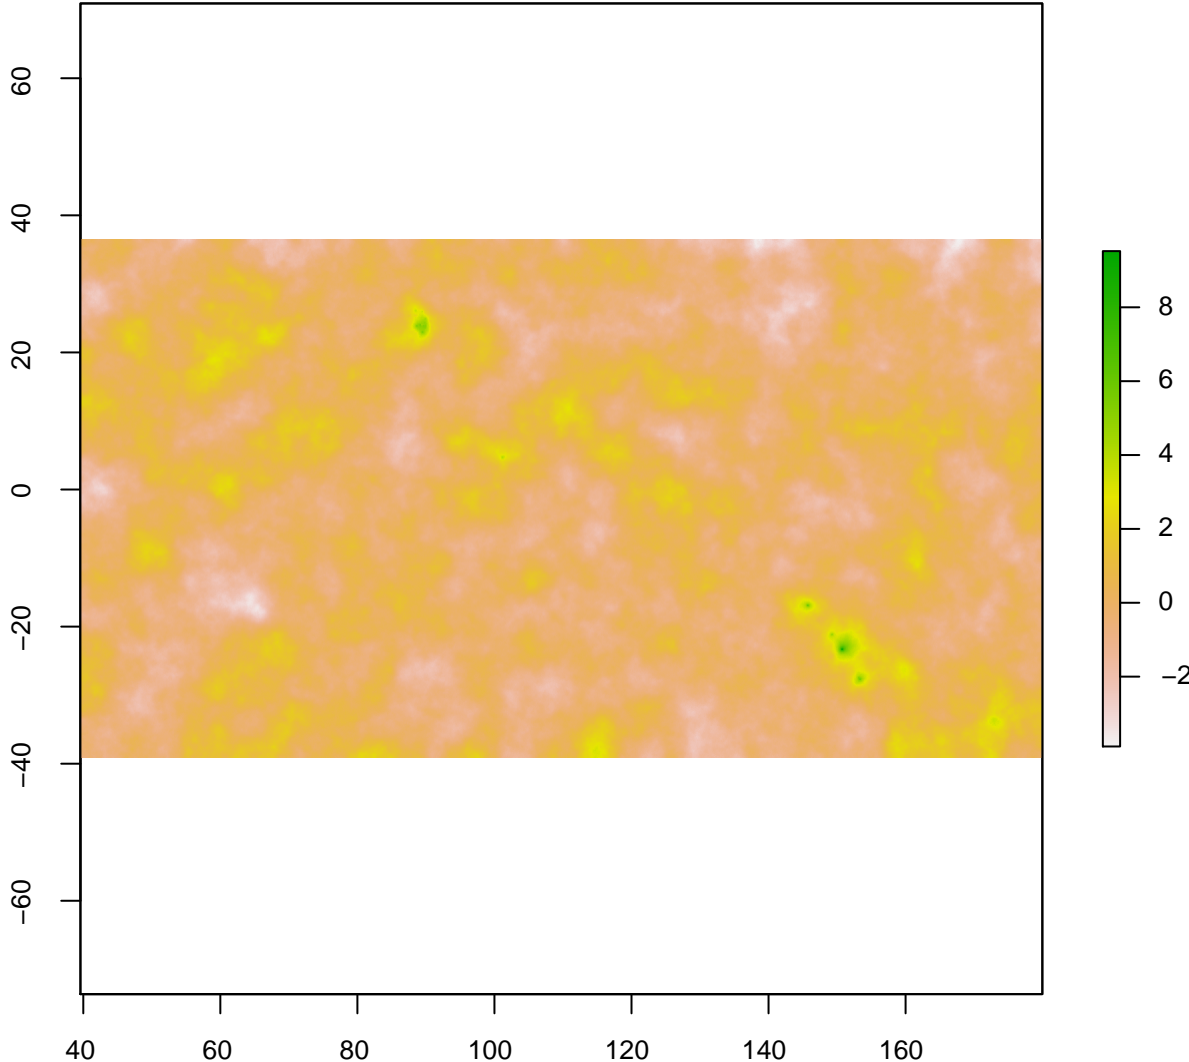

Figure S4: Significant hotspots based on TSS

**Filoviridae hotspots with detection >TSS threshold**

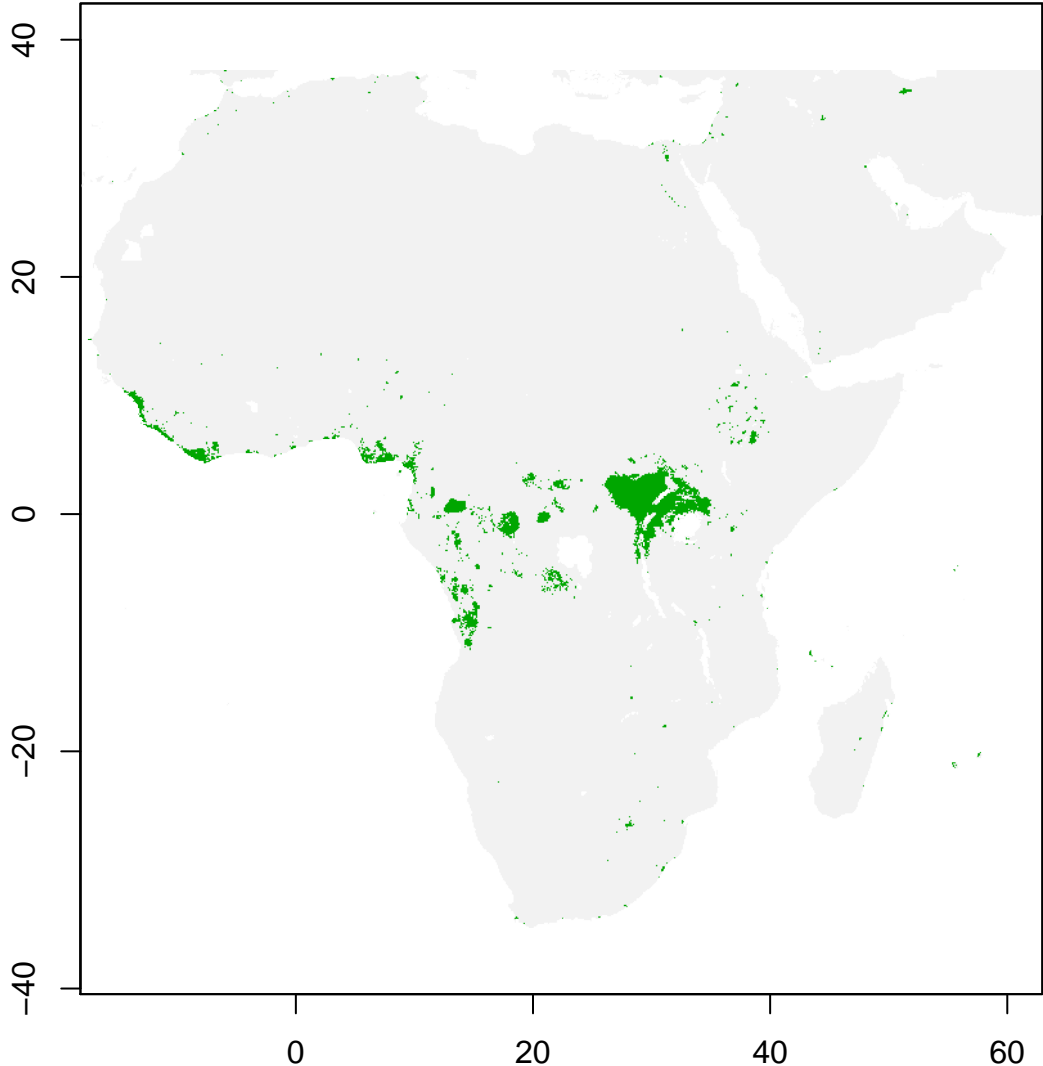

Figure S4: Significant hotspots based on TSS

**Coronaviridae hotspots with detection >TSS threshold**

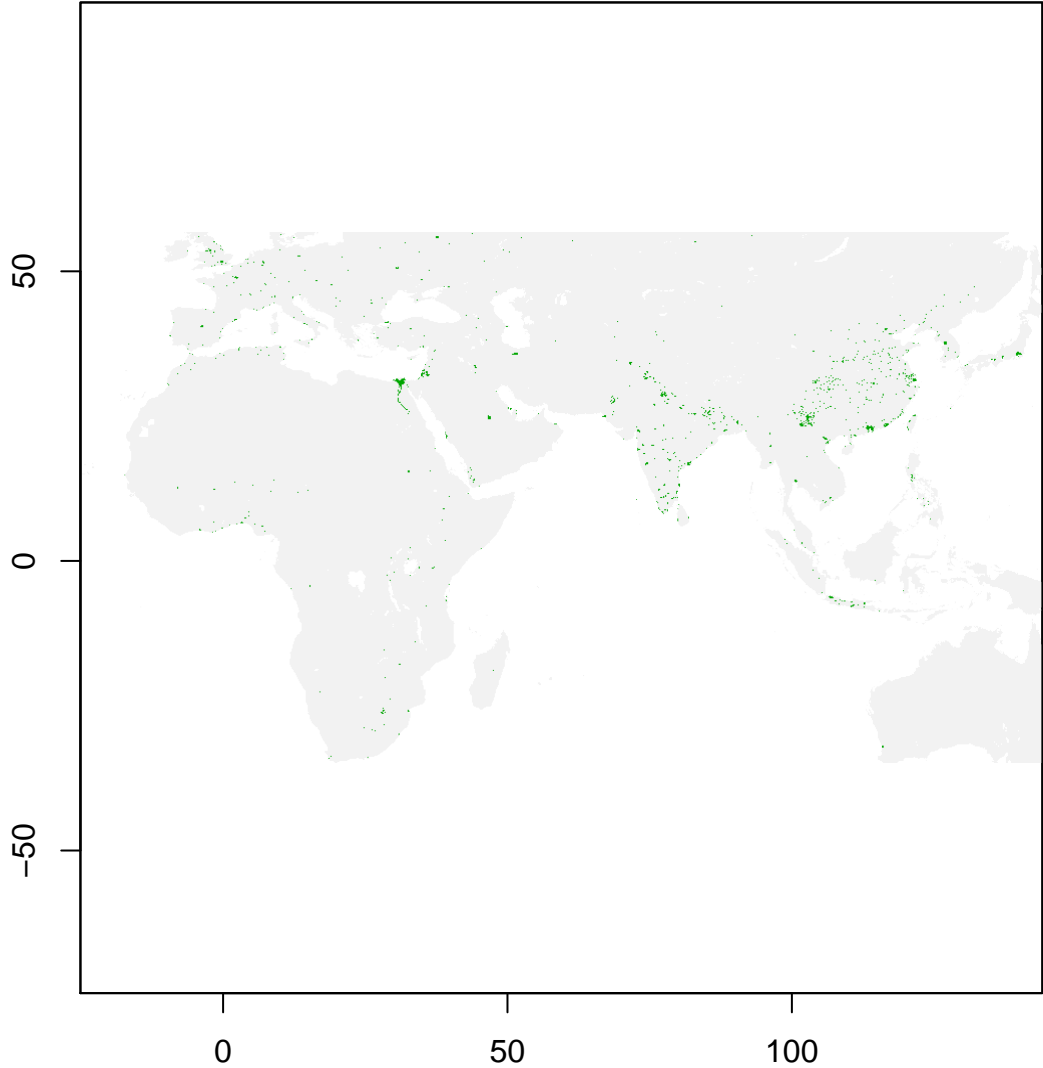

Figure S4: Significant hotspots based on TSS

**Henpavirus hotspots with detection >TSS threshold**

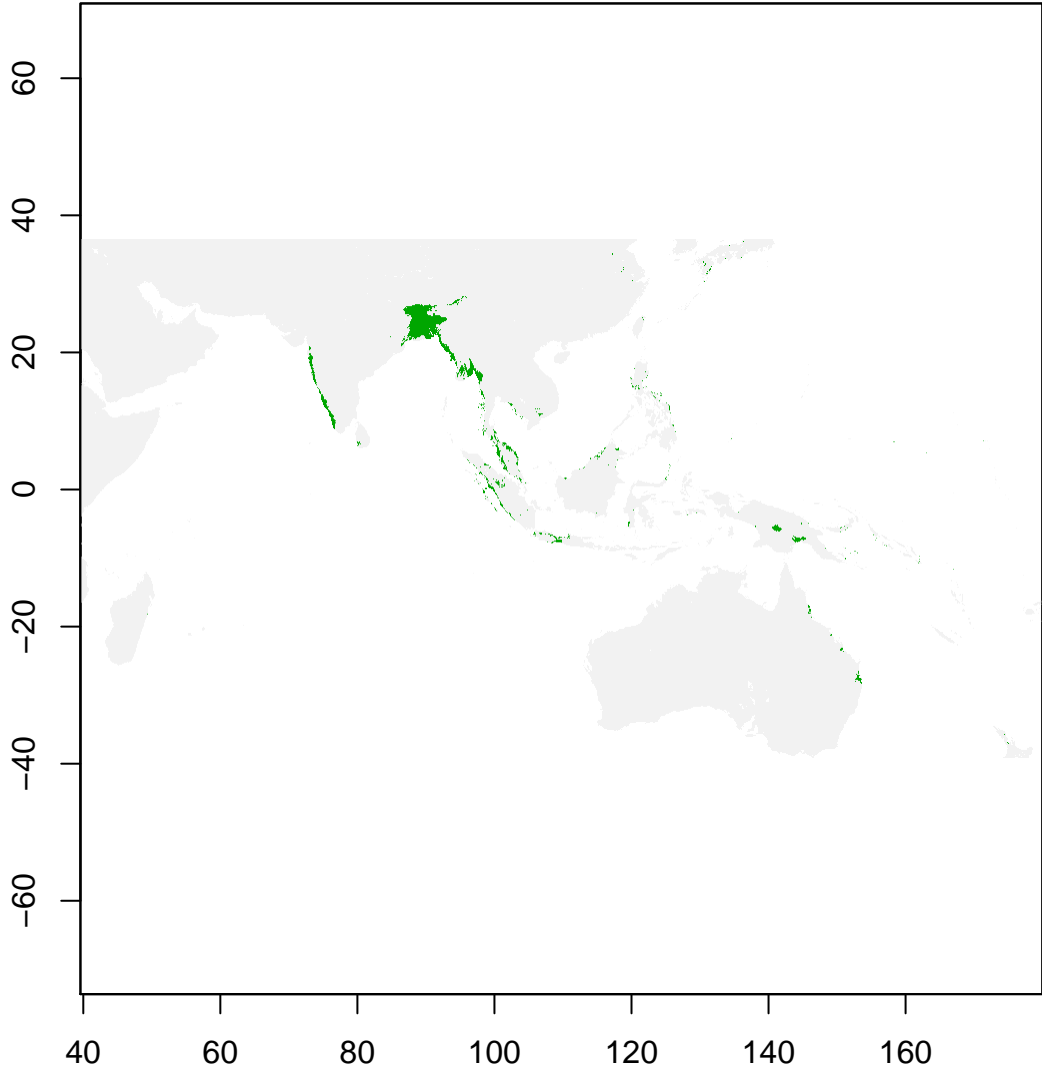



**Supplementary Table 1: Reservoirs of diseases analyzed in the study**

| <b>Virus</b> | <b>Reservoir</b>         | <b>Binomial</b>         |
|--------------|--------------------------|-------------------------|
| MERS         | serotine bat             | Neoromicia_zuluensis    |
| MERS         | Egyptian tomb bat        | Taphozous_perforatus    |
| MERS         | bat                      | Rhinopoma_microphyllum  |
| MERS         | bat                      | Pipistrellus_kuhlii     |
| MERS         | bat                      | Eptesicus_bottae        |
| MERS         | bat                      | Eidolon_helvum          |
| MERS         | bat                      | Rousettus_aegyptiacus   |
| Henipavirus  | fruit bats/ flying foxes | Pteropus_anetianus      |
| Henipavirus  | fruit bats/ flying foxes | Pteropus_aruensis       |
| Henipavirus  | fruit bats/ flying foxes | Pteropus_caniceps       |
| Henipavirus  | fruit bats/ flying foxes | Pteropus_capistratus    |
| Henipavirus  | fruit bats/ flying foxes | Pteropus_chrysoproctus  |
| Henipavirus  | fruit bats/ flying foxes | Pteropus_cognatus       |
| Henipavirus  | fruit bats/ flying foxes | Pteropus_conspicillatus |
| Henipavirus  | fruit bats/ flying foxes | Pteropus_dasymallus     |
| Henipavirus  | fruit bats/ flying foxes | Pteropus_faunulus       |
| Henipavirus  | fruit bats/ flying foxes | Pteropus_fundatus       |
| Henipavirus  | fruit bats/ flying foxes | Pteropus_giganteus      |
| Henipavirus  | fruit bats/ flying foxes | Pteropus_gilliardorum   |
| Henipavirus  | fruit bats/ flying foxes | Pteropus_griseus        |
| Henipavirus  | fruit bats/ flying foxes | Pteropus_howensis       |
| Henipavirus  | fruit bats/ flying foxes | Pteropus_hypomelanus    |

|             |                          |                        |
|-------------|--------------------------|------------------------|
| Henipavirus | fruit bats/ flying foxes | Pteropus_intermedius   |
| Henipavirus | fruit bats/ flying foxes | Pteropus_keyensis      |
| Henipavirus | fruit bats/ flying foxes | Pteropus_leucopterus   |
| Henipavirus | fruit bats/ flying foxes | Pteropus_livingstonii  |
| Henipavirus | fruit bats/ flying foxes | Pteropus_lombocensis   |
| Henipavirus | fruit bats/ flying foxes | Pteropus_loochoensis   |
| Henipavirus | fruit bats/ flying foxes | Pteropus_leyi          |
| Henipavirus | fruit bats/ flying foxes | Pteropus_macrotis      |
| Henipavirus | fruit bats/ flying foxes | Pteropus_mahaganus     |
| Henipavirus | fruit bats/ flying foxes | Pteropus_mariannus     |
| Henipavirus | fruit bats/ flying foxes | Pteropus_melanopogon   |
| Henipavirus | fruit bats/ flying foxes | Pteropus_melanotus     |
| Henipavirus | fruit bats/ flying foxes | Pteropus_molossinus    |
| Henipavirus | fruit bats/ flying foxes | Pteropus_neohibernicus |
| Henipavirus | fruit bats/ flying foxes | Pteropus_niger         |
| Henipavirus | fruit bats/ flying foxes | Pteropus_nitendiensis  |
| Henipavirus | fruit bats/ flying foxes | Pteropus_ocularis      |
| Henipavirus | fruit bats/ flying foxes | Pteropus_ornatus       |
| Henipavirus | fruit bats/ flying foxes | Pteropus_pelewensis    |
| Henipavirus | fruit bats/ flying foxes | Pteropus_personatus    |
| Henipavirus | fruit bats/ flying foxes | Pteropus_pohlei        |
| Henipavirus | fruit bats/ flying foxes | Pteropus_poliocephalus |
| Henipavirus | fruit bats/ flying foxes | Pteropus_pselaphon     |
| Henipavirus | fruit bats/ flying foxes | Pteropus_pumilus       |

|             |                                 |                           |
|-------------|---------------------------------|---------------------------|
| Henipavirus | fruit bats/ flying foxes        | Pteropus_rayneri          |
| Henipavirus | fruit bats/ flying foxes        | Pteropus_rennelli         |
| Henipavirus | fruit bats/ flying foxes        | Pteropus_rodricensis      |
| Henipavirus | fruit bats/ flying foxes        | Pteropus_rufus            |
| Henipavirus | fruit bats/ flying foxes        | Pteropus_samoensis        |
| Henipavirus | fruit bats/ flying foxes        | Pteropus_scapulatus       |
| Henipavirus | fruit bats/ flying foxes        | Pteropus_seychellensis    |
| Henipavirus | fruit bats/ flying foxes        | Pteropus_speciosus        |
| Henipavirus | fruit bats/ flying foxes        | Pteropus_temminckii       |
| Henipavirus | fruit bats/ flying foxes        | Pteropus_tonganus         |
| Henipavirus | fruit bats/ flying foxes        | Pteropus_tuberculatus     |
| Henipavirus | fruit bats/ flying foxes        | Pteropus_ualanus          |
| Henipavirus | fruit bats/ flying foxes        | Pteropus_vampyrus         |
| Henipavirus | fruit bats/ flying foxes        | Pteropus_vetulus          |
| Henipavirus | fruit bats/ flying foxes        | Pteropus_voeltzkowi       |
| Henipavirus | fruit bats/ flying foxes        | Pteropus_woodfordi        |
| EVD         | Greater Long-fingered bat       | Miniopterus_inflatus      |
| EVD         | Franquet's epauletted fruit bat | Epomops_franqueti         |
| EVD         | hammer-headed fruit bat         | Hypsignathus_monstrosus   |
| EVD         | little collared fruit bats      | Myonycteris_torquata      |
| MVD         | Egyptian fruit bat              | Rousettus_aegyptiacus     |
| SARS        | Greater horseshoe bat           | Rhinolophus_ferrumequinum |
| SARS        | civet                           | Paguma_larvata            |

# Coronaviridae- Binomial model Inclusion of SARS CoV-2 origin

Iterations = 5001:9996 Thinning  
interval = 5 Number of chains = 2  
Sample size per chain = 1000

## 1. Empirical mean and standard deviation for each variable, plus standard error of the mean:

|                   | Mean      | SD        | Naive SE  | Time-series SE |                 |
|-------------------|-----------|-----------|-----------|----------------|-----------------|
| beta.( Intercept) | -4.7390   | 0.28041   | 0.0062701 |                | 0.034669        |
| beta.layer.1      | 3.5341    | 0.97653   | 0.0218358 |                | 0.169654        |
| beta.layer.2      | -2.4537   | 0.86143   | 0.0192622 |                | 0.146552        |
| beta.layer        | -0.9982   | 0.45390   | 0.0101494 |                | 0.058780 0.4306 |
| beta.lc           | 0.27230   | 0.0060888 | 0.015987  | 0.7419         | 0.33981         |
| beta.alt          | 0.0075984 | 0.032927  |           |                |                 |
| beta. lc_modi     | 1.2297    | 0.25588   | 0.0057216 |                | 0.016796        |
| beta. pop_den     | 0.6959    | 0.38004   | 0.0084979 |                | 0.018124        |
| Vrho              | 9.9363    | 0.04228   | 0.0009454 |                | 0.006303        |
| Deviance          | 167.5602  | 20.00579  | 0.4473430 |                | 4.263603        |

## 2. Quantiles for each variable:

|                  | 2.5%      | 25%      | 50%          | 75%          | 97.5%    |         |
|------------------|-----------|----------|--------------|--------------|----------|---------|
| beta.(Intercept) | -5.29025  | -4.9219  | -4.7412      | -4.5516      | -4.1893  |         |
| beta.layer.1     | 1.95791   | 2.8337   | 3.4249       | 4.0775       | 5.8057   |         |
| beta.layer.2     | -4.54382  | -3.0043  | -2.3280      | -1.8164      | -1.1100  |         |
| beta.layer       | -1.94214  | -1.2997  | -0.9614      | -0.6568      | -0.1935  | beta.lc |
| -0.06632         | 0.2348    | 0.4243   | 0.6151       | 0.9767       | beta.alt | 0.04202 |
| 0.5225           | 0.7425    | 0.9846   | 1.3649       | beta.lc_modi | 0.75666  | 1.0526  |
| 1.2249           | 1.3973    | 1.7489   | beta.pop_den | 0.03395      | 0.4101   | 0.6681  |
| 0.9602           | 1.4821    |          |              |              |          |         |
| Vrho             | 9.84410   | 9.9070   | 9.9430       | 9.9710       | 9.9968   |         |
| Deviance         | 134.46400 | 153.4041 | 165.3311     | 179.1117     | 213.7345 |         |

## Potential scale reduction factors:

|                  | Point est. | Upper C.I. |
|------------------|------------|------------|
| beta.(Intercept) | 1.16       | 1.56       |
| beta.layer.1     | 1.15       | 1.52       |
| beta.layer.2     | 1.10       | 1.37       |
| beta.layer       | 1.24       | 1.78       |
| beta.lc          | 1.31       | 1.98       |
| beta.alt         | 1.01       | 1.04       |
| beta.lc_modi     | 1.01       | 1.03       |
| beta.pop_den     | 1.01       | 1.01       |
| Vrho             | 1.01       | 1.01       |
| Deviance         | 1.27       | 1.95       |

Multivariate psrf 1.69

# Coronaviridae- ZIB model

## Inclusion of SARS CoV-2 origin

Iterations = 5001:9996 Thinning  
interval = 5 Number of chains = 2  
Sample size per chain = 1000

### 1. Empirical mean and standard deviation for each variable, plus standard error of the mean:

|                   | Mean      | SD       | Naive SE | Time-series SE |
|-------------------|-----------|----------|----------|----------------|
| beta.( Intercept) | -1.0375   | 0.08718  | 0.001949 | 0.003691       |
| beta.layer.1      | 2.5893    | 0.38003  | 0.008498 | 0.058296       |
| beta.layer.2      | -1.7417   | 0.33506  | 0.007492 | 0.048560       |
| beta.layer        | -0.6705   | 0.15486  | 0.003463 | 0.015303       |
| beta.lc           | 0.10546   | 0.002358 | 0.003524 | 0.9007         |
| beta.alt          | 0.002467  | 0.008849 |          | 0.11034        |
| beta.lc_modi      |           |          |          |                |
| beta.pop_den      | 1.2216    | 0.10344  | 0.002313 | 0.003691       |
| Deviance          | 0.8019    | 0.24268  | 0.005427 | 0.007636       |
|                   | 1285.5064 | 4.31098  | 0.096397 | 0.279522       |

### 2. Quantiles for each variable:

|                  | 2.5%      | 25%       | 50%       | 75%       |
|------------------|-----------|-----------|-----------|-----------|
| beta.(Intercept) | -1.2049   | -1.0953   | -1.0379   | -0.9791   |
| beta.layer.1     | 1.8054    | 2.3529    | 2.5974    | 2.8567    |
| beta.layer.2     | -2.3346   | -1.9802   | -1.7525   | -1.5269   |
| beta.layer       | -0.9784   | -0.7766   | -0.6667   | -0.5633   |
| beta.lc          | 0.1132    | 0.2431    | 0.3184    | 0.3861    |
| beta.alt         | 0.6775    | 0.8264    | 0.9014    | 0.9764    |
| beta.lc_modi     | 1.0218    | 1.1541    | 1.2215    | 1.2889    |
| beta.pop_den     | 0.3647    | 0.6365    | 0.7873    | 0.9641    |
| Deviance         | 1279.4800 | 1282.4205 | 1284.7211 | 1287.7234 |
| 97.5%beta.       |           |           |           |           |
| (Intercept)      | -0.8671   |           |           |           |
| beta.layer.1     | 3.2889    |           |           |           |
| beta.layer.2     | -1.0756   |           |           |           |
| beta.layer       | -0.3737   |           |           |           |
| beta.lc          | 0.5219    |           |           |           |
| beta.alt         | 1.1200    |           |           |           |
| beta.lc_modi     |           |           |           |           |
| beta.pop_den     | 1.4294    |           |           |           |
| Deviance         | 1.2899    |           |           |           |
|                  | 1296.0396 |           |           |           |

### Potential scale reduction factors:

|                  | Point est. | Upper C.I. |
|------------------|------------|------------|
| beta.(Intercept) | 1.01       | 1.02       |
| beta.layer.1     | 1.08       | 1.19       |
| beta.layer.2     | 1.07       | 1.16       |
| beta.layer       | 1.04       | 1.11       |

|              |      |      |
|--------------|------|------|
| beta.lc      | 1.00 | 1.02 |
| beta.alt     | 1.01 | 1.05 |
| beta.lc_modi | 1.00 | 1.01 |
| beta.pop_den | 1.00 | 1.00 |
| Deviance     | 1.02 | 1.06 |

**Multivariate psrf**

**1.03**

# Coronaviridae- Binomial iCAR model

## Inclusion of SARS CoV-2 origin

Iterations = 5001:9996 Thinning  
interval = 5 Number of chains = 2  
Sample size per chain = 1000

### 1. Empirical mean and standard deviation for each variable, plus standard error of the mean:

|                    | Mean      | SD       | Naive SE | Time-series SE |
|--------------------|-----------|----------|----------|----------------|
| beta.( Intercept)  | 1.3221    | 0.5269   | 0.011782 | 0.083936       |
| beta.layer.1       | 1.9397    | 0.5659   | 0.012655 | 0.094587       |
| beta.layer.2       | -0.9727   | 0.5200   | 0.011628 | 0.089489       |
| beta.layer         | 0.2343    | 0.005239 | 0.027425 | 0.2138         |
| beta.lc            | 0.003044  | 0.006156 | 1.0704   | 0.1692         |
| beta.alt           | 0.012079  |          |          | 0.003782       |
| beta.lc_modi       |           |          |          |                |
| beta.pop_den       | 1.3130    | 0.2429   | 0.005431 | 0.012950       |
|                    | 10.2581   | 2.1242   | 0.047498 | 0.333385       |
| gamma.( Intercept) | 1.3278    | 0.2088   | 0.004668 | 0.015005       |
| Deviance           | 1238.1997 | 4.4458   | 0.099410 | 0.267020       |

### 2. Quantiles for each variable:

|                   | 2.5%       | 25%       | 50%       | 75%       |
|-------------------|------------|-----------|-----------|-----------|
| beta.( Intercept) | 0.40655    | 0.9159    | 1.2808    | 1.7086    |
| beta.layer.1      | 1.00704    | 1.5414    | 1.8677    | 2.2640    |
| beta.layer.2      | -2.20851   | -1.2713   | -0.9190   | -0.6073   |
| beta.layer        | -1.12968   | -0.7879   | -0.6301   | -0.4853   |
| beta.lc           | -0.04953   | 0.1216    | 0.2082    | 0.3038    |
| beta.alt          | 0.77241    | 0.9495    | 1.0595    | 1.1823    |
| beta.lc_modi      | 0.90714    | 1.1365    | 1.2941    | 1.4625    |
| beta.pop_den      | 6.63048    | 8.5868    | 10.2018   | 11.8183   |
| gamma.(Intercept) | 0.94351    | 1.1814    | 1.3156    | 1.4658    |
| Deviance          | 1231.78006 | 1234.8944 | 1237.4213 | 1240.6048 |
| 97.5%             |            |           |           |           |
| beta.(Intercept)  | 2.3746     |           |           |           |
| beta.layer.1      | 3.2386     |           |           |           |
| beta.layer.2      | -0.0914    |           |           |           |
| beta.layer        | -          | 0.2172    |           |           |
| beta.lc           |            | 0.4888    |           |           |
| beta.alt          | 1.4167     |           |           |           |
| beta.lc_modi      | 1.8656     |           |           |           |
| beta.pop_den      | 14.4870    |           |           |           |
| gamma.(Intercept) | 1.7759     |           |           |           |
| Deviance          | 1248.8583  |           |           |           |

### Potential scale reduction factors:

|                  | Point est. | Upper C.I. |
|------------------|------------|------------|
| beta.(Intercept) | 1.04       | 1.19       |

|                   |      |      |
|-------------------|------|------|
| beta.layer.1      | 1.10 | 1.37 |
| beta.layer.2      | 1.07 | 1.27 |
| beta.layer        | 1.04 | 1.18 |
| beta.lc           | 1.00 | 1.00 |
| beta.alt          | 1.09 | 1.33 |
| beta.lc_modi      | 1.00 | 1.01 |
| beta.pop_den      | 1.04 | 1.18 |
| gamma.(Intercept) | 1.04 | 1.15 |
| Deviance          | 1.01 | 1.03 |

**Multivariate psrf**

**1.15**



# Coronaviridae- ZIB iCAR model

## Inclusion of SARS CoV-2 origin

Iterations = 5001:9996 Thinning  
interval = 5 Number of chains = 2  
Sample size per chain = 1000

### 1. Empirical mean and standard deviation for each variable, plus standard error of the mean:

|                   | Mean      | SD        | Naive SE   | Time-series SE |
|-------------------|-----------|-----------|------------|----------------|
| beta.(Intercept)  | -4.5484   | 0.27529   | 6.156e-03  | 0.019618       |
| beta.layer.1      | 3.4225    | 0.87309   | 1.952e- 02 | 0.147034       |
| beta.layer.2      | -2.5347   | 0.77196   | 1.726e-02  | 0.129692       |
| beta.layer        | - 0.9393  | 0.34825   | 7.787e-03  | 0.033309       |
| beta.lc           | 0.3537    | 0.23934   | 5.352e-03  | 0.013159       |
| beta.alt          | 0.32173   | 7.194e-03 | 0.028046   |                |
| beta.lc_modi      | 1.2559    | 0.22885   | 5.117e- 03 | 0.011594       |
| beta.pop_den      | 0.5832    | 0.36399   | 8.139e- 03 | 0.018234       |
| gamma.(Intercept) | 796.8551  | 592.53081 | 1.325e+01  | 18.721051      |
| Vrho              | 9.9046    | 0.04366   | 9.762e-04  | 0.006487       |
| Deviance          | 3.728e-01 | 1.387722  |            | 171.2733       |
|                   |           |           |            | 16.67269       |

### 2. Quantiles for each variable:

|                   | 2.5%      | 25%      | 50%      | 75%       | 97.5%     |
|-------------------|-----------|----------|----------|-----------|-----------|
| beta.(Intercept)  | -5.05525  | -4.7544  | -4.5593  | -4.3546   | -4.0053   |
| beta.layer.1      | 1.59953   | 2.8593   | 3.4294   | 3.9959    | 5.0928    |
| beta.layer.2      | -3.96861  | -3.0312  | -2.5386  | -2.0806   | -0.9069   |
| beta.layer        | -1.63615  | -1.1788  | -0.9465  | -0.7072   | -0.2656   |
| beta.lc           | -0.11484  | 0.1942   | 0.3636   | 0.5142    | 0.8201    |
| beta.alt          | 0.11748   | 0.5173   | 0.7243   | 0.9253    | 1.4216    |
| beta.lc_modi      | 0.81031   | 1.1000   | 1.2535   | 1.4090    | 1.7086    |
| beta.pop_den      | -0.04103  | 0.3189   | 0.5609   | 0.8082    | 1.3255    |
| gamma.(Intercept) | 32.10191  | 337.8567 | 680.9352 | 1127.1751 | 2216.3527 |
| Vrho              | 9.9007    | 9.9356   | 9.9891   |           |           |
| Deviance          | 140.04840 | 159.1466 | 170.8898 | 182.8275  | 204.5376  |

### Potential scale reduction factors:

|                   | Point est. | Upper C.I. |
|-------------------|------------|------------|
| beta.(Intercept)  | 1.02       | 1.09       |
| beta.layer.1      | 1.05       | 1.08       |
| beta.layer.2      | 1.15       | 1.53       |
| beta.layer.1.02   |            | 1.03       |
| beta.lc           | 1.09       | 1.36       |
| beta.alt          | 1.06       | 1.24       |
| beta.lc_modi      | 1.05       | 1.21       |
| beta.pop_den      | 1.01       | 1.02       |
| gamma.(Intercept) | 1.00       | 1.00       |
| Vrho              | 1.00       | 1.00       |

|          |      |      |
|----------|------|------|
| Deviance | 1.03 | 1.07 |
|----------|------|------|

**Multivariate psrf**

**1.15**

|   | <b>Model</b>  | <b>Deviance</b> | <b>Perc</b> |
|---|---------------|-----------------|-------------|
| 1 | NULL          | 1896.61687      | 0           |
| 2 | env           | 571.05392       | 73          |
| 3 | binomial      | 587.76539       | 72          |
| 4 | binomial.icar | 77.34814        | 100         |
| 5 | ZIB.icar      | 74.03859        | 100         |

|   | <b>"masTSS"</b> | <b>"OA"</b> | <b>"prob"</b> |
|---|-----------------|-------------|---------------|
| 1 | 1               | 0.44        |               |

# Coronaviridae- ZIB iCAR model Random effects

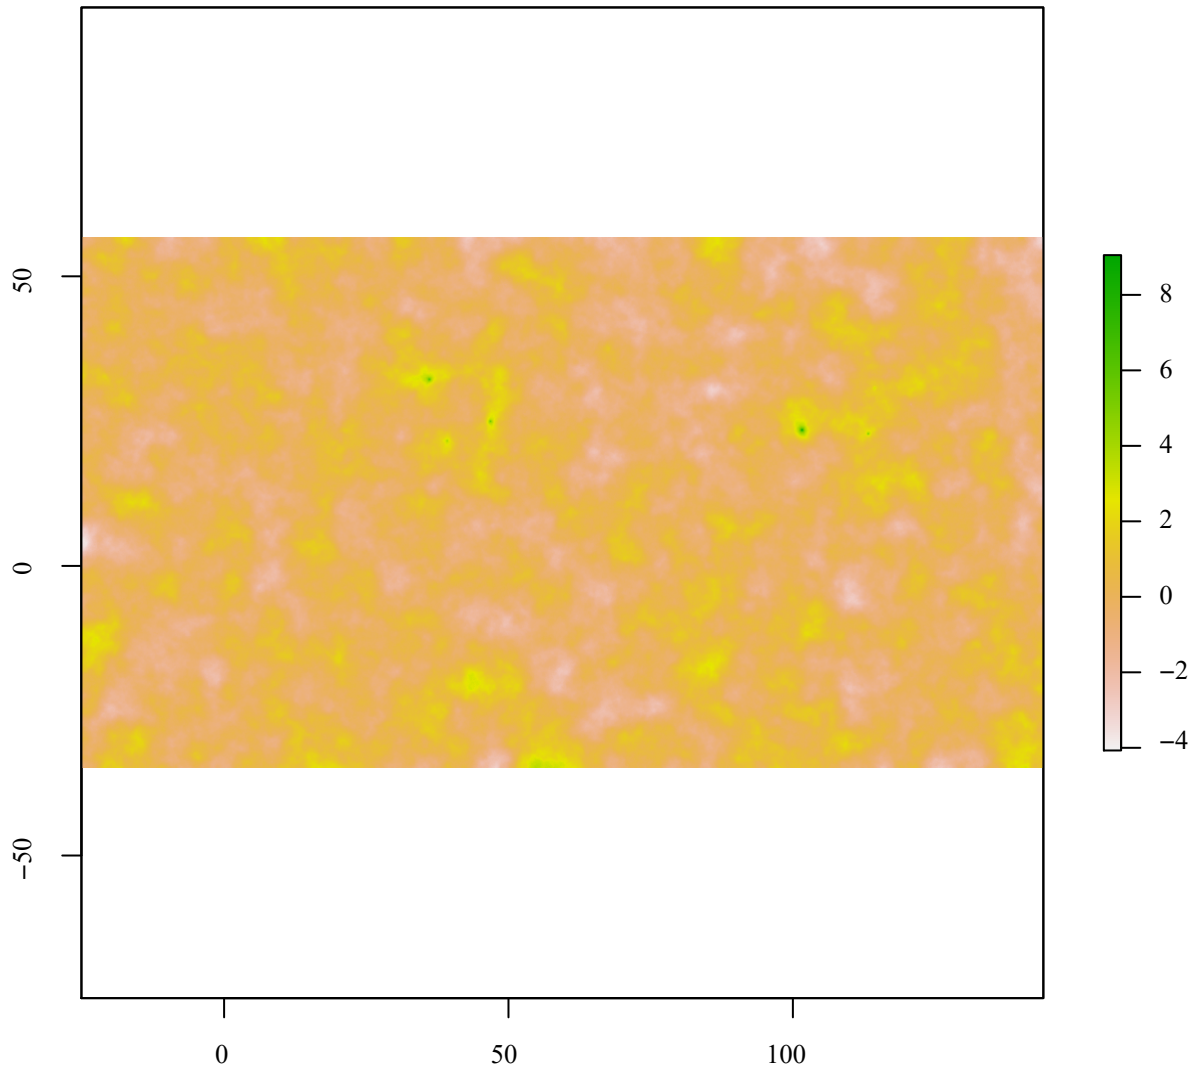

**Coronaviridae hotspots with detection >TSS threshold**  
**Inclusion of SARS CoV-2 origins**

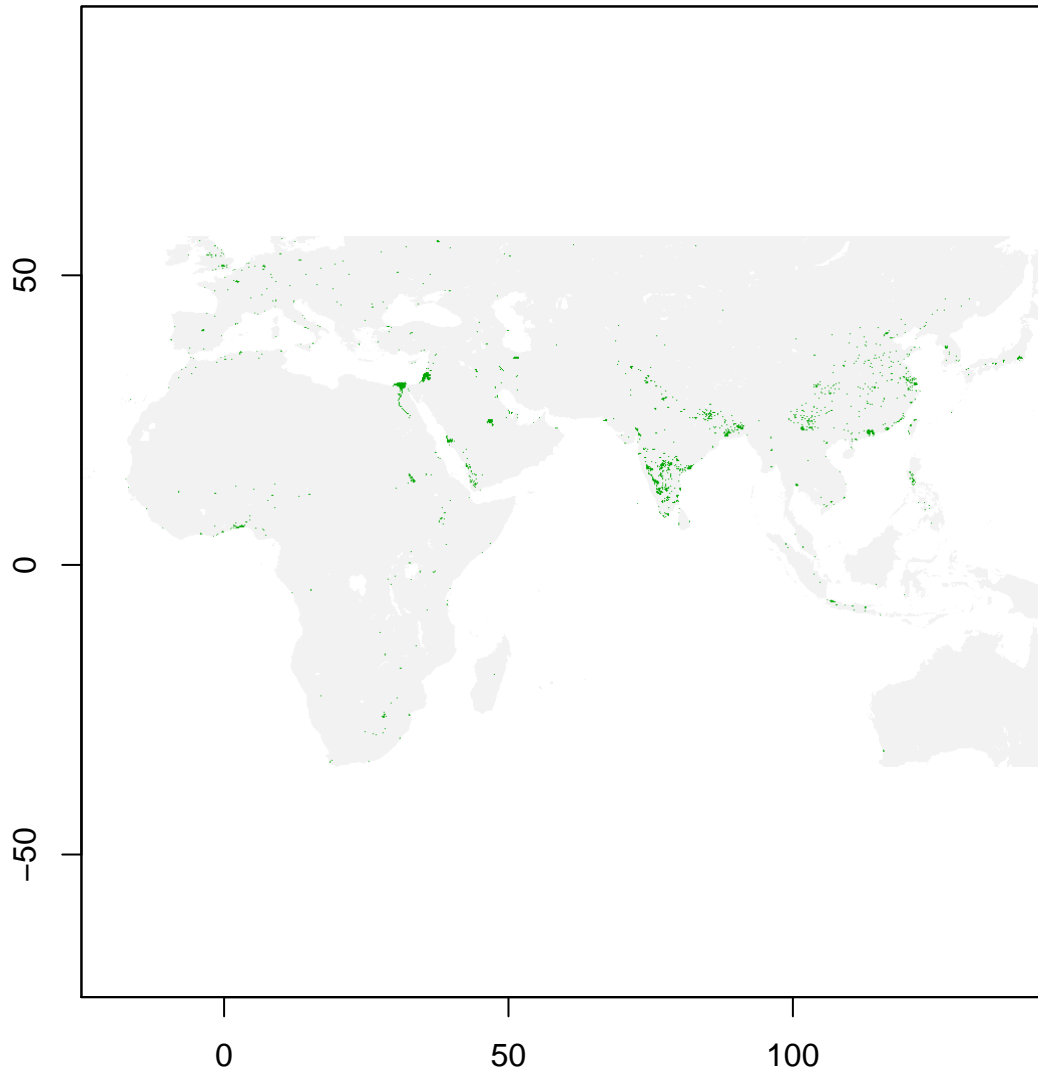

Supplement: s1 [file s1]
